# Supplementary material for: Reduced-representation sequencing identifies small effective population sizes of Anopheles gambiae in the north-western Lake Victoria basin, Uganda
Source: PubMed Central journal article supplement (PMC6080216; doi:10.1186/s12936-018-2432-0), 2018-08-06
Supplement: 12936_2018_2432_MOESM2_ESM.pdf [file 12936_2018_2432_MOESM2_ESM.pdf]

**Table S2. Bioinformatics pipeline detailing software programs and parameters used in the analysis of RADseq genomic data**

| <b>Software</b>                     | <b>Version</b> | <b>Function</b>                                                                                                                | <b>Parameters</b>                                                                                | <b>Reference</b>                                                                                                                                  |
|-------------------------------------|----------------|--------------------------------------------------------------------------------------------------------------------------------|--------------------------------------------------------------------------------------------------|---------------------------------------------------------------------------------------------------------------------------------------------------|
| (1) FastQC                          | 0.10.1         | Sequencing quality check                                                                                                       |                                                                                                  | Babraham (2011)                                                                                                                                   |
| (2) Trimmomatic                     | 0.30           | Remove Illumina sequencing adapters                                                                                            | ILLUMINACLIP:TruSeq3-PE.fa:2:30:10<br>LEADING:5<br>TRAILING:5<br>SLIDINGWINDOW:4:15<br>MINLEN:50 | Bolger <i>et al.</i> (2014)                                                                                                                       |
| (3) Trimmer.py                      | Custom         | RAD barcode, cut site and protector base removal; addition of unique IDs matching barcodes to individuals                      |                                                                                                  | Notre Dame Bioinformatics Lab (2014)                                                                                                              |
| (4) Burrows-Wheeler Alignment (BWA) | 0.6.2          | Alignment of reads to reference genome                                                                                         | -t 12 -q 5 -l 32 -k 3 -n 9 -o 1                                                                  | Li and Durbin (2009)                                                                                                                              |
| (5) sampToSam.pl                    | Custom         | Addition of read groups (corresponding to unique sample IDs) to SAM files; change overall quality score for GATK compatibility |                                                                                                  | <a href="https://github.com/gjragland/perlScripts/blob/master/sampToSam.pl">https://github.com/gjragland/perlScripts/blob/master/sampToSam.pl</a> |

**Table S2. Bioinformatics pipeline detailing software programs and parameters used in the analysis of RADseq genomic data**

|                                  |        |                                                                                             |                                                                                                                                                                                                                                                                                                                                                                          |                                                                                             |
|----------------------------------|--------|---------------------------------------------------------------------------------------------|--------------------------------------------------------------------------------------------------------------------------------------------------------------------------------------------------------------------------------------------------------------------------------------------------------------------------------------------------------------------------|---------------------------------------------------------------------------------------------|
| (6) Picard Tools                 | 1.119  | Pre-processing of reads prior to variant calling                                            | CleanSam<br>-VALIDATION_STRINGENCY=LENIENT<br>SortSam<br>-SO=coordinate<br>-VALIDATION_STRINGENCY=LENIENT<br>BuildBamIndex<br>-VALIDATION_STRINGENCY=LENIENT<br>CreateSequenceDictionary                                                                                                                                                                                 | <a href="http://broadinstitute.github.io/picard">http://broadinstitute.github.io/picard</a> |
| (7) GenomeAnalysisToolKit (GATK) | 3.3.0  | Variant (SNP) calling                                                                       | -T UnifiedGenotyper<br>--downsampling_type NONE<br>--downsample_to_coverage 1000<br>--genotype_likelihoods_model BOTH<br>--computeSLOD<br>-rf BadCigar<br>--fix_misencoded_quality_scores                                                                                                                                                                                | Van de Auwera <i>et al.</i> (2013)                                                          |
| (8) GATK                         | 3.3.0  | Quality filtering of SNP calls; select SNPs that have passed filters and are biallelic only | -T VariantFiltration<br>--filterExpression "QD < 5.0    FS > 60.0    MQ < 40.0    HaplotypeScore > 13.0    MappingQualityRankSum < -12.5    ReadPosRankSum < -8.0"<br>--missingValuesInExpressionsShouldEvaluateAsFailing<br>-T SelectVariants<br>--selectexpressions "vc.isNotFiltered() && vc.isSNP()"<br>--selectTypeToExclude INDEL<br>--restrictAllelesTo BIALLELIC | Van de Auwera <i>et al.</i> (2013)                                                          |
| (9) VCFtools                     | 0.1.15 | Pruning of dataset to include highest quality SNPs shared between populations               | --mac 7 (at least 4 diploid individuals called at site)<br>--minGQ 30.0 (genotype quality of at least 30)<br>--minDP 30.0 (30 reads supporting called genotype)<br>--singletons<br>--max-missing 0.2 (proportion of missing data > 80%)                                                                                                                                  | Danecek <i>et al.</i> (2011)                                                                |
