# Supplementary material for: Reduced-representation sequencing identifies small effective population sizes of Anopheles gambiae in the north-western Lake Victoria basin, Uganda
Source: PubMed Central journal article supplement (PMC6080216; doi:10.1186/s12936-018-2432-0), 2018-08-06

**Figure S1. (a-d) PCA plots of *An. gambiae* chromosome arms not shown in the main text**

Each dot represents an individual mosquito (N=79) from one of the six sampling sites, which are color-coded according to the legend as follows: BK (Bukasa); BL (Bugala); EB (Entebbe); NZ (Nsadzi); SY (Sserinya), and WL (Wamala). The first principal component (PC1) and its percentage variance are represented on the y-axis, and, likewise, the second principal component (PC2) and its percentage variances are represented on the x-axis. *n* refers to the number of SNPs mapped to the chromosome arm using AgamP4 as a reference genome [42].

**(a) Chromosome 2R after removal of the 2Rb inversion (n = 1,307)**

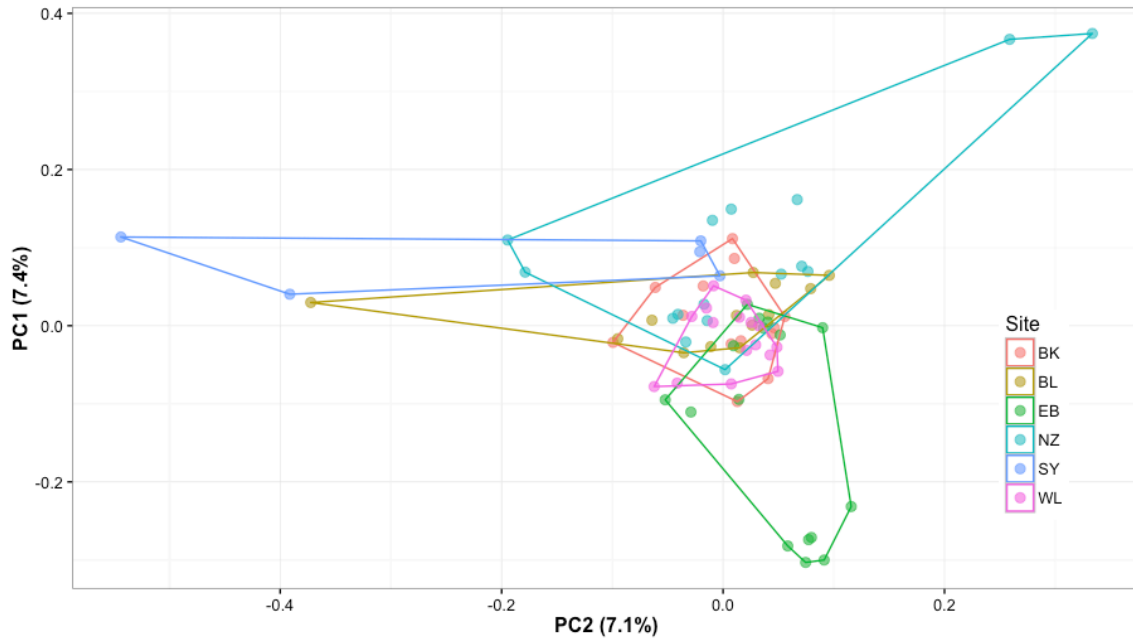

**(b) Chromosome 3L (n = 936)**

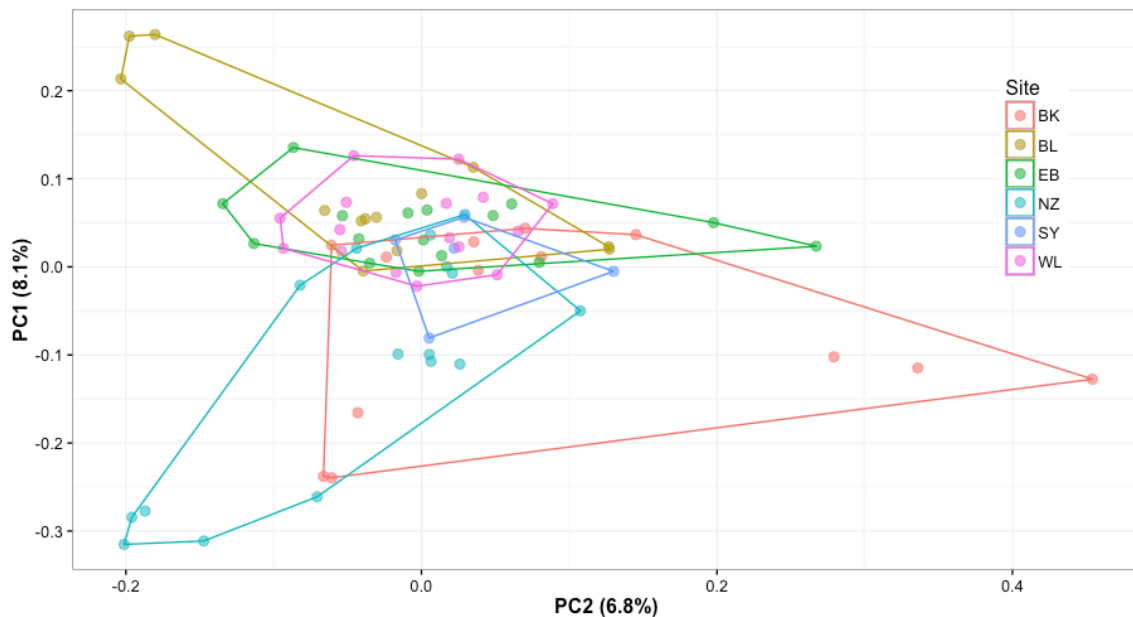

**Figure S1. (a-d) PCA plots of *An. gambiae* chromosome arms not shown in the main text**

**(c) Chromosome 3R (n = 1,204)**

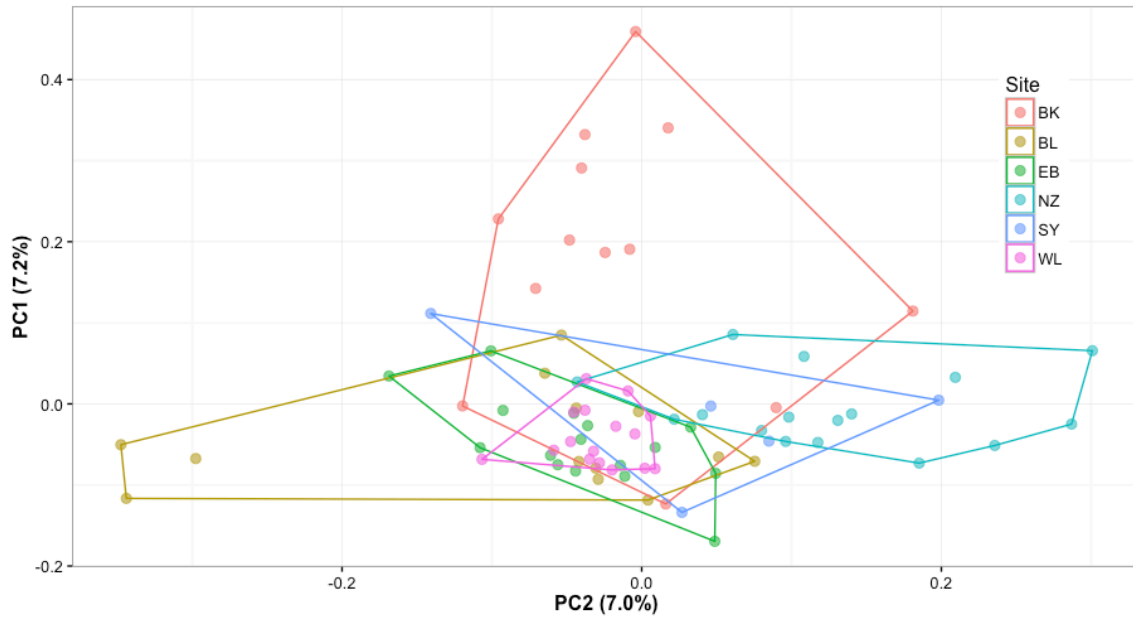

**(d) Chromosome X (n = 347)**

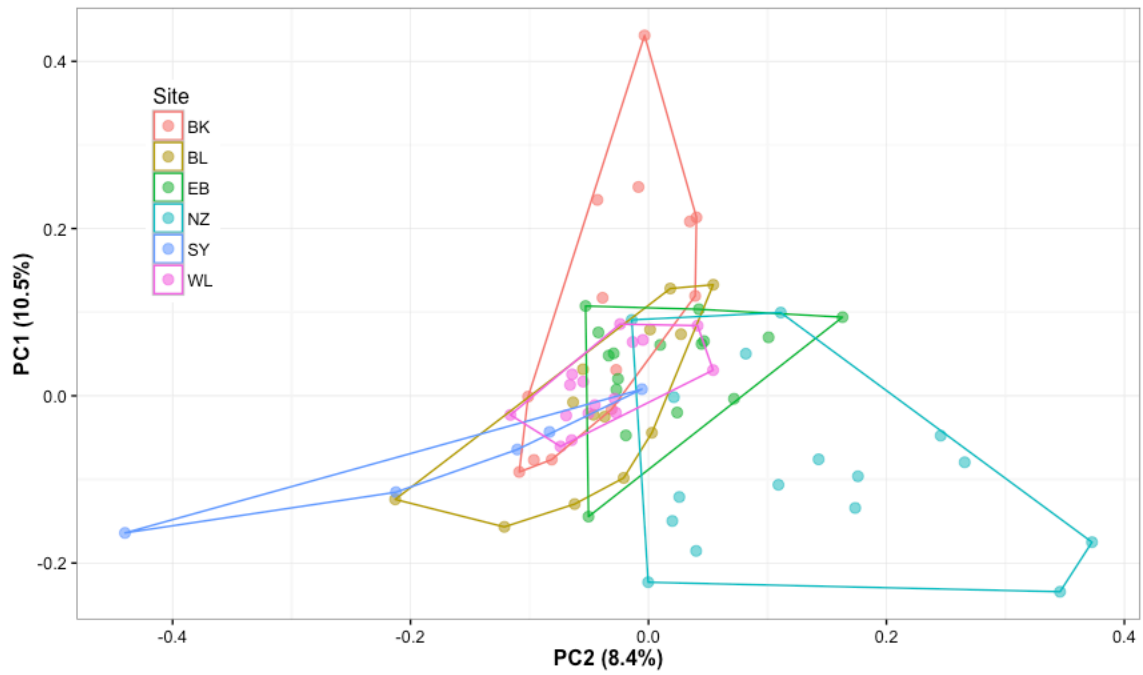

Supplement: 12936_2018_2432_MOESM5_ESM.pdf [file 12936_2018_2432_MOESM5_ESM.pdf]
