# Supplementary material for: Reduced-representation sequencing identifies small effective population sizes of Anopheles gambiae in the north-western Lake Victoria basin, Uganda
Source: PubMed Central journal article supplement (PMC6080216; doi:10.1186/s12936-018-2432-0), 2018-08-06

**Figure S2. ADMIXTURE bar plot of chromosome 2L SNPs ( $K=2$ ) showing probable ancestry fractions of the six *An. gambiae* populations ( $N=79$ ) based on the 2La inversion.** Vertical bars represent individual mosquitoes, which are stacked from left to right in groups of 16 (except: Bugala ( $N=13$ ), Bukasa ( $N=13$ ) and Sserinya (SY) ( $N=5$ )) according to their alphabetical sampling site. Populations are listed on the x-axis. Ancestry fractions ( $K=2$ ) are assigned according to maximum likelihood probabilities. Each fraction represents a karyotype of different color: blue = inverted ( $2La/a$ ), yellow = standard ( $2L+^a/2L+^a$ ), and blue/yellow = heterozygote ( $2La/+^a$ ).

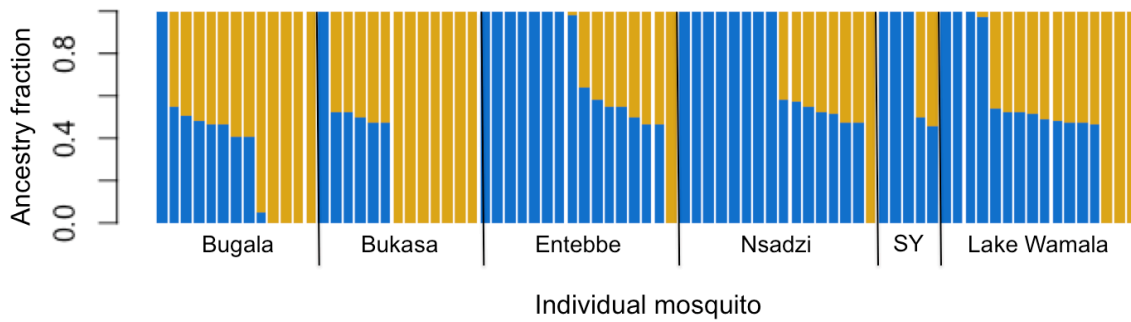

Supplement: 12936_2018_2432_MOESM6_ESM.pdf [file 12936_2018_2432_MOESM6_ESM.pdf]
