# Supplementary material for: Reduced-representation sequencing identifies small effective population sizes of Anopheles gambiae in the north-western Lake Victoria basin, Uganda
Source: PubMed Central journal article supplement (PMC6080216; doi:10.1186/s12936-018-2432-0), 2018-08-06

**Figure S3. Generalized linear model plot of genetic differentiation against log geographic distance based on median  $F_{ST}$ .**

The regression equation ( $y = 0.104975 - 0.012853x$ ) describes the statistical relationship between the predictor  $\ln(\text{geographic distance})$  and response ( $\text{Median } F_{st}/(1-\text{Median } F_{st})$ ) variables. The line of best fit is represented by the red dotted line.

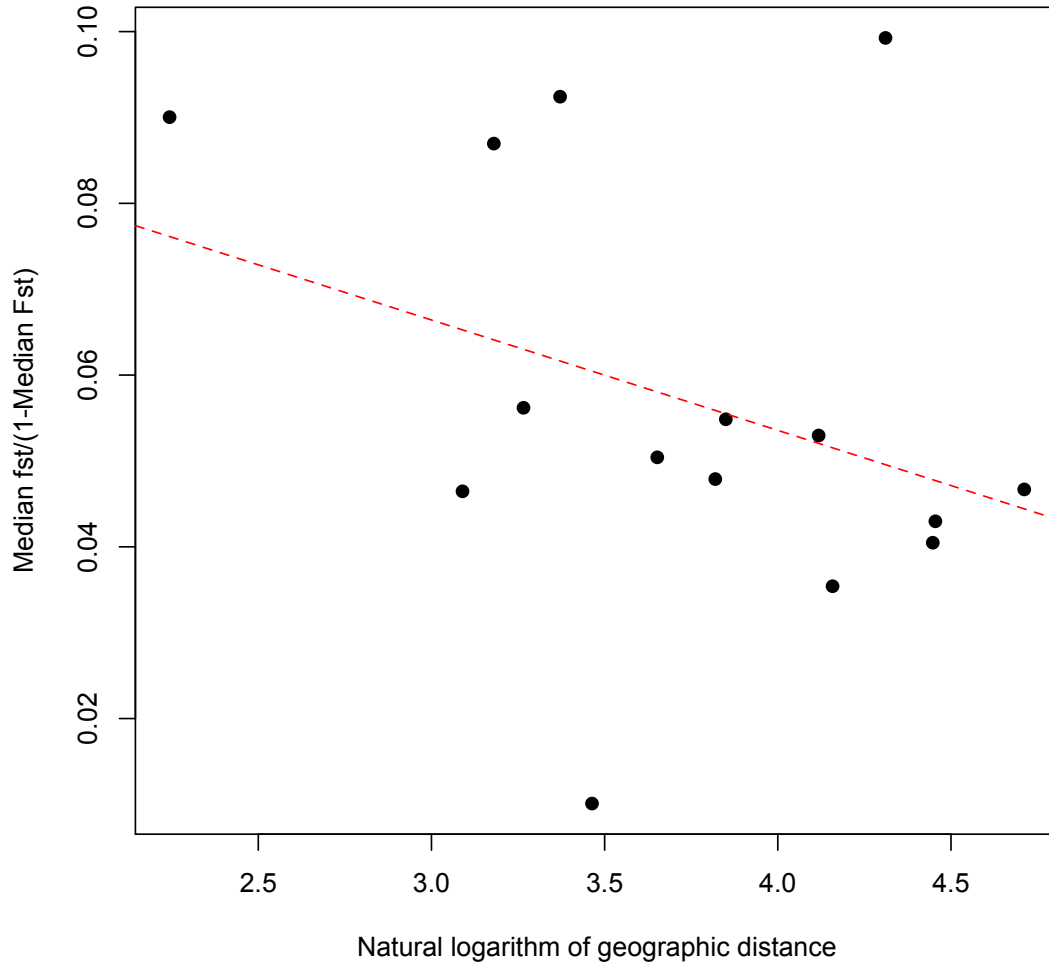

Supplement: 12936_2018_2432_MOESM7_ESM.pdf [file 12936_2018_2432_MOESM7_ESM.pdf]
