# Supplementary material for: Reduced-representation sequencing identifies small effective population sizes of Anopheles gambiae in the north-western Lake Victoria basin, Uganda
Source: Malar J. 2018 Aug 6;17:285. doi: 10.1186/s12936-018-2432-0 (PMC6080216; doi:10.1186/s12936-018-2432-0)
Supplement: Supplementary file 1 — Additional file 1: Table S1. GPS co-ordinates and distances between entomological sampling sites. [file 12936_2018_2432_MOESM1_ESM.xlsx]

## Sheet: distance
Table S1. Latitude and longitude co-ordinates and distances (km) of entomological sampling sites
From	Longitude		Latitude		To	Longitude		Latitude		Distance (km)
	Decimal degrees	Degrees, minutes, seconds	Decimal degrees	Degrees, minutes, seconds		Decimal degrees	Degrees, minutes, seconds	Decimal degrees	Degrees, minutes, seconds
Entebbe (Lunnyo)§	32.4604	32°27'37.35" E	0.067595	0°04'03.34" N	Wamala (Naama)§	31.9971	31°59'49.68" E	0.409587	0°24'34.51" N	63.95
					Bugala (Lutoboka)	32.2939	32°17'38.12" E	-0.308974	0°18'32.31" S	45.58
					Bukasa (Nakibanga)	32.4483	32°26'53.98" E	-0.487848	0°29'16.25" S	61.43
					Sserinya	32.3641	32°21'50.63" E	-0.252263	0°15'8.15" S	31.93
					Nsadzi (Kansambwe)	32.5856	32°35'08.33" E	-0.085986	0°05'09.55" S	21.97
Wamala (Naama)§	31.9971	31°59'49.68" E	0.409587	0°24'34.51" N	Bugala (Lutoboka)	32.2939	32°17'38.12" E	-0.308974	0°18'32.31" S	86.05
					Bukasa (Nakibanga)	32.4483	32°26'53.98" E	-0.487848	0°29'16.25" S	111.22
					Sserinya	32.3641	32°21'50.63" E	-0.252263	0°15'8.15" S	74.51
					Nsadzi (Kansambwe)	32.5856	32°35'08.33" E	-0.085986	0°05'09.55" S	85.41
Bugala (Lutoboka)	32.2939	32°17'38.12" E	-0.308974	0°18'32.31" S	Bukasa (Nakibanga)	32.4483	32°26'53.98" E	-0.487848	0°29'16.25" S	26.2
					Sserinya	32.3641	32°22'18.20" E	-0.252263	0°15'8.15" S	9.43
					Nsadzi (Kansambwe)	32.5856	32°35'08.33" E	-0.085986	0°05'09.55" S	38.55
Bukasa (Nakibanga)	32.4483	32°26'53.98" E	-0.487848	0°29'16.25" S	Sserinya	32.3641	32°21'50.63" E	-0.252263	0°15'8.15" S	24.05
					Nsadzi (Kansambwe)	32.5856	32°35'08.33" E	-0.085986	0°05'09.55" S	46.99
Sserinya	32.3641	32°21'50.63" E	-0.252263	0°15'8.15" S	Nsadzi (Kansambwe)	32.5856	32°35'08.33" E	-0.085986	0°05'09.55" S	29.12
§ Denotes mainland site
(TO CONVERT GPS CO-ORDS FROM DECIMAL DEGS TO DEGS, MINS, SECS) http://rapidtables.com/convert/number/degrees-to-degrees-minutes-seconds.htm
(TO CALCULATE THE DISTANCE BTWN TWO CO-ORD POINTS) http://boulter.com/gps/distance/
Sserinya (Kafuna)	32.3717	32°22'18.20" E	-0.263803	0°15'49.69" S
Sserinya (Bbosa)	32.3564	32°21'23.07" E	-0.240722	0°14'26.60" S
