# Supplementary material for: Reduced-representation sequencing identifies small effective population sizes of Anopheles gambiae in the north-western Lake Victoria basin, Uganda
Source: Malar J. 2018 Aug 6;17:285. doi: 10.1186/s12936-018-2432-0 (PMC6080216; doi:10.1186/s12936-018-2432-0)
Supplement: Supplementary file 3 — Additional file 3: Table S3. Kinship coefficient estimates and percentage missing data values per individual. [file 12936_2018_2432_MOESM3_ESM.xlsx]

## Sheet: depth
INDV	N_SITES	MEAN_DEPTH
EB.IR.001	5166	92.495
EB.IR.006	5157	91.1026
EB.IR.009	5135	87.8232
WL.IR.002	5151	81.7816
BL.IR.033	5163	81.1482
WL.IR.015	5153	78.6274
BL.IR.003	5173	77.6275
EB.IR.007	5151	76.2825
WL.IR.011	5163	76.1172
EB.LC.006	5159	75.3948
WL.IR.017	5166	74.6717
BL.IR.032	5162	74.5568
WL.IR.014	5155	74.5556
EB.LC.010	5161	74.5443
WL.IR.016	5164	74.433
NZ.LC.005	5155	73.291
EB.LC.002	5151	73.2803
SY.LC.2.002	5173	72.9861
NZ.LC.001	5158	72.2728
NZ.IR.005	5161	72.0242
WL.IR.001	5162	71.591
NZ.LC.006	5163	71.4507
EB.IR.004	5153	71.4302
EB.IR.003	5151	70.3128
WL.IR.018	5149	69.9736
WL.IR.022	5165	69.4651
SY.LC.2.006	5163	68.958
SY.LC.1.003	5164	68.0585
BK.IR.013	5145	67.8882
SY.IR.2.005	5160	67.7434
BK.IR.002	5151	67.2869
SY.IR.2.004	5172	67.1205
BK.IR.003	5163	67.0467
NZ.LC.M+1.011	5162	66.7795
WL.IR.020	5166	66.7491
BL.IR.009	5155	66.64
BK.IR.020	5157	66.2963
WL.IR.025	5156	65.9845
SY.IR.2.003	5169	65.8899
NZ.LC.M+1.010	5157	65.5055
BL.IR.031	5152	65.2731
BL.IR.014	5164	64.2785
WL.IR.005	5160	64.23
SY.LC.2.005	5163	64.1071
BK.IR.008	5145	63.8906
NZ.IR.011	5144	63.8567
SY.LC.1.011	5169	63.4407
SY.LC.2.007	5162	63.1763
SY.IR.2.002	5150	63.1462
BK.IR.005	5158	62.3784
NZ.IR.002	5170	62.272
BL.IR.015	5147	61.1492
SY.LC.2.003	5155	60.8089
NZ.IR.007	5168	60.215
WL.IR.003	5165	60.194
EB.IR.002	5157	59.9816
NZ.IR.009	5166	59.8227
SY.LC.2.004	5156	59.2789
NZ.IR.006	5154	59.1292
WL.IR.024	5156	58.9666
BK.IR.007	5160	58.8676
NZ.IR.008	5170	58.6948
BL.IR.016	5159	58.5292
BL.IR.023	5146	57.704
WL.IR.012	5162	57.2236
BL.IR.018	5150	56.8039
EB.LC.003	5162	56.1313
EB.LC.008	5165	55.9704
SY.LC.1.001	5156	55.7071
NZ.LC.M+1.009	5160	55.589
SY.LC.1.015	5166	55.2698
WL.IR.021	5158	54.6941
BK.IR.015	5162	54.4107
BL.IR.030	5153	54.1684
EB.LC.004	5167	52.8159
EB.IR.008	5154	52.5572
SY.IR.2.001	5162	51.795
EB.IR.005	5166	51.523
NZ.LC.M+1.007	5153	51.3256
BL.IR.011	5156	50.5434
NZ.IR.004	5163	49.7928
SY.LC.2.001	5169	46.019
NZ.LC.002	5149	45.3995
BK.IR.009	5148	42.3772
BK.IR.001	5147	38.665
BL.IR.012	5156	38.5233
BL.IR.001	5166	35.9704
BL.IR.034	5141	32.7183
EB.LC.001	5169	31.6628
BK.IR.012	5149	31.0392
BL.IR.013	5119	29.5155
BK.IR.019	5151	29.3493
BK.IR.006	5152	29.2071
BK.IR.010	5166	21.4981
BK.IR.018	5136	19.5241
BK.IR.014	5138	16.3453

## Sheet: missingness
Table S3. Percentage missing data values (N=96) calculated with the --missing-indv parameter in VCFtools v.0.1.15
INDV	N_DATA	N_GENOTYPES_FILTERED	N_MISS	F_MISS	%
BK.IR.014	5175	0	4710	0.910145	91.0145
BK.IR.018	5175	0	4449	0.85971	85.971
BK.IR.010	5175	0	4188	0.809275	80.9275
BK.IR.019	5175	0	3174	0.613333	61.3333
BK.IR.006	5175	0	3158	0.610242	61.0242
BL.IR.013	5175	0	2959	0.571787	57.1787
BK.IR.012	5175	0	2819	0.544734	54.4734
EB.LC.001	5175	0	2528	0.488502	48.8502
BL.IR.001	5175	0	2219	0.428792	42.8792
BL.IR.034	5175	0	2129	0.411401	41.1401
BK.IR.001	5175	0	1858	0.359034	35.9034
BL.IR.012	5175	0	1845	0.356522	35.6522
BK.IR.009	5175	0	1822	0.352077	35.2077
BK.IR.003	5175	0	787	0.152077	15.2077
EB.IR.005	5175	0	677	0.130821	13.0821
NZ.LC.002	5175	0	610	0.117874	11.7874
EB.LC.003	5175	0	591	0.114203	11.4203
SY.IR.2.001	5175	0	561	0.108406	10.8406
EB.LC.008	5175	0	508	0.0981643	9.81643
BK.IR.015	5175	0	431	0.083285	8.3285
BL.IR.011	5175	0	430	0.0830918	8.30918
EB.LC.004	5175	0	429	0.0828986	8.28986
NZ.IR.007	5175	0	425	0.0821256	8.21256
SY.LC.2.001	5175	0	425	0.0821256	8.21256
EB.IR.008	5175	0	421	0.0813527	8.13527
NZ.LC.M+1.007	5175	0	368	0.0711111	7.11111
BL.IR.030	5175	0	362	0.0699517	6.99517
BK.IR.008	5175	0	347	0.0670531	6.70531
NZ.IR.004	5175	0	342	0.066087	6.6087
WL.IR.016	5175	0	309	0.0597101	5.97101
NZ.IR.008	5175	0	287	0.0554589	5.54589
BL.IR.018	5175	0	276	0.0533333	5.33333
SY.LC.2.004	5175	0	267	0.0515942	5.15942
SY.LC.2.007	5175	0	248	0.0479227	4.79227
BK.IR.007	5175	0	247	0.0477295	4.77295
EB.IR.002	5175	0	242	0.0467633	4.67633
WL.IR.020	5175	0	239	0.0461836	4.61836
WL.IR.024	5175	0	232	0.0448309	4.48309
SY.LC.1.015	5175	0	227	0.0438647	4.38647
NZ.IR.011	5175	0	222	0.0428986	4.28986
WL.IR.021	5175	0	221	0.0427053	4.27053
BK.IR.013	5175	0	208	0.0401932	4.01932
NZ.IR.006	5175	0	208	0.0401932	4.01932
BL.IR.016	5175	0	207	0.04	4
SY.LC.2.003	5175	0	200	0.0386473	3.86473
WL.IR.003	5175	0	188	0.0363285	3.63285
NZ.LC.M+1.009	5175	0	186	0.035942	3.5942
WL.IR.012	5175	0	184	0.0355556	3.55556
NZ.IR.009	5175	0	181	0.0349758	3.49758
SY.IR.2.002	5175	0	181	0.0349758	3.49758
BL.IR.023	5175	0	178	0.0343961	3.43961
WL.IR.014	5175	0	176	0.0340097	3.40097
BL.IR.015	5175	0	169	0.032657	3.2657
SY.LC.1.003	5175	0	169	0.032657	3.2657
BK.IR.002	5175	0	164	0.0316908	3.16908
BL.IR.031	5175	0	164	0.0316908	3.16908
NZ.IR.002	5175	0	164	0.0316908	3.16908
SY.LC.1.001	5175	0	162	0.0313043	3.13043
WL.IR.005	5175	0	157	0.0303382	3.03382
NZ.LC.M+1.010	5175	0	156	0.0301449	3.01449
BK.IR.020	5175	0	154	0.0297585	2.97585
WL.IR.025	5175	0	149	0.0287923	2.87923
BL.IR.014	5175	0	132	0.0255072	2.55072
SY.IR.2.005	5175	0	126	0.0243478	2.43478
EB.IR.004	5175	0	123	0.0237681	2.37681
NZ.LC.M+1.011	5175	0	123	0.0237681	2.37681
SY.LC.1.011	5175	0	123	0.0237681	2.37681
EB.LC.002	5175	0	122	0.0235749	2.35749
NZ.LC.005	5175	0	121	0.0233816	2.33816
BL.IR.009	5175	0	120	0.0231884	2.31884
BK.IR.005	5175	0	115	0.0222222	2.22222
BL.IR.032	5175	0	111	0.0214493	2.14493
EB.LC.010	5175	0	111	0.0214493	2.14493
WL.IR.022	5175	0	110	0.021256	2.1256
EB.IR.009	5175	0	106	0.0204831	2.04831
WL.IR.001	5175	0	102	0.0197101	1.97101
EB.IR.007	5175	0	95	0.0183575	1.83575
NZ.LC.001	5175	0	95	0.0183575	1.83575
SY.LC.2.002	5175	0	92	0.0177778	1.77778
WL.IR.018	5175	0	89	0.0171981	1.71981
SY.IR.2.003	5175	0	87	0.0168116	1.68116
BL.IR.003	5175	0	86	0.0166184	1.66184
EB.IR.003	5175	0	85	0.0164251	1.64251
NZ.LC.006	5175	0	83	0.0160386	1.60386
WL.IR.017	5175	0	76	0.014686	1.4686
SY.LC.2.005	5175	0	75	0.0144928	1.44928
NZ.IR.005	5175	0	73	0.0141063	1.41063
EB.LC.006	5175	0	70	0.0135266	1.35266
SY.IR.2.004	5175	0	66	0.0127536	1.27536
SY.LC.2.006	5175	0	66	0.0127536	1.27536
WL.IR.011	5175	0	64	0.0123671	1.23671
WL.IR.002	5175	0	63	0.0121739	1.21739
WL.IR.015	5175	0	59	0.011401	1.1401
BL.IR.033	5175	0	57	0.0110145	1.10145
EB.IR.006	5175	0	46	0.00888889	0.888889
EB.IR.001	5175	0	38	0.007343	0.7343

## Sheet: relatedness_yang
Table S3. Kinship coefficients calculated with the --relatedness parameter in VCFtools v.0.1.15 based on an algorithm reported by Yang et al. (2010)
INDV1	INDV2	RELATEDNESS_AJK	%
SY.LC.2.001	SY.LC.2.002	0.897187	89.7187
SY.LC.2.006	SY.LC.2.007	0.849336	84.9336
SY.LC.2.003	SY.LC.2.004	0.761585	76.1585
SY.LC.2.001	SY.LC.2.005	0.698214	69.8214
SY.LC.2.002	SY.LC.2.004	0.651185	65.1185
SY.IR.2.001	SY.IR.2.003	0.647097	64.7097
SY.IR.2.001	SY.IR.2.002	0.625412	62.5412
SY.LC.2.002	SY.LC.2.003	0.609666	60.9666
SY.LC.2.003	SY.LC.2.005	0.60172	60.172
SY.LC.2.002	SY.LC.2.005	0.574052	57.4052
SY.LC.1.001	SY.LC.1.011	0.553221	55.3221
SY.LC.2.001	SY.LC.2.004	0.537836	53.7836
SY.LC.2.001	SY.LC.2.003	0.498896	49.8896
SY.LC.1.003	SY.LC.1.015	0.495248	49.5248
SY.LC.2.003	SY.LC.2.006	0.486253	48.6253
SY.LC.2.005	SY.LC.2.006	0.484749	48.4749
SY.LC.2.003	SY.LC.2.007	0.427127	42.7127
NZ.IR.011	NZ.LC.M+1.010	0.410882	41.0882
BK.IR.005	BK.IR.018	0.402394	40.2394
SY.LC.2.004	SY.LC.2.006	0.399678	39.9678
SY.IR.2.002	SY.IR.2.003	0.387358	38.7358
SY.LC.2.005	SY.LC.2.007	0.383704	38.3704
SY.LC.2.004	SY.LC.2.007	0.372409	37.2409
SY.LC.2.001	SY.LC.2.007	0.370695	37.0695
SY.LC.2.004	SY.LC.2.005	0.358312	35.8312
BL.IR.023	BL.IR.030	0.314671	31.4671
BK.IR.014	BK.IR.020	0.307364	30.7364
SY.LC.2.002	SY.LC.2.007	0.304652	30.4652
BL.IR.001	BL.IR.030	0.277711	27.7711
BK.IR.013	BK.IR.014	0.276602	27.6602
BK.IR.013	BK.IR.020	0.261302	26.1302
BK.IR.002	BK.IR.014	0.244546	24.4546
BK.IR.001	BK.IR.013	0.235296	23.5296
SY.LC.2.001	SY.LC.2.006	0.234431	23.4431
BL.IR.016	BL.IR.031	0.226476	22.6476
BL.IR.018	BL.IR.023	0.225188	22.5188
BK.IR.010	BK.IR.019	0.223171	22.3171
BK.IR.002	BK.IR.003	0.222379	22.2379
BL.IR.030	BL.IR.031	0.221063	22.1063
BL.IR.016	BL.IR.023	0.21472	21.472
BL.IR.018	BL.IR.030	0.213452	21.3452
NZ.IR.008	NZ.IR.009	0.211913	21.1913
BL.IR.011	BL.IR.016	0.211852	21.1852
BK.IR.015	BK.IR.020	0.21072	21.072
BL.IR.011	BL.IR.023	0.201516	20.1516
BK.IR.003	BK.IR.019	0.200593	20.0593
BK.IR.006	BK.IR.010	0.20001	20.001
BL.IR.011	BL.IR.030	0.193832	19.3832
BK.IR.014	BK.IR.015	0.187149	18.7149
BK.IR.002	BK.IR.018	0.184892	18.4892
BL.IR.016	BL.IR.018	0.181682	18.1682
BL.IR.011	BL.IR.031	0.179964	17.9964
SY.LC.2.002	SY.LC.2.006	0.179122	17.9122
EB.IR.003	EB.IR.006	0.178389	17.8389
BL.IR.016	BL.IR.030	0.176626	17.6626
BL.IR.034	WL.IR.021	0.17469	17.469
NZ.IR.008	NZ.LC.M+1.009	0.172181	17.2181
BL.IR.001	BL.IR.032	0.169547	16.9547
EB.IR.008	EB.IR.009	0.165356	16.5356
BL.IR.018	BL.IR.031	0.157294	15.7294
NZ.IR.007	NZ.IR.008	0.155635	15.5635
BK.IR.009	BK.IR.018	0.153416	15.3416
BK.IR.005	BK.IR.019	0.153243	15.3243
BL.IR.023	BL.IR.032	0.152825	15.2825
BL.IR.023	BL.IR.031	0.152512	15.2512
BL.IR.014	SY.IR.2.004	0.150234	15.0234
SY.IR.2.003	SY.LC.2.002	0.148646	14.8646
BK.IR.008	BK.IR.019	0.147449	14.7449
BK.IR.013	BK.IR.015	0.145734	14.5734
SY.IR.2.003	SY.LC.2.003	0.144859	14.4859
BK.IR.010	BK.IR.012	0.141306	14.1306
BK.IR.008	BK.IR.013	0.141127	14.1127
EB.IR.002	EB.LC.002	0.138777	13.8777
EB.IR.003	EB.LC.002	0.138251	13.8251
EB.IR.002	EB.IR.008	0.13816	13.816
NZ.IR.009	NZ.IR.011	0.135444	13.5444
EB.IR.003	EB.IR.005	0.131415	13.1415
BK.IR.013	BK.IR.019	0.131002	13.1002
BL.IR.011	BL.IR.018	0.130525	13.0525
NZ.IR.008	NZ.IR.011	0.129801	12.9801
BL.IR.016	WL.IR.021	0.128881	12.8881
BK.IR.005	BK.IR.006	0.127631	12.7631
BL.IR.013	WL.IR.014	0.126878	12.6878
NZ.LC.M+1.009	NZ.LC.M+1.010	0.124858	12.4858
BK.IR.006	WL.IR.014	0.124299	12.4299
EB.IR.003	EB.IR.009	0.124294	12.4294
BK.IR.001	BK.IR.012	0.124207	12.4207
BK.IR.018	BK.IR.020	0.124097	12.4097
EB.IR.003	EB.IR.008	0.124074	12.4074
SY.IR.2.003	SY.IR.2.004	0.123823	12.3823
BL.IR.013	BL.IR.014	0.121195	12.1195
EB.IR.005	EB.LC.002	0.120234	12.0234
EB.IR.002	EB.IR.005	0.119478	11.9478
BK.IR.018	BL.IR.033	0.117341	11.7341
BK.IR.002	BK.IR.013	0.116627	11.6627
EB.LC.001	EB.LC.006	0.115921	11.5921
BK.IR.019	BL.IR.034	0.115901	11.5901
WL.IR.014	WL.IR.021	0.114011	11.4011
NZ.IR.007	SY.LC.1.001	0.113764	11.3764
BK.IR.012	BK.IR.018	0.112619	11.2619
NZ.IR.008	NZ.LC.002	0.11261	11.261
SY.IR.2.003	SY.LC.2.007	0.112454	11.2454
NZ.IR.006	NZ.LC.M+1.010	0.111676	11.1676
BK.IR.002	BK.IR.005	0.110506	11.0506
BL.IR.016	SY.IR.2.005	0.10979	10.979
BK.IR.018	WL.IR.021	0.109245	10.9245
BK.IR.006	WL.IR.021	0.109057	10.9057
BK.IR.005	BK.IR.013	0.107147	10.7147
NZ.IR.004	NZ.LC.M+1.009	0.107069	10.7069
BL.IR.013	WL.IR.016	0.105753	10.5753
EB.IR.004	EB.LC.006	0.104241	10.4241
BK.IR.008	BL.IR.013	0.103797	10.3797
NZ.LC.006	NZ.LC.M+1.009	0.102881	10.2881
BK.IR.014	EB.IR.006	0.100661	10.0661
BL.IR.013	BL.IR.034	0.100658	10.0658
BK.IR.002	BL.IR.034	0.100211	10.0211
BK.IR.002	BK.IR.020	0.0998535	9.98535
EB.IR.002	EB.IR.003	0.0997722	9.97722
BK.IR.014	WL.IR.016	0.0995488	9.95488
BK.IR.014	BL.IR.013	0.0987843	9.87843
EB.IR.001	EB.IR.005	0.0984286	9.84286
NZ.IR.009	NZ.LC.M+1.009	0.0982459	9.82459
NZ.LC.001	NZ.LC.M+1.009	0.0977204	9.77204
BK.IR.018	BL.IR.013	0.0967689	9.67689
BK.IR.005	BL.IR.031	0.0967292	9.67292
BK.IR.019	WL.IR.014	0.0965937	9.65937
SY.IR.2.003	SY.LC.2.005	0.0957365	9.57365
EB.IR.002	EB.IR.009	0.0956302	9.56302
NZ.IR.009	NZ.LC.M+1.010	0.0954243	9.54243
EB.IR.009	EB.LC.002	0.0953947	9.53947
NZ.LC.M+1.009	NZ.LC.M+1.011	0.0951901	9.51901
BL.IR.034	WL.IR.016	0.0947825	9.47825
NZ.LC.001	NZ.LC.M+1.007	0.09385	9.385
EB.IR.005	EB.IR.008	0.0935138	9.35138
BL.IR.011	BL.IR.034	0.0934937	9.34937
NZ.IR.006	NZ.LC.001	0.0930004	9.30004
SY.IR.2.001	SY.LC.2.007	0.0926057	9.26057
NZ.IR.004	NZ.IR.007	0.0917883	9.17883
BK.IR.018	SY.IR.2.005	0.0916769	9.16769
BK.IR.014	SY.IR.2.002	0.091352	9.1352
BL.IR.016	WL.IR.014	0.0912458	9.12458
EB.IR.007	EB.IR.009	0.0912204	9.12204
BK.IR.008	BL.IR.003	0.0908609	9.08609
BK.IR.002	EB.LC.004	0.0903845	9.03845
BK.IR.020	BL.IR.013	0.0898164	8.98164
BK.IR.013	WL.IR.021	0.0896593	8.96593
BK.IR.001	BK.IR.005	0.0884929	8.84929
BK.IR.019	BL.IR.013	0.0879947	8.79947
BL.IR.014	SY.IR.2.001	0.0878389	8.78389
EB.IR.008	EB.LC.002	0.0873787	8.73787
EB.IR.001	EB.LC.003	0.0871428	8.71428
NZ.IR.007	NZ.LC.002	0.0870735	8.70735
BK.IR.008	BK.IR.018	0.0869378	8.69378
BL.IR.011	BL.IR.013	0.0869221	8.69221
BK.IR.010	BK.IR.013	0.0867676	8.67676
NZ.IR.007	NZ.IR.009	0.0864193	8.64193
NZ.IR.006	NZ.IR.007	0.086239	8.6239
SY.IR.2.003	SY.LC.2.004	0.0853749	8.53749
BK.IR.020	WL.IR.014	0.0850971	8.50971
BK.IR.005	EB.LC.004	0.0845987	8.45987
NZ.IR.002	NZ.IR.004	0.0837302	8.37302
BK.IR.019	BK.IR.020	0.0836451	8.36451
BL.IR.009	BL.IR.018	0.0836284	8.36284
BL.IR.014	SY.IR.2.002	0.0834532	8.34532
NZ.LC.006	NZ.LC.M+1.011	0.0833896	8.33896
SY.IR.2.003	SY.LC.2.001	0.0826846	8.26846
BK.IR.014	BL.IR.023	0.082478	8.2478
NZ.LC.M+1.007	NZ.LC.M+1.011	0.082165	8.2165
EB.IR.008	WL.IR.015	0.0814885	8.14885
SY.IR.2.001	SY.LC.2.003	0.081364	8.1364
BK.IR.006	BK.IR.013	0.0808756	8.08756
BK.IR.020	WL.IR.021	0.080797	8.0797
BK.IR.008	EB.LC.004	0.0803644	8.03644
BL.IR.014	SY.IR.2.003	0.0803386	8.03386
BK.IR.018	WL.IR.018	0.0801557	8.01557
EB.LC.004	NZ.LC.005	0.0797773	7.97773
EB.IR.004	EB.LC.008	0.0796896	7.96896
EB.IR.003	EB.LC.008	0.0791445	7.91445
BK.IR.014	WL.IR.018	0.0788442	7.88442
BK.IR.002	WL.IR.014	0.078778	7.8778
BK.IR.002	NZ.LC.005	0.0786916	7.86916
NZ.LC.001	NZ.LC.M+1.010	0.0784166	7.84166
BK.IR.010	BK.IR.014	0.0783271	7.83271
BL.IR.012	BL.IR.015	0.07769	7.769
BK.IR.005	BL.IR.013	0.0775802	7.75802
NZ.IR.007	NZ.LC.M+1.011	0.0772692	7.72692
BL.IR.034	NZ.LC.005	0.0772478	7.72478
BK.IR.005	BK.IR.008	0.0771552	7.71552
EB.LC.006	EB.LC.010	0.0770861	7.70861
BK.IR.007	BK.IR.020	0.0769956	7.69956
BK.IR.005	BK.IR.014	0.0765912	7.65912
NZ.IR.009	NZ.LC.002	0.0764221	7.64221
BK.IR.001	BK.IR.019	0.0761778	7.61778
SY.IR.2.001	SY.LC.2.002	0.0760706	7.60706
BK.IR.008	WL.IR.016	0.0758524	7.58524
BK.IR.018	BK.IR.019	0.0756848	7.56848
BK.IR.019	WL.IR.022	0.075372	7.5372
NZ.IR.002	NZ.LC.M+1.011	0.0745225	7.45225
NZ.IR.004	NZ.LC.001	0.0736668	7.36668
BK.IR.008	BK.IR.020	0.0733703	7.33703
BK.IR.005	WL.IR.014	0.0730698	7.30698
BL.IR.034	WL.IR.014	0.0729905	7.29905
BL.IR.016	WL.IR.020	0.0728001	7.28001
BK.IR.012	BK.IR.019	0.0727322	7.27322
SY.IR.2.002	SY.IR.2.004	0.0723089	7.23089
NZ.IR.008	NZ.LC.M+1.011	0.0722084	7.22084
BK.IR.002	BK.IR.019	0.0721824	7.21824
BK.IR.006	BL.IR.016	0.0721692	7.21692
NZ.IR.008	NZ.LC.M+1.007	0.0721108	7.21108
SY.IR.2.001	SY.LC.2.005	0.0720893	7.20893
BL.IR.031	WL.IR.021	0.072013	7.2013
EB.IR.007	EB.IR.008	0.0718628	7.18628
BK.IR.010	EB.LC.001	0.0715392	7.15392
NZ.LC.002	NZ.LC.M+1.007	0.0711925	7.11925
EB.LC.003	WL.IR.021	0.0711751	7.11751
BK.IR.014	BL.IR.012	0.0711166	7.11166
BK.IR.014	WL.IR.024	0.0710706	7.10706
NZ.LC.005	WL.IR.014	0.0709743	7.09743
EB.LC.004	WL.IR.021	0.0708723	7.08723
BL.IR.016	BL.IR.034	0.0708405	7.08405
BK.IR.008	BL.IR.031	0.0700005	7.00005
BK.IR.010	WL.IR.015	0.0694915	6.94915
BK.IR.006	BL.IR.033	0.0694051	6.94051
BK.IR.006	EB.LC.010	0.0692013	6.92013
NZ.IR.008	NZ.LC.M+1.010	0.0691105	6.91105
BK.IR.006	BK.IR.008	0.0690656	6.90656
EB.IR.004	EB.IR.007	0.0690211	6.90211
EB.LC.003	EB.LC.006	0.0688476	6.88476
NZ.LC.002	NZ.LC.005	0.068665	6.8665
SY.IR.2.003	SY.LC.2.006	0.0686394	6.86394
BK.IR.005	BL.IR.034	0.0683991	6.83991
SY.IR.2.001	SY.IR.2.004	0.0683959	6.83959
BL.IR.034	EB.LC.004	0.0682066	6.82066
NZ.IR.002	NZ.IR.005	0.0678066	6.78066
NZ.IR.006	NZ.LC.006	0.0677877	6.77877
EB.LC.003	WL.IR.011	0.0674881	6.74881
EB.IR.009	WL.IR.017	0.0674539	6.74539
BK.IR.018	NZ.LC.005	0.067428	6.7428
NZ.IR.002	NZ.LC.M+1.007	0.0673996	6.73996
BK.IR.008	WL.IR.024	0.0671779	6.71779
SY.IR.2.004	SY.LC.2.006	0.0671642	6.71642
BK.IR.006	EB.LC.001	0.0670551	6.70551
BK.IR.012	WL.IR.016	0.067014	6.7014
WL.IR.015	WL.IR.020	0.0667245	6.67245
EB.IR.001	EB.LC.006	0.066029	6.6029
BK.IR.002	BK.IR.008	0.0657905	6.57905
NZ.IR.011	WL.IR.017	0.0657895	6.57895
WL.IR.015	WL.IR.017	0.0656761	6.56761
EB.IR.004	WL.IR.005	0.065534	6.5534
EB.LC.004	WL.IR.014	0.0651438	6.51438
BL.IR.011	WL.IR.014	0.0649389	6.49389
BL.IR.009	SY.IR.2.005	0.0647854	6.47854
SY.LC.1.001	SY.LC.2.004	0.0647646	6.47646
BK.IR.014	NZ.LC.005	0.0643877	6.43877
NZ.IR.006	NZ.IR.009	0.0642407	6.42407
BK.IR.015	NZ.IR.007	0.0641809	6.41809
BL.IR.013	BL.IR.033	0.0641186	6.41186
EB.LC.006	WL.IR.015	0.0640674	6.40674
WL.IR.014	WL.IR.016	0.0637403	6.37403
BL.IR.033	NZ.IR.006	0.0637102	6.37102
BL.IR.016	EB.LC.003	0.0635825	6.35825
WL.IR.002	WL.IR.017	0.0635229	6.35229
BL.IR.001	BL.IR.023	0.0634048	6.34048
SY.IR.2.004	SY.LC.2.007	0.0633784	6.33784
BK.IR.013	EB.LC.004	0.0633537	6.33537
BK.IR.007	NZ.IR.006	0.0631938	6.31938
BK.IR.013	BL.IR.034	0.0624599	6.24599
EB.IR.008	EB.LC.008	0.0621879	6.21879
WL.IR.016	WL.IR.021	0.0615512	6.15512
BK.IR.013	WL.IR.014	0.0613163	6.13163
BL.IR.031	NZ.LC.005	0.0612844	6.12844
BK.IR.008	WL.IR.014	0.0612159	6.12159
BK.IR.020	WL.IR.016	0.0610313	6.10313
BL.IR.013	BL.IR.031	0.0609181	6.09181
BL.IR.031	BL.IR.034	0.0608456	6.08456
EB.IR.005	EB.IR.009	0.0607429	6.07429
EB.IR.001	EB.LC.008	0.0606346	6.06346
BK.IR.008	BL.IR.011	0.0606163	6.06163
BL.IR.031	WL.IR.016	0.0602176	6.02176
SY.LC.1.001	SY.LC.2.005	0.0602053	6.02053
NZ.IR.011	NZ.LC.M+1.009	0.059774	5.9774
BK.IR.005	BK.IR.020	0.0597266	5.97266
BK.IR.018	BL.IR.023	0.0597174	5.97174
BK.IR.013	BK.IR.018	0.0594228	5.94228
BK.IR.012	SY.IR.2.005	0.0594042	5.94042
BK.IR.018	WL.IR.016	0.059246	5.9246
BL.IR.011	WL.IR.016	0.0592198	5.92198
BK.IR.013	BL.IR.013	0.0590064	5.90064
BK.IR.008	EB.LC.001	0.0586177	5.86177
NZ.IR.002	SY.LC.1.015	0.058505	5.8505
BL.IR.011	WL.IR.021	0.0584828	5.84828
NZ.LC.001	NZ.LC.M+1.011	0.058401	5.8401
BL.IR.009	WL.IR.015	0.0583135	5.83135
BK.IR.013	BL.IR.031	0.05809	5.809
SY.IR.2.002	SY.LC.2.006	0.0580496	5.80496
SY.IR.2.002	SY.LC.2.007	0.0580077	5.80077
BK.IR.006	BK.IR.018	0.0580073	5.80073
NZ.IR.004	NZ.IR.008	0.0579989	5.79989
EB.IR.001	WL.IR.020	0.0579243	5.79243
BK.IR.007	BL.IR.012	0.0576747	5.76747
BK.IR.007	BK.IR.009	0.057601	5.7601
NZ.LC.M+1.007	NZ.LC.M+1.010	0.0575911	5.75911
BK.IR.005	WL.IR.021	0.0575034	5.75034
EB.IR.005	EB.LC.001	0.0574421	5.74421
WL.IR.016	WL.IR.024	0.0574356	5.74356
BK.IR.001	BK.IR.010	0.0573253	5.73253
BL.IR.013	BL.IR.023	0.0570387	5.70387
SY.LC.1.001	SY.LC.2.001	0.0568276	5.68276
EB.LC.006	WL.IR.020	0.0567612	5.67612
BK.IR.020	BL.IR.034	0.0565151	5.65151
BK.IR.014	NZ.IR.009	0.0564638	5.64638
EB.LC.004	EB.LC.010	0.05638	5.638
WL.IR.005	WL.IR.012	0.0562379	5.62379
WL.IR.012	WL.IR.025	0.0561983	5.61983
NZ.LC.M+1.009	SY.LC.1.003	0.0561403	5.61403
BK.IR.014	BK.IR.018	0.0559756	5.59756
BK.IR.014	NZ.IR.006	0.0559585	5.59585
WL.IR.002	WL.IR.005	0.0559027	5.59027
BK.IR.002	BL.IR.016	0.05575	5.575
NZ.IR.002	SY.LC.1.001	0.0556752	5.56752
BK.IR.019	WL.IR.021	0.055382	5.5382
BL.IR.013	EB.LC.004	0.0551479	5.51479
BK.IR.019	NZ.LC.002	0.0548916	5.48916
EB.IR.009	SY.LC.1.003	0.0545918	5.45918
NZ.IR.006	NZ.IR.011	0.0543841	5.43841
WL.IR.016	WL.IR.025	0.0540106	5.40106
BK.IR.010	EB.IR.005	0.0539856	5.39856
BL.IR.013	NZ.LC.005	0.0538408	5.38408
WL.IR.020	WL.IR.024	0.0536412	5.36412
SY.IR.2.005	SY.LC.1.011	0.0534726	5.34726
EB.LC.004	WL.IR.016	0.0533896	5.33896
NZ.LC.001	NZ.LC.002	0.0533337	5.33337
BK.IR.001	BK.IR.007	0.0529253	5.29253
BK.IR.010	WL.IR.025	0.0528831	5.28831
BK.IR.010	EB.LC.003	0.0528096	5.28096
SY.IR.2.004	WL.IR.015	0.052735	5.2735
NZ.IR.002	NZ.IR.008	0.0526233	5.26233
BK.IR.020	WL.IR.018	0.0524011	5.24011
SY.IR.2.003	SY.LC.1.003	0.0523312	5.23312
BK.IR.020	EB.LC.004	0.0521659	5.21659
BL.IR.009	EB.IR.009	0.0520361	5.20361
BK.IR.014	EB.LC.002	0.0519823	5.19823
BL.IR.013	WL.IR.020	0.0518781	5.18781
BL.IR.012	WL.IR.022	0.0516684	5.16684
BK.IR.008	SY.IR.2.005	0.0515489	5.15489
BL.IR.003	SY.IR.2.005	0.0514736	5.14736
BK.IR.002	BK.IR.012	0.0514548	5.14548
BK.IR.003	BK.IR.008	0.0513808	5.13808
NZ.IR.007	NZ.LC.M+1.007	0.051347	5.1347
WL.IR.011	WL.IR.016	0.0512426	5.12426
SY.LC.1.001	SY.LC.2.002	0.0511523	5.11523
EB.LC.006	WL.IR.012	0.0511444	5.11444
SY.IR.2.001	SY.LC.2.001	0.0510835	5.10835
BL.IR.030	BL.IR.034	0.0509396	5.09396
SY.IR.2.002	SY.IR.2.005	0.0508811	5.08811
BK.IR.018	BL.IR.032	0.050835	5.0835
NZ.IR.002	NZ.IR.009	0.050769	5.0769
BK.IR.020	BL.IR.031	0.0506405	5.06405
BL.IR.031	EB.LC.004	0.0504574	5.04574
BK.IR.010	BL.IR.015	0.0503989	5.03989
WL.IR.012	WL.IR.021	0.0503908	5.03908
EB.IR.009	EB.LC.008	0.0503618	5.03618
BL.IR.012	NZ.LC.005	0.0502519	5.02519
BK.IR.002	BL.IR.013	0.0500932	5.00932
EB.IR.007	WL.IR.024	0.0500506	5.00506
NZ.IR.002	NZ.LC.M+1.009	0.0498389	4.98389
BL.IR.011	EB.LC.004	0.0496731	4.96731
NZ.IR.011	SY.LC.1.003	0.0496526	4.96526
EB.IR.003	WL.IR.018	0.0492764	4.92764
BK.IR.019	BL.IR.031	0.0492609	4.92609
EB.IR.007	WL.IR.018	0.049192	4.9192
BK.IR.005	BK.IR.009	0.0490911	4.90911
BL.IR.014	BL.IR.034	0.0490161	4.90161
BK.IR.008	NZ.LC.005	0.0489373	4.89373
NZ.LC.005	WL.IR.021	0.0489092	4.89092
BK.IR.020	BL.IR.011	0.0488994	4.88994
BL.IR.031	WL.IR.024	0.0487801	4.87801
BK.IR.002	WL.IR.016	0.048487	4.8487
EB.IR.003	WL.IR.015	0.04831	4.831
EB.IR.009	EB.LC.006	0.048189	4.8189
EB.IR.001	NZ.LC.M+1.007	0.0480957	4.80957
WL.IR.014	WL.IR.020	0.0480896	4.80896
EB.LC.008	WL.IR.017	0.0480457	4.80457
BK.IR.006	BK.IR.020	0.0479467	4.79467
EB.LC.008	WL.IR.002	0.047801	4.7801
BL.IR.009	SY.LC.1.001	0.047737	4.7737
SY.IR.2.001	SY.LC.2.006	0.0477257	4.77257
EB.IR.002	EB.LC.008	0.0475053	4.75053
BK.IR.018	EB.IR.006	0.0474895	4.74895
BK.IR.010	NZ.LC.005	0.0471758	4.71758
NZ.IR.007	NZ.LC.001	0.0471179	4.71179
BK.IR.013	BL.IR.016	0.046887	4.6887
SY.LC.1.001	SY.LC.2.003	0.0465432	4.65432
NZ.IR.005	SY.IR.2.005	0.0463549	4.63549
NZ.LC.002	WL.IR.014	0.0461958	4.61958
NZ.IR.007	NZ.IR.011	0.0458843	4.58843
BL.IR.003	BL.IR.012	0.0458816	4.58816
BK.IR.002	BK.IR.015	0.0458586	4.58586
BK.IR.007	BK.IR.013	0.0456603	4.56603
BK.IR.008	BL.IR.016	0.0455387	4.55387
EB.IR.007	EB.LC.006	0.0454642	4.54642
BK.IR.007	NZ.LC.006	0.0454475	4.54475
BK.IR.018	BL.IR.011	0.0449583	4.49583
SY.IR.2.002	SY.LC.1.011	0.0448273	4.48273
NZ.IR.005	NZ.LC.M+1.007	0.0447992	4.47992
BL.IR.014	SY.LC.2.006	0.0447208	4.47208
EB.IR.001	NZ.IR.011	0.0445344	4.45344
EB.IR.001	WL.IR.017	0.044517	4.4517
BK.IR.001	BK.IR.020	0.0444251	4.44251
NZ.IR.007	NZ.LC.M+1.009	0.0443543	4.43543
SY.IR.2.004	SY.LC.1.003	0.0440504	4.40504
BL.IR.012	EB.LC.003	0.0438138	4.38138
EB.IR.001	EB.IR.008	0.0436841	4.36841
SY.IR.2.004	WL.IR.005	0.0433593	4.33593
EB.IR.001	EB.IR.007	0.0433023	4.33023
EB.LC.001	EB.LC.010	0.0432892	4.32892
EB.IR.006	EB.IR.007	0.0432425	4.32425
EB.IR.003	EB.IR.007	0.0427537	4.27537
NZ.LC.M+1.011	WL.IR.005	0.0426675	4.26675
BL.IR.016	WL.IR.016	0.0426446	4.26446
BK.IR.002	BK.IR.006	0.0426421	4.26421
NZ.IR.008	NZ.LC.001	0.0425204	4.25204
BK.IR.001	BK.IR.002	0.0423679	4.23679
SY.LC.1.001	WL.IR.015	0.0422544	4.22544
NZ.LC.005	WL.IR.003	0.0421724	4.21724
BL.IR.011	WL.IR.024	0.04212	4.212
BL.IR.013	WL.IR.018	0.0419867	4.19867
BK.IR.008	BL.IR.034	0.0417733	4.17733
BL.IR.031	WL.IR.014	0.0415975	4.15975
BK.IR.010	EB.LC.010	0.041596	4.1596
WL.IR.014	WL.IR.018	0.0415181	4.15181
BK.IR.005	BL.IR.033	0.041487	4.1487
EB.IR.009	SY.LC.1.015	0.0414139	4.14139
BK.IR.019	EB.LC.001	0.0413229	4.13229
EB.IR.002	WL.IR.003	0.0413139	4.13139
BK.IR.012	EB.IR.006	0.041256	4.1256
BK.IR.002	BL.IR.031	0.0411103	4.11103
BK.IR.001	BL.IR.018	0.0410414	4.10414
BK.IR.010	BK.IR.018	0.0409044	4.09044
EB.LC.010	WL.IR.025	0.0407427	4.07427
NZ.IR.009	NZ.LC.M+1.007	0.0406792	4.06792
BK.IR.005	BL.IR.016	0.0406267	4.06267
WL.IR.012	WL.IR.022	0.0403078	4.03078
WL.IR.003	WL.IR.017	0.040267	4.0267
SY.LC.1.001	SY.LC.1.015	0.0402228	4.02228
BK.IR.013	WL.IR.016	0.0401617	4.01617
EB.IR.006	EB.LC.002	0.0401029	4.01029
BL.IR.033	WL.IR.021	0.0400593	4.00593
BK.IR.008	WL.IR.021	0.0398957	3.98957
BK.IR.008	BK.IR.014	0.0398507	3.98507
BL.IR.015	WL.IR.001	0.0398174	3.98174
WL.IR.017	WL.IR.025	0.0396918	3.96918
BK.IR.014	BL.IR.034	0.0395887	3.95887
EB.IR.002	NZ.IR.011	0.0394063	3.94063
BL.IR.023	WL.IR.024	0.0393948	3.93948
WL.IR.001	WL.IR.020	0.0391548	3.91548
EB.IR.007	EB.LC.010	0.0390875	3.90875
BK.IR.006	BL.IR.031	0.0390256	3.90256
BK.IR.006	BL.IR.011	0.0389965	3.89965
WL.IR.005	WL.IR.022	0.0389034	3.89034
BK.IR.008	BK.IR.015	0.0388902	3.88902
EB.IR.001	SY.LC.1.003	0.0388414	3.88414
WL.IR.018	WL.IR.021	0.0387285	3.87285
BL.IR.018	WL.IR.024	0.0387013	3.87013
BL.IR.011	NZ.LC.005	0.0385466	3.85466
BL.IR.013	NZ.IR.009	0.0383541	3.83541
EB.LC.002	NZ.LC.001	0.0380977	3.80977
NZ.IR.004	NZ.LC.002	0.0380269	3.80269
BK.IR.003	SY.IR.2.004	0.037973	3.7973
EB.LC.004	WL.IR.018	0.0378276	3.78276
BL.IR.032	WL.IR.020	0.0377216	3.77216
BK.IR.012	NZ.LC.005	0.037661	3.7661
NZ.IR.004	NZ.LC.M+1.011	0.0374929	3.74929
EB.LC.001	NZ.LC.002	0.0374386	3.74386
WL.IR.024	WL.IR.025	0.0373216	3.73216
EB.IR.004	NZ.IR.011	0.0371469	3.71469
NZ.IR.005	SY.IR.2.003	0.037023	3.7023
BK.IR.012	WL.IR.005	0.0367946	3.67946
BL.IR.013	WL.IR.022	0.0367679	3.67679
BL.IR.003	SY.LC.1.011	0.0367344	3.67344
BK.IR.006	BL.IR.013	0.0365825	3.65825
BK.IR.005	NZ.LC.005	0.0365696	3.65696
BK.IR.010	SY.IR.2.004	0.0365682	3.65682
BK.IR.001	BL.IR.031	0.0365632	3.65632
EB.IR.008	WL.IR.002	0.0365033	3.65033
EB.LC.003	WL.IR.020	0.0364424	3.64424
EB.IR.005	SY.LC.1.003	0.0363954	3.63954
BK.IR.002	BL.IR.011	0.0360891	3.60891
EB.IR.001	EB.IR.009	0.0360749	3.60749
NZ.IR.008	SY.LC.2.002	0.0360735	3.60735
BK.IR.018	EB.IR.005	0.0360463	3.60463
BK.IR.013	NZ.LC.005	0.035906	3.5906
NZ.IR.011	NZ.LC.M+1.007	0.0358753	3.58753
NZ.LC.M+1.007	SY.LC.1.003	0.0358611	3.58611
WL.IR.002	WL.IR.015	0.0358137	3.58137
WL.IR.020	WL.IR.021	0.0357912	3.57912
BK.IR.002	WL.IR.021	0.0357701	3.57701
BK.IR.010	SY.IR.2.002	0.035653	3.5653
EB.IR.008	WL.IR.005	0.0355806	3.55806
BL.IR.013	EB.LC.010	0.0353563	3.53563
EB.IR.008	NZ.IR.011	0.035356	3.5356
NZ.IR.006	NZ.LC.M+1.011	0.0353554	3.53554
NZ.IR.002	NZ.IR.007	0.0353054	3.53054
BK.IR.005	BL.IR.011	0.0351013	3.51013
BK.IR.001	WL.IR.016	0.0350522	3.50522
BL.IR.012	SY.IR.2.004	0.0350468	3.50468
BL.IR.009	SY.IR.2.004	0.0349862	3.49862
BL.IR.033	EB.LC.004	0.034862	3.4862
EB.LC.010	WL.IR.012	0.0348207	3.48207
NZ.IR.004	SY.LC.1.001	0.0348113	3.48113
WL.IR.005	WL.IR.015	0.034652	3.4652
BL.IR.003	BL.IR.034	0.0345566	3.45566
BK.IR.012	BK.IR.013	0.0345431	3.45431
BK.IR.019	NZ.LC.005	0.0344856	3.44856
EB.IR.002	WL.IR.015	0.0342976	3.42976
BK.IR.008	WL.IR.001	0.0341785	3.41785
BK.IR.008	BL.IR.032	0.0341552	3.41552
BK.IR.019	BL.IR.016	0.0340601	3.40601
NZ.IR.008	SY.IR.2.003	0.0340481	3.40481
BK.IR.009	WL.IR.016	0.0340285	3.40285
BK.IR.002	WL.IR.018	0.0339661	3.39661
EB.LC.006	SY.LC.1.015	0.0339456	3.39456
EB.LC.001	EB.LC.003	0.0338129	3.38129
BK.IR.001	BK.IR.014	0.033766	3.3766
EB.IR.001	EB.IR.004	0.0337479	3.37479
BL.IR.011	BL.IR.014	0.0335466	3.35466
BL.IR.003	EB.IR.007	0.0335108	3.35108
EB.IR.003	WL.IR.002	0.0334706	3.34706
BK.IR.006	WL.IR.012	0.0333279	3.33279
NZ.LC.M+1.007	WL.IR.015	0.0332455	3.32455
NZ.IR.011	SY.LC.1.015	0.0332149	3.32149
BK.IR.012	WL.IR.003	0.032861	3.2861
SY.IR.2.005	SY.LC.1.003	0.0328364	3.28364
BK.IR.014	BL.IR.032	0.032677	3.2677
BL.IR.013	WL.IR.003	0.0326514	3.26514
BK.IR.005	WL.IR.016	0.0325625	3.25625
BK.IR.018	WL.IR.024	0.0324416	3.24416
BK.IR.003	WL.IR.015	0.0323739	3.23739
EB.IR.001	SY.LC.1.015	0.0323691	3.23691
BK.IR.002	NZ.LC.006	0.0323324	3.23324
BL.IR.014	SY.LC.2.007	0.0323081	3.23081
NZ.IR.002	SY.IR.2.003	0.0322336	3.22336
BK.IR.012	WL.IR.002	0.0321442	3.21442
BL.IR.012	WL.IR.024	0.0320989	3.20989
BL.IR.034	SY.IR.2.005	0.0319569	3.19569
EB.IR.002	EB.IR.006	0.0318825	3.18825
EB.IR.004	WL.IR.017	0.0318588	3.18588
EB.IR.005	WL.IR.014	0.0318001	3.18001
BL.IR.012	EB.IR.007	0.0317465	3.17465
BK.IR.014	SY.LC.1.011	0.0316849	3.16849
BK.IR.015	WL.IR.011	0.0315078	3.15078
BK.IR.015	NZ.LC.M+1.010	0.0313868	3.13868
BK.IR.005	WL.IR.020	0.031353	3.1353
BK.IR.008	BL.IR.033	0.031342	3.1342
BL.IR.034	WL.IR.020	0.0313193	3.13193
SY.LC.1.001	SY.LC.2.006	0.0312084	3.12084
EB.LC.006	WL.IR.017	0.0311128	3.11128
NZ.LC.002	WL.IR.021	0.0310507	3.10507
SY.IR.2.004	SY.LC.2.005	0.0310379	3.10379
EB.IR.006	EB.LC.008	0.0309576	3.09576
BL.IR.016	WL.IR.012	0.0309119	3.09119
EB.LC.004	WL.IR.011	0.0307384	3.07384
BL.IR.015	EB.IR.006	0.030721	3.0721
NZ.LC.M+1.009	SY.LC.1.001	0.0306963	3.06963
BK.IR.020	NZ.LC.005	0.0306425	3.06425
NZ.IR.004	WL.IR.005	0.030624	3.0624
BL.IR.009	SY.LC.1.015	0.0305917	3.05917
EB.LC.001	EB.LC.002	0.0305389	3.05389
NZ.LC.001	NZ.LC.005	0.0304933	3.04933
BK.IR.002	EB.LC.001	0.0304816	3.04816
NZ.IR.002	WL.IR.017	0.0304782	3.04782
BK.IR.001	BK.IR.018	0.0304674	3.04674
BK.IR.014	BL.IR.001	0.030464	3.0464
EB.IR.008	WL.IR.017	0.0303368	3.03368
BL.IR.001	BL.IR.018	0.0302742	3.02742
BK.IR.019	NZ.LC.006	0.0302582	3.02582
BK.IR.018	BL.IR.015	0.0302183	3.02183
BK.IR.007	BL.IR.013	0.0301919	3.01919
BL.IR.003	NZ.LC.005	0.030151	3.0151
EB.IR.004	EB.IR.005	0.0301126	3.01126
WL.IR.001	WL.IR.005	0.0300892	3.00892
BK.IR.014	NZ.LC.M+1.010	0.030045	3.0045
BK.IR.015	NZ.IR.009	0.030022	3.0022
BL.IR.015	EB.LC.004	0.0299856	2.99856
BK.IR.014	NZ.LC.002	0.0299463	2.99463
WL.IR.003	WL.IR.022	0.0297715	2.97715
BK.IR.001	BK.IR.009	0.029639	2.9639
BL.IR.016	NZ.LC.005	0.029496	2.9496
WL.IR.012	WL.IR.024	0.0293088	2.93088
SY.LC.1.003	WL.IR.017	0.0292909	2.92909
BK.IR.006	WL.IR.025	0.0289437	2.89437
BL.IR.009	NZ.LC.M+1.011	0.0288493	2.88493
BK.IR.014	SY.IR.2.001	0.0287683	2.87683
EB.LC.002	EB.LC.010	0.0287093	2.87093
BK.IR.019	WL.IR.016	0.0287078	2.87078
NZ.IR.004	WL.IR.017	0.0286942	2.86942
BK.IR.012	EB.IR.009	0.0286184	2.86184
BL.IR.001	BL.IR.016	0.0285913	2.85913
BL.IR.016	EB.LC.004	0.0284028	2.84028
BK.IR.006	NZ.LC.005	0.0283893	2.83893
EB.IR.004	WL.IR.018	0.0283764	2.83764
BK.IR.001	BK.IR.003	0.0282998	2.82998
BK.IR.007	SY.IR.2.005	0.0282603	2.82603
EB.IR.003	NZ.IR.004	0.0281795	2.81795
NZ.IR.007	NZ.LC.M+1.010	0.0281129	2.81129
EB.IR.004	WL.IR.002	0.0280547	2.80547
BK.IR.019	BL.IR.015	0.0280492	2.80492
NZ.IR.008	NZ.LC.006	0.0280426	2.80426
EB.LC.008	WL.IR.005	0.0280335	2.80335
BL.IR.013	WL.IR.001	0.0280226	2.80226
BK.IR.020	SY.LC.1.011	0.0279048	2.79048
NZ.LC.M+1.011	WL.IR.002	0.0278865	2.78865
BK.IR.009	EB.IR.006	0.0278326	2.78326
EB.IR.001	WL.IR.012	0.027732	2.7732
SY.IR.2.004	SY.LC.2.002	0.0277085	2.77085
BL.IR.034	WL.IR.011	0.027597	2.7597
WL.IR.003	WL.IR.020	0.0275128	2.75128
BK.IR.009	EB.LC.003	0.027469	2.7469
BK.IR.020	NZ.IR.007	0.0274579	2.74579
BL.IR.013	WL.IR.021	0.027442	2.7442
BK.IR.012	WL.IR.012	0.0274273	2.74273
NZ.LC.M+1.011	SY.IR.2.004	0.0273916	2.73916
BK.IR.018	EB.LC.004	0.0272438	2.72438
BL.IR.009	EB.IR.003	0.0272148	2.72148
BK.IR.019	BL.IR.023	0.0271911	2.71911
NZ.LC.M+1.007	SY.LC.1.015	0.0271443	2.71443
WL.IR.012	WL.IR.020	0.0271227	2.71227
NZ.IR.009	WL.IR.024	0.0270812	2.70812
BK.IR.009	BK.IR.015	0.0270107	2.70107
BK.IR.012	NZ.IR.005	0.0269808	2.69808
BK.IR.003	NZ.IR.011	0.0269578	2.69578
NZ.IR.005	NZ.LC.001	0.0269488	2.69488
BK.IR.010	SY.IR.2.005	0.0269161	2.69161
BL.IR.018	SY.IR.2.005	0.0268275	2.68275
BK.IR.019	WL.IR.024	0.026779	2.6779
BL.IR.009	EB.LC.002	0.0266876	2.66876
EB.LC.003	WL.IR.015	0.0266798	2.66798
BK.IR.015	NZ.LC.001	0.026607	2.6607
EB.IR.004	WL.IR.024	0.0265987	2.65987
EB.LC.008	NZ.IR.007	0.0265089	2.65089
BL.IR.003	EB.IR.005	0.0264965	2.64965
BL.IR.012	BL.IR.023	0.0263393	2.63393
BK.IR.003	NZ.IR.004	0.0263203	2.63203
BL.IR.003	EB.LC.004	0.0263143	2.63143
BK.IR.009	BK.IR.013	0.0263026	2.63026
EB.LC.001	WL.IR.024	0.0262585	2.62585
BL.IR.032	WL.IR.016	0.0262128	2.62128
NZ.IR.005	SY.IR.2.002	0.0261471	2.61471
BL.IR.034	WL.IR.005	0.0261459	2.61459
SY.IR.2.004	WL.IR.002	0.0260787	2.60787
BK.IR.009	BL.IR.016	0.0260718	2.60718
WL.IR.001	WL.IR.016	0.0260637	2.60637
WL.IR.003	WL.IR.012	0.0260258	2.60258
BK.IR.009	SY.LC.1.011	0.0260148	2.60148
BK.IR.006	BL.IR.003	0.025972	2.5972
EB.IR.009	NZ.IR.004	0.0259469	2.59469
EB.LC.008	NZ.LC.M+1.011	0.0259358	2.59358
BK.IR.018	WL.IR.014	0.0259298	2.59298
BL.IR.018	EB.IR.006	0.0258695	2.58695
BL.IR.015	WL.IR.011	0.0257443	2.57443
EB.IR.007	NZ.LC.M+1.007	0.0256921	2.56921
EB.LC.004	NZ.LC.006	0.0256381	2.56381
WL.IR.012	WL.IR.014	0.0255821	2.55821
NZ.IR.007	SY.LC.1.003	0.0255482	2.55482
BK.IR.002	BL.IR.003	0.0254923	2.54923
EB.IR.003	EB.LC.001	0.0254519	2.54519
BL.IR.009	EB.LC.006	0.0253557	2.53557
NZ.IR.002	NZ.LC.006	0.025323	2.5323
BL.IR.003	SY.LC.1.001	0.0253037	2.53037
BK.IR.020	WL.IR.011	0.0252191	2.52191
BK.IR.006	NZ.LC.002	0.0252089	2.52089
BK.IR.015	NZ.IR.006	0.0251805	2.51805
EB.IR.006	WL.IR.016	0.0251174	2.51174
BL.IR.003	WL.IR.011	0.0250857	2.50857
BL.IR.015	NZ.IR.005	0.0250163	2.50163
EB.IR.001	EB.LC.002	0.0249975	2.49975
WL.IR.003	WL.IR.011	0.0249729	2.49729
BL.IR.031	BL.IR.032	0.0249164	2.49164
BK.IR.009	BL.IR.013	0.0249144	2.49144
NZ.LC.M+1.007	WL.IR.005	0.0248332	2.48332
NZ.LC.M+1.007	SY.IR.2.004	0.024749	2.4749
SY.IR.2.001	SY.LC.2.004	0.0246783	2.46783
SY.IR.2.002	SY.LC.2.002	0.0246326	2.46326
BL.IR.032	NZ.LC.005	0.0246177	2.46177
BL.IR.014	WL.IR.002	0.0245854	2.45854
EB.LC.006	WL.IR.022	0.0245551	2.45551
BK.IR.007	BK.IR.008	0.0245429	2.45429
NZ.LC.002	WL.IR.024	0.0244943	2.44943
BK.IR.001	BK.IR.006	0.0244688	2.44688
EB.IR.002	WL.IR.017	0.0242783	2.42783
EB.IR.003	SY.IR.2.004	0.0242215	2.42215
NZ.LC.M+1.009	WL.IR.002	0.024214	2.4214
BK.IR.018	WL.IR.011	0.0241799	2.41799
BK.IR.009	EB.IR.001	0.0240986	2.40986
BK.IR.007	EB.LC.001	0.0240404	2.40404
EB.IR.007	EB.LC.008	0.0240143	2.40143
BL.IR.009	NZ.LC.M+1.007	0.0238961	2.38961
BL.IR.001	BL.IR.034	0.023874	2.3874
EB.IR.001	SY.IR.2.004	0.0238679	2.38679
EB.LC.008	SY.IR.2.003	0.0238009	2.38009
EB.IR.004	WL.IR.015	0.0237293	2.37293
BK.IR.002	WL.IR.001	0.0236931	2.36931
BK.IR.007	WL.IR.021	0.0236635	2.36635
NZ.IR.007	NZ.LC.005	0.0236105	2.36105
WL.IR.018	WL.IR.025	0.0235896	2.35896
BL.IR.033	NZ.LC.006	0.0235831	2.35831
BK.IR.010	WL.IR.022	0.0234515	2.34515
EB.IR.009	WL.IR.020	0.0234338	2.34338
BL.IR.015	WL.IR.014	0.0234003	2.34003
BL.IR.033	NZ.LC.005	0.0233858	2.33858
EB.IR.007	WL.IR.017	0.0233505	2.33505
BK.IR.019	EB.LC.004	0.0233252	2.33252
NZ.IR.009	WL.IR.014	0.0233139	2.33139
NZ.IR.004	NZ.LC.M+1.010	0.023265	2.3265
WL.IR.021	WL.IR.025	0.0232207	2.32207
BK.IR.002	NZ.IR.006	0.0230762	2.30762
EB.IR.006	EB.LC.004	0.0230352	2.30352
BK.IR.006	EB.LC.003	0.0230339	2.30339
BK.IR.002	BK.IR.009	0.0230088	2.30088
EB.LC.001	EB.LC.004	0.0229968	2.29968
BL.IR.018	EB.LC.002	0.0229944	2.29944
EB.IR.003	EB.IR.004	0.0229936	2.29936
BK.IR.010	NZ.IR.006	0.0229521	2.29521
SY.IR.2.003	SY.LC.1.015	0.0228486	2.28486
SY.IR.2.002	SY.LC.2.004	0.0227458	2.27458
BK.IR.013	EB.IR.006	0.0226977	2.26977
NZ.IR.002	NZ.IR.011	0.0226636	2.26636
EB.IR.002	WL.IR.016	0.0226597	2.26597
BL.IR.001	WL.IR.012	0.0225069	2.25069
NZ.IR.011	NZ.LC.M+1.011	0.0224651	2.24651
BK.IR.020	EB.LC.002	0.0224113	2.24113
SY.IR.2.004	SY.LC.1.015	0.0224102	2.24102
EB.IR.001	EB.LC.010	0.0222722	2.22722
WL.IR.001	WL.IR.017	0.0222375	2.22375
SY.LC.1.003	WL.IR.015	0.0222253	2.22253
NZ.IR.006	WL.IR.014	0.0221633	2.21633
WL.IR.011	WL.IR.017	0.0221475	2.21475
BK.IR.003	EB.IR.004	0.0220917	2.20917
NZ.LC.M+1.009	SY.IR.2.003	0.0220729	2.20729
EB.LC.008	NZ.IR.004	0.0220071	2.20071
BL.IR.009	WL.IR.011	0.022002	2.2002
NZ.IR.002	SY.LC.1.003	0.0218702	2.18702
NZ.LC.M+1.010	WL.IR.022	0.0218429	2.18429
WL.IR.012	WL.IR.015	0.0218273	2.18273
WL.IR.021	WL.IR.024	0.0217722	2.17722
BL.IR.031	WL.IR.011	0.0217535	2.17535
BK.IR.009	WL.IR.021	0.0217389	2.17389
NZ.IR.008	SY.LC.2.003	0.0216657	2.16657
NZ.LC.M+1.011	WL.IR.015	0.0216081	2.16081
NZ.LC.M+1.009	WL.IR.017	0.0215423	2.15423
EB.LC.010	WL.IR.014	0.0214464	2.14464
BK.IR.006	EB.LC.004	0.0213557	2.13557
BK.IR.006	NZ.LC.006	0.0212798	2.12798
BK.IR.010	BL.IR.009	0.0212237	2.12237
EB.LC.006	WL.IR.005	0.0210964	2.10964
BL.IR.033	NZ.IR.004	0.021012	2.1012
BL.IR.032	WL.IR.022	0.0209752	2.09752
EB.IR.006	WL.IR.021	0.0209486	2.09486
WL.IR.003	WL.IR.024	0.020919	2.0919
NZ.LC.001	WL.IR.021	0.0208808	2.08808
BK.IR.020	BL.IR.012	0.0208586	2.08586
EB.LC.002	EB.LC.006	0.0206452	2.06452
BK.IR.001	WL.IR.021	0.0205862	2.05862
EB.LC.006	SY.LC.1.003	0.020578	2.0578
EB.LC.003	WL.IR.012	0.020568	2.0568
BK.IR.009	WL.IR.003	0.0205189	2.05189
EB.IR.002	WL.IR.022	0.0204757	2.04757
BK.IR.014	EB.LC.003	0.0204566	2.04566
BK.IR.001	BL.IR.015	0.0203639	2.03639
BK.IR.012	BL.IR.015	0.0203201	2.03201
BK.IR.008	BL.IR.001	0.0203153	2.03153
EB.LC.004	WL.IR.001	0.0202558	2.02558
BL.IR.009	WL.IR.025	0.0202339	2.02339
BL.IR.034	WL.IR.001	0.0201908	2.01908
BK.IR.010	NZ.IR.004	0.0201722	2.01722
NZ.LC.005	WL.IR.016	0.0201685	2.01685
BL.IR.015	WL.IR.025	0.0201563	2.01563
EB.IR.007	WL.IR.012	0.0200457	2.00457
BL.IR.023	WL.IR.025	0.020022	2.0022
BK.IR.020	NZ.LC.001	0.0200159	2.00159
EB.IR.009	WL.IR.015	0.0200072	2.00072
BK.IR.005	BL.IR.012	0.0199932	1.99932
SY.IR.2.001	SY.LC.1.011	0.0199859	1.99859
NZ.IR.009	NZ.LC.005	0.019949	1.9949
EB.LC.010	NZ.LC.002	0.0199339	1.99339
BL.IR.032	WL.IR.012	0.0199268	1.99268
EB.IR.009	NZ.IR.007	0.0199119	1.99119
NZ.IR.005	NZ.LC.006	0.0198834	1.98834
BK.IR.008	WL.IR.022	0.0198331	1.98331
BL.IR.003	WL.IR.018	0.0197959	1.97959
BL.IR.032	WL.IR.025	0.0197942	1.97942
EB.LC.001	NZ.IR.004	0.0197908	1.97908
WL.IR.003	WL.IR.018	0.0197648	1.97648
BL.IR.032	EB.LC.004	0.0197537	1.97537
BK.IR.019	WL.IR.012	0.0197526	1.97526
BK.IR.018	BL.IR.016	0.0196165	1.96165
BK.IR.010	WL.IR.016	0.0195939	1.95939
BL.IR.009	WL.IR.003	0.0195286	1.95286
NZ.LC.005	WL.IR.011	0.0195167	1.95167
EB.IR.008	EB.LC.006	0.0194773	1.94773
BL.IR.013	EB.IR.006	0.0193629	1.93629
WL.IR.001	WL.IR.015	0.0193626	1.93626
EB.IR.009	NZ.IR.011	0.0193514	1.93514
NZ.IR.005	NZ.LC.005	0.0193099	1.93099
BL.IR.032	WL.IR.024	0.0192741	1.92741
EB.LC.003	WL.IR.003	0.0192374	1.92374
BL.IR.018	SY.LC.1.001	0.0191822	1.91822
EB.IR.006	NZ.LC.M+1.007	0.0189636	1.89636
BL.IR.033	EB.LC.010	0.0189026	1.89026
BK.IR.003	NZ.LC.M+1.009	0.0188174	1.88174
BK.IR.002	BL.IR.012	0.0187936	1.87936
NZ.IR.007	WL.IR.025	0.0187754	1.87754
EB.IR.001	EB.LC.001	0.0186952	1.86952
EB.LC.010	NZ.LC.001	0.0186862	1.86862
NZ.IR.002	SY.LC.2.004	0.0186813	1.86813
BK.IR.020	NZ.IR.006	0.0186559	1.86559
BK.IR.008	WL.IR.025	0.0185954	1.85954
BL.IR.032	WL.IR.021	0.0185771	1.85771
NZ.LC.M+1.010	SY.IR.2.002	0.0185584	1.85584
BK.IR.001	BL.IR.003	0.0185565	1.85565
NZ.IR.008	SY.LC.1.003	0.0185151	1.85151
BK.IR.001	WL.IR.003	0.018482	1.8482
NZ.IR.004	WL.IR.002	0.0184648	1.84648
WL.IR.005	WL.IR.017	0.0184479	1.84479
BL.IR.015	EB.LC.001	0.0184475	1.84475
SY.IR.2.004	WL.IR.017	0.0184368	1.84368
BK.IR.008	BK.IR.009	0.0182839	1.82839
BK.IR.010	BL.IR.013	0.0181495	1.81495
BK.IR.012	EB.LC.003	0.0180796	1.80796
BK.IR.001	WL.IR.014	0.0180604	1.80604
EB.IR.007	WL.IR.015	0.0180081	1.80081
BK.IR.005	EB.LC.001	0.0179917	1.79917
SY.IR.2.004	WL.IR.012	0.017981	1.7981
WL.IR.016	WL.IR.018	0.0179499	1.79499
EB.LC.003	WL.IR.016	0.017888	1.7888
BL.IR.009	EB.IR.004	0.0177943	1.77943
EB.IR.008	NZ.IR.002	0.0177922	1.77922
BL.IR.032	BL.IR.034	0.0177826	1.77826
BK.IR.006	WL.IR.020	0.0177783	1.77783
EB.IR.003	WL.IR.017	0.0177521	1.77521
BL.IR.033	WL.IR.002	0.0177367	1.77367
NZ.IR.011	NZ.LC.001	0.0177306	1.77306
EB.IR.001	NZ.IR.004	0.0177025	1.77025
BL.IR.003	WL.IR.016	0.0177014	1.77014
BL.IR.018	BL.IR.033	0.0176786	1.76786
EB.LC.010	WL.IR.001	0.017666	1.7666
EB.LC.008	NZ.IR.002	0.0176251	1.76251
BK.IR.013	BL.IR.033	0.017606	1.7606
BK.IR.009	WL.IR.015	0.0175937	1.75937
EB.IR.008	SY.IR.2.004	0.0175906	1.75906
EB.IR.005	NZ.IR.011	0.0175259	1.75259
EB.IR.004	NZ.IR.004	0.017522	1.7522
EB.LC.003	EB.LC.010	0.0175202	1.75202
BK.IR.001	NZ.LC.001	0.0174539	1.74539
EB.LC.003	WL.IR.022	0.0174361	1.74361
BL.IR.009	NZ.IR.011	0.017386	1.7386
EB.LC.006	NZ.IR.004	0.0173595	1.73595
BK.IR.013	NZ.LC.001	0.0173504	1.73504
BL.IR.031	SY.LC.1.011	0.0173485	1.73485
EB.IR.005	WL.IR.011	0.0173065	1.73065
EB.IR.005	WL.IR.016	0.01726	1.726
BK.IR.001	BL.IR.030	0.0172491	1.72491
BK.IR.006	BK.IR.019	0.0171515	1.71515
BK.IR.020	EB.LC.001	0.0170608	1.70608
EB.IR.009	WL.IR.025	0.0170538	1.70538
NZ.LC.M+1.007	NZ.LC.M+1.009	0.0170485	1.70485
BK.IR.003	SY.IR.2.003	0.0170011	1.70011
NZ.IR.008	SY.LC.2.004	0.016982	1.6982
BK.IR.018	WL.IR.005	0.0169781	1.69781
BK.IR.006	WL.IR.018	0.0169428	1.69428
BK.IR.012	BL.IR.034	0.0168981	1.68981
EB.LC.008	SY.LC.2.004	0.0168031	1.68031
BL.IR.012	EB.IR.005	0.0167294	1.67294
NZ.IR.011	NZ.LC.006	0.0166319	1.66319
BL.IR.033	WL.IR.014	0.0164866	1.64866
EB.LC.010	WL.IR.011	0.0164508	1.64508
EB.IR.005	WL.IR.017	0.0164224	1.64224
EB.LC.008	NZ.LC.M+1.009	0.01642	1.642
BL.IR.015	NZ.LC.002	0.0164197	1.64197
EB.LC.008	WL.IR.018	0.0163695	1.63695
BL.IR.011	NZ.IR.005	0.0163551	1.63551
SY.LC.1.015	SY.LC.2.002	0.0162352	1.62352
NZ.IR.005	NZ.IR.009	0.0162018	1.62018
WL.IR.020	WL.IR.025	0.0161642	1.61642
BK.IR.018	BL.IR.031	0.0161436	1.61436
BL.IR.015	BL.IR.033	0.0161199	1.61199
BL.IR.015	WL.IR.022	0.0160606	1.60606
EB.IR.008	NZ.IR.007	0.0159972	1.59972
SY.LC.1.015	SY.LC.2.004	0.0159849	1.59849
BL.IR.015	BL.IR.018	0.0159705	1.59705
BK.IR.003	NZ.LC.M+1.011	0.0158384	1.58384
SY.LC.1.003	SY.LC.1.011	0.0158339	1.58339
EB.IR.004	SY.LC.1.003	0.0156408	1.56408
EB.LC.006	EB.LC.008	0.0156342	1.56342
NZ.IR.005	NZ.IR.011	0.0155786	1.55786
WL.IR.016	WL.IR.020	0.015569	1.5569
SY.LC.1.001	SY.LC.1.003	0.0155351	1.55351
BK.IR.003	NZ.IR.008	0.015502	1.5502
BL.IR.009	EB.IR.002	0.0154186	1.54186
BL.IR.011	BL.IR.032	0.0154058	1.54058
NZ.LC.005	SY.IR.2.002	0.0152642	1.52642
EB.IR.002	WL.IR.001	0.0152398	1.52398
BK.IR.007	BK.IR.018	0.0152337	1.52337
BL.IR.009	NZ.IR.007	0.0151349	1.51349
EB.LC.008	NZ.IR.011	0.0150247	1.50247
BK.IR.014	NZ.IR.007	0.0150191	1.50191
WL.IR.005	WL.IR.020	0.0149601	1.49601
EB.LC.001	WL.IR.014	0.0149228	1.49228
NZ.LC.002	WL.IR.016	0.014907	1.4907
NZ.LC.002	WL.IR.012	0.0148847	1.48847
EB.IR.003	NZ.LC.006	0.0148355	1.48355
BK.IR.008	BL.IR.012	0.01471	1.471
BL.IR.034	NZ.LC.006	0.0146954	1.46954
BK.IR.019	WL.IR.025	0.0146884	1.46884
WL.IR.001	WL.IR.002	0.0146853	1.46853
BK.IR.015	WL.IR.017	0.0146766	1.46766
BK.IR.020	BL.IR.014	0.0146759	1.46759
WL.IR.011	WL.IR.018	0.014644	1.4644
NZ.IR.004	SY.LC.2.004	0.014638	1.4638
BK.IR.019	BL.IR.011	0.0146039	1.46039
BL.IR.033	NZ.IR.005	0.0146013	1.46013
EB.IR.001	SY.IR.2.003	0.0146011	1.46011
BK.IR.003	EB.LC.008	0.014586	1.4586
EB.LC.002	WL.IR.014	0.0145179	1.45179
BK.IR.001	BK.IR.015	0.0145059	1.45059
BL.IR.023	EB.IR.007	0.0144916	1.44916
BL.IR.003	WL.IR.003	0.0144324	1.44324
BK.IR.007	BL.IR.023	0.0143849	1.43849
BK.IR.012	BK.IR.015	0.0143831	1.43831
BL.IR.030	WL.IR.024	0.0143699	1.43699
EB.LC.003	WL.IR.024	0.0143595	1.43595
EB.IR.007	SY.LC.1.003	0.0143555	1.43555
BK.IR.006	SY.LC.1.011	0.0143125	1.43125
BL.IR.023	EB.LC.006	0.0143097	1.43097
BK.IR.010	NZ.LC.001	0.0143083	1.43083
BL.IR.012	WL.IR.018	0.0142961	1.42961
BK.IR.005	WL.IR.011	0.0142207	1.42207
EB.IR.001	NZ.IR.007	0.0141097	1.41097
WL.IR.003	WL.IR.016	0.0141013	1.41013
BL.IR.001	WL.IR.011	0.0140941	1.40941
BL.IR.015	NZ.LC.M+1.009	0.0140573	1.40573
BK.IR.005	BL.IR.030	0.0140312	1.40312
BK.IR.006	EB.IR.001	0.0140244	1.40244
EB.IR.005	WL.IR.015	0.0140044	1.40044
BK.IR.003	BL.IR.009	0.0139797	1.39797
BL.IR.012	NZ.LC.002	0.0139536	1.39536
EB.LC.001	WL.IR.005	0.0138771	1.38771
BK.IR.012	BL.IR.033	0.0138454	1.38454
BK.IR.006	BL.IR.012	0.0137789	1.37789
EB.IR.007	NZ.LC.002	0.0137635	1.37635
BK.IR.018	WL.IR.003	0.0137393	1.37393
EB.IR.001	NZ.IR.002	0.0136876	1.36876
BK.IR.009	SY.LC.1.015	0.0136872	1.36872
BK.IR.006	BL.IR.014	0.0136557	1.36557
BK.IR.019	BL.IR.018	0.0135985	1.35985
WL.IR.001	WL.IR.025	0.0135899	1.35899
EB.LC.002	WL.IR.017	0.0135854	1.35854
EB.LC.004	WL.IR.003	0.0135693	1.35693
SY.LC.1.015	WL.IR.017	0.0135624	1.35624
SY.LC.1.015	SY.LC.2.005	0.0135289	1.35289
BK.IR.019	WL.IR.020	0.0135146	1.35146
BK.IR.019	EB.LC.006	0.0134865	1.34865
BK.IR.007	SY.LC.2.004	0.0134828	1.34828
NZ.IR.002	WL.IR.005	0.0134818	1.34818
EB.IR.008	EB.LC.001	0.0134815	1.34815
EB.IR.004	EB.IR.008	0.0134185	1.34185
BK.IR.010	NZ.LC.002	0.0133757	1.33757
BK.IR.013	NZ.IR.006	0.0133645	1.33645
BK.IR.018	NZ.IR.006	0.0133574	1.33574
BL.IR.003	WL.IR.014	0.0132271	1.32271
EB.IR.001	EB.IR.002	0.0132269	1.32269
EB.IR.006	WL.IR.005	0.0131996	1.31996
EB.IR.002	WL.IR.002	0.013197	1.3197
BL.IR.001	BL.IR.003	0.0131938	1.31938
EB.IR.002	WL.IR.012	0.0131922	1.31922
BK.IR.010	WL.IR.017	0.0131683	1.31683
EB.LC.002	WL.IR.018	0.0131503	1.31503
EB.LC.002	WL.IR.022	0.0131249	1.31249
EB.IR.006	WL.IR.001	0.0130944	1.30944
SY.IR.2.002	SY.LC.2.003	0.0130785	1.30785
WL.IR.011	WL.IR.024	0.0130231	1.30231
BK.IR.002	BK.IR.010	0.013022	1.3022
BK.IR.015	NZ.IR.002	0.0130208	1.30208
SY.LC.1.001	SY.LC.2.007	0.0129712	1.29712
BL.IR.018	SY.LC.1.011	0.0129442	1.29442
EB.LC.008	SY.LC.1.015	0.0129107	1.29107
BL.IR.016	NZ.IR.005	0.012907	1.2907
WL.IR.011	WL.IR.025	0.0127301	1.27301
EB.LC.003	EB.LC.004	0.0127125	1.27125
EB.LC.003	WL.IR.018	0.0126891	1.26891
BK.IR.014	EB.IR.007	0.0126286	1.26286
BK.IR.013	NZ.IR.007	0.0125601	1.25601
BL.IR.023	WL.IR.020	0.0125392	1.25392
BK.IR.006	BL.IR.015	0.0125323	1.25323
NZ.IR.006	NZ.LC.M+1.007	0.0125059	1.25059
NZ.IR.004	SY.LC.1.015	0.0124928	1.24928
NZ.IR.004	NZ.IR.011	0.0124868	1.24868
NZ.IR.002	SY.LC.2.003	0.0124732	1.24732
EB.IR.009	WL.IR.005	0.012471	1.2471
BK.IR.006	BL.IR.023	0.0124552	1.24552
NZ.IR.002	SY.LC.2.002	0.0124504	1.24504
NZ.IR.004	NZ.LC.M+1.007	0.0124451	1.24451
EB.IR.004	NZ.LC.M+1.011	0.0124078	1.24078
BL.IR.018	EB.IR.003	0.0123918	1.23918
EB.LC.006	NZ.LC.M+1.009	0.0123695	1.23695
NZ.IR.006	NZ.LC.002	0.0123664	1.23664
BK.IR.008	EB.IR.006	0.0123596	1.23596
BL.IR.033	WL.IR.005	0.0123434	1.23434
EB.IR.004	SY.LC.1.015	0.0123278	1.23278
BK.IR.008	BL.IR.023	0.0123202	1.23202
BK.IR.003	NZ.LC.002	0.0123045	1.23045
BK.IR.001	EB.IR.004	0.0122836	1.22836
WL.IR.011	WL.IR.021	0.0122796	1.22796
EB.IR.002	SY.LC.1.003	0.0122735	1.22735
EB.IR.007	WL.IR.002	0.0122703	1.22703
BL.IR.011	EB.LC.001	0.0122322	1.22322
NZ.IR.009	SY.LC.1.011	0.0122322	1.22322
BL.IR.001	EB.LC.004	0.0121458	1.21458
WL.IR.012	WL.IR.016	0.0121259	1.21259
BL.IR.009	EB.LC.003	0.0121112	1.21112
EB.IR.007	NZ.LC.001	0.012089	1.2089
WL.IR.003	WL.IR.025	0.0120208	1.20208
BK.IR.010	BL.IR.023	0.0119086	1.19086
BK.IR.018	BL.IR.030	0.0119018	1.19018
SY.LC.1.015	WL.IR.015	0.0118982	1.18982
EB.IR.004	WL.IR.022	0.0118764	1.18764
EB.LC.001	WL.IR.016	0.0118643	1.18643
BL.IR.001	EB.IR.004	0.0118396	1.18396
BL.IR.014	BL.IR.016	0.0117662	1.17662
NZ.LC.M+1.009	SY.IR.2.004	0.01176	1.176
BK.IR.003	SY.IR.2.005	0.0117317	1.17317
BK.IR.018	BL.IR.001	0.0117154	1.17154
EB.IR.009	SY.IR.2.004	0.0116996	1.16996
BL.IR.023	WL.IR.005	0.0116984	1.16984
BL.IR.001	NZ.IR.008	0.0116747	1.16747
BK.IR.001	SY.IR.2.005	0.0116733	1.16733
EB.IR.001	WL.IR.024	0.0116599	1.16599
EB.IR.003	WL.IR.001	0.0116319	1.16319
BK.IR.001	NZ.IR.006	0.0116224	1.16224
BK.IR.014	BL.IR.011	0.0116078	1.16078
NZ.IR.011	WL.IR.015	0.0115921	1.15921
NZ.LC.005	NZ.LC.006	0.0115379	1.15379
NZ.IR.009	NZ.LC.001	0.0115372	1.15372
EB.LC.002	WL.IR.024	0.011462	1.1462
NZ.LC.M+1.009	SY.LC.1.015	0.0114413	1.14413
BK.IR.013	BL.IR.015	0.0114115	1.14115
BK.IR.003	NZ.IR.007	0.0113897	1.13897
BL.IR.014	WL.IR.014	0.0113888	1.13888
BK.IR.003	NZ.IR.002	0.0113793	1.13793
EB.LC.001	WL.IR.012	0.0113657	1.13657
EB.IR.009	NZ.LC.M+1.011	0.0113621	1.13621
BL.IR.011	WL.IR.011	0.0113072	1.13072
EB.IR.007	SY.LC.1.001	0.0113005	1.13005
BK.IR.006	BL.IR.034	0.0112531	1.12531
EB.IR.007	NZ.LC.M+1.011	0.0111994	1.11994
BK.IR.003	NZ.LC.006	0.0111709	1.11709
BK.IR.018	EB.LC.001	0.0111322	1.11322
EB.LC.002	WL.IR.025	0.0111278	1.11278
BL.IR.018	WL.IR.001	0.0111081	1.11081
BL.IR.032	WL.IR.011	0.0110375	1.10375
BK.IR.007	BK.IR.012	0.0110202	1.10202
NZ.IR.006	WL.IR.016	0.011002	1.1002
NZ.IR.002	SY.LC.2.001	0.010983	1.0983
BL.IR.009	WL.IR.002	0.0109794	1.09794
EB.LC.001	NZ.LC.005	0.0109186	1.09186
BK.IR.010	SY.LC.1.011	0.0108901	1.08901
WL.IR.011	WL.IR.012	0.0108836	1.08836
EB.IR.005	WL.IR.002	0.0108758	1.08758
BK.IR.002	NZ.LC.002	0.0108582	1.08582
EB.LC.004	WL.IR.022	0.0107896	1.07896
BL.IR.023	WL.IR.016	0.0107796	1.07796
BK.IR.018	BL.IR.012	0.0107723	1.07723
BK.IR.020	EB.IR.006	0.010748	1.0748
BK.IR.009	NZ.LC.002	0.0107454	1.07454
BK.IR.008	WL.IR.003	0.01073	1.073
BK.IR.009	WL.IR.014	0.0107035	1.07035
EB.LC.003	WL.IR.014	0.010695	1.0695
BK.IR.007	BL.IR.003	0.0106721	1.06721
EB.LC.002	WL.IR.001	0.0106561	1.06561
BK.IR.019	EB.LC.010	0.0106393	1.06393
BL.IR.013	BL.IR.016	0.0105579	1.05579
BL.IR.003	BL.IR.018	0.0104998	1.04998
BK.IR.013	BL.IR.011	0.0104807	1.04807
BK.IR.005	BK.IR.007	0.0104426	1.04426
BL.IR.033	NZ.IR.002	0.0103824	1.03824
BL.IR.001	BL.IR.011	0.0103624	1.03624
BL.IR.012	NZ.IR.005	0.0103397	1.03397
NZ.LC.M+1.011	WL.IR.022	0.0102978	1.02978
NZ.IR.005	WL.IR.005	0.0102493	1.02493
SY.LC.1.011	SY.LC.2.004	0.0102466	1.02466
SY.IR.2.001	SY.IR.2.005	0.0102044	1.02044
BK.IR.003	WL.IR.017	0.0101172	1.01172
BL.IR.013	NZ.LC.002	0.0100865	1.00865
BL.IR.018	WL.IR.016	0.0100779	1.00779
BL.IR.009	NZ.LC.002	0.010011	1.0011
SY.LC.1.011	WL.IR.018	0.0100055	1.00055
BK.IR.009	SY.IR.2.005	0.00996747	0.996747
EB.IR.001	NZ.LC.M+1.011	0.00995423	0.995423
NZ.IR.009	NZ.LC.006	0.0099486	0.99486
BK.IR.001	WL.IR.011	0.00992598	0.992598
NZ.IR.011	NZ.LC.002	0.00991627	0.991627
BK.IR.010	BL.IR.034	0.00988214	0.988214
EB.IR.007	WL.IR.005	0.00983857	0.983857
BL.IR.015	WL.IR.021	0.00982361	0.982361
BK.IR.010	WL.IR.003	0.00980752	0.980752
BL.IR.012	WL.IR.011	0.00977394	0.977394
NZ.IR.007	SY.LC.1.015	0.00976001	0.976001
BK.IR.009	BL.IR.033	0.00974381	0.974381
BK.IR.019	SY.IR.2.005	0.00973514	0.973514
BK.IR.008	BL.IR.014	0.00973078	0.973078
EB.IR.009	WL.IR.011	0.00971431	0.971431
BL.IR.009	SY.LC.1.003	0.00960464	0.960464
NZ.IR.005	SY.IR.2.001	0.00958163	0.958163
BK.IR.002	BL.IR.015	0.00953647	0.953647
BL.IR.018	BL.IR.032	0.00952371	0.952371
NZ.IR.009	WL.IR.025	0.00949479	0.949479
EB.IR.008	WL.IR.001	0.00946942	0.946942
BK.IR.009	EB.LC.010	0.00942921	0.942921
BK.IR.005	WL.IR.018	0.00937253	0.937253
NZ.LC.M+1.011	WL.IR.017	0.00932477	0.932477
WL.IR.022	WL.IR.025	0.00927284	0.927284
BK.IR.014	WL.IR.012	0.00924006	0.924006
EB.IR.006	EB.IR.009	0.00921596	0.921596
BL.IR.033	WL.IR.020	0.0092016	0.92016
EB.IR.003	NZ.IR.002	0.00917027	0.917027
BK.IR.012	WL.IR.014	0.00916786	0.916786
BK.IR.013	BL.IR.032	0.00913472	0.913472
BL.IR.009	BL.IR.023	0.00902812	0.902812
BK.IR.008	BK.IR.012	0.00898438	0.898438
BL.IR.009	WL.IR.020	0.0089671	0.89671
EB.IR.003	NZ.LC.M+1.007	0.00894042	0.894042
BK.IR.006	NZ.IR.004	0.00891948	0.891948
BL.IR.015	NZ.LC.005	0.00883887	0.883887
EB.IR.004	NZ.IR.002	0.00878593	0.878593
BK.IR.009	BL.IR.031	0.00875227	0.875227
SY.IR.2.002	SY.LC.1.001	0.00872642	0.872642
EB.IR.003	EB.LC.006	0.00861919	0.861919
BK.IR.008	NZ.IR.005	0.00854731	0.854731
BL.IR.012	WL.IR.016	0.00853891	0.853891
BK.IR.005	EB.IR.006	0.00847176	0.847176
EB.LC.004	SY.IR.2.005	0.00842125	0.842125
NZ.IR.011	SY.IR.2.003	0.00840871	0.840871
WL.IR.011	WL.IR.015	0.0083838	0.83838
BL.IR.033	WL.IR.016	0.00831394	0.831394
BK.IR.020	EB.LC.010	0.00831143	0.831143
BL.IR.011	EB.IR.006	0.00829267	0.829267
BK.IR.003	EB.LC.006	0.00828329	0.828329
EB.IR.005	WL.IR.020	0.00825909	0.825909
BL.IR.034	NZ.IR.005	0.00824745	0.824745
EB.LC.008	WL.IR.001	0.00822729	0.822729
EB.IR.001	WL.IR.005	0.00821385	0.821385
BK.IR.010	EB.LC.004	0.00820215	0.820215
SY.LC.1.011	SY.LC.1.015	0.00813977	0.813977
BL.IR.033	EB.IR.006	0.00812956	0.812956
BL.IR.013	EB.LC.002	0.00805322	0.805322
EB.IR.004	EB.IR.009	0.00804256	0.804256
BK.IR.012	EB.IR.005	0.00801165	0.801165
BK.IR.007	WL.IR.022	0.00800998	0.800998
BK.IR.013	BL.IR.030	0.00792725	0.792725
NZ.IR.002	SY.LC.2.007	0.00791312	0.791312
NZ.LC.M+1.011	SY.IR.2.003	0.0078881	0.78881
BK.IR.020	WL.IR.001	0.00788182	0.788182
EB.IR.004	NZ.LC.M+1.007	0.00782353	0.782353
NZ.IR.004	SY.LC.1.003	0.00782101	0.782101
EB.IR.006	WL.IR.003	0.00780429	0.780429
BK.IR.015	EB.IR.006	0.00780068	0.780068
BK.IR.014	BL.IR.009	0.00772623	0.772623
NZ.LC.005	SY.IR.2.001	0.00771375	0.771375
BL.IR.009	WL.IR.005	0.00769472	0.769472
BK.IR.001	BK.IR.008	0.00768659	0.768659
BL.IR.003	BL.IR.011	0.00766542	0.766542
NZ.IR.009	WL.IR.003	0.00760561	0.760561
BL.IR.001	SY.LC.2.005	0.00758902	0.758902
BK.IR.001	EB.IR.003	0.00755291	0.755291
BL.IR.001	EB.IR.007	0.00750036	0.750036
EB.LC.010	WL.IR.003	0.00746042	0.746042
BK.IR.003	SY.LC.2.004	0.00743424	0.743424
WL.IR.003	WL.IR.015	0.00742367	0.742367
BL.IR.013	EB.IR.002	0.00737737	0.737737
BK.IR.013	WL.IR.001	0.00737252	0.737252
NZ.LC.002	NZ.LC.M+1.010	0.00736412	0.736412
BK.IR.007	NZ.LC.005	0.00735576	0.735576
EB.IR.005	EB.LC.008	0.00734085	0.734085
BK.IR.009	WL.IR.002	0.00729684	0.729684
WL.IR.017	WL.IR.018	0.00727995	0.727995
WL.IR.001	WL.IR.014	0.00725205	0.725205
BK.IR.014	BL.IR.015	0.00724618	0.724618
EB.IR.002	WL.IR.005	0.00724458	0.724458
EB.LC.008	NZ.LC.002	0.00712941	0.712941
EB.IR.003	WL.IR.005	0.00704293	0.704293
BK.IR.019	BL.IR.003	0.00698291	0.698291
BL.IR.009	WL.IR.012	0.00695716	0.695716
EB.LC.001	WL.IR.017	0.00695139	0.695139
NZ.IR.002	SY.IR.2.002	0.00694388	0.694388
BK.IR.007	EB.LC.010	0.00689933	0.689933
BK.IR.009	NZ.LC.M+1.011	0.00689281	0.689281
BK.IR.009	BK.IR.010	0.00684953	0.684953
NZ.LC.002	WL.IR.025	0.00681683	0.681683
BK.IR.002	BL.IR.032	0.00680954	0.680954
BK.IR.015	NZ.LC.M+1.011	0.0067981	0.67981
NZ.LC.M+1.011	SY.LC.1.001	0.0067362	0.67362
NZ.IR.002	SY.LC.2.005	0.00670672	0.670672
NZ.LC.M+1.007	SY.LC.1.001	0.00665025	0.665025
BL.IR.034	EB.LC.010	0.00662094	0.662094
EB.IR.004	WL.IR.012	0.00656521	0.656521
BK.IR.020	NZ.LC.M+1.010	0.00655703	0.655703
BK.IR.005	BL.IR.003	0.00654381	0.654381
SY.IR.2.005	WL.IR.024	0.00652157	0.652157
EB.IR.007	NZ.IR.004	0.00652135	0.652135
BL.IR.003	WL.IR.025	0.00649869	0.649869
BL.IR.023	NZ.IR.005	0.00649205	0.649205
NZ.IR.007	WL.IR.002	0.00648613	0.648613
EB.IR.005	EB.IR.006	0.00647674	0.647674
BK.IR.013	BL.IR.012	0.0064705	0.64705
BK.IR.009	BL.IR.011	0.006463	0.6463
WL.IR.001	WL.IR.011	0.00643814	0.643814
NZ.LC.006	WL.IR.014	0.00643763	0.643763
BL.IR.009	WL.IR.017	0.00641905	0.641905
WL.IR.001	WL.IR.018	0.00641404	0.641404
NZ.IR.002	WL.IR.002	0.00639132	0.639132
BK.IR.012	EB.LC.004	0.00637659	0.637659
BK.IR.003	EB.IR.008	0.00635375	0.635375
EB.IR.005	SY.LC.1.015	0.00635053	0.635053
BL.IR.009	WL.IR.024	0.00628967	0.628967
BK.IR.005	EB.LC.010	0.00627304	0.627304
SY.LC.1.003	SY.LC.2.004	0.00623805	0.623805
NZ.IR.006	WL.IR.003	0.00623135	0.623135
BK.IR.007	WL.IR.003	0.00611765	0.611765
EB.LC.001	WL.IR.025	0.00608423	0.608423
SY.LC.1.015	SY.LC.2.007	0.00606855	0.606855
NZ.IR.008	WL.IR.005	0.00605796	0.605796
BK.IR.020	BL.IR.030	0.00605039	0.605039
EB.IR.009	WL.IR.002	0.00603873	0.603873
BL.IR.034	WL.IR.003	0.00600735	0.600735
EB.LC.008	NZ.IR.006	0.00597232	0.597232
BK.IR.009	BL.IR.034	0.00594126	0.594126
BK.IR.019	WL.IR.003	0.00586836	0.586836
BK.IR.019	BL.IR.030	0.00586421	0.586421
BK.IR.009	BK.IR.012	0.00584809	0.584809
BL.IR.030	WL.IR.025	0.00578295	0.578295
BK.IR.006	BL.IR.001	0.00575237	0.575237
BL.IR.003	EB.LC.003	0.00575193	0.575193
BK.IR.009	EB.LC.004	0.00570424	0.570424
BL.IR.003	EB.IR.008	0.00569593	0.569593
WL.IR.020	WL.IR.022	0.00568982	0.568982
BL.IR.011	WL.IR.025	0.00568303	0.568303
NZ.LC.M+1.010	NZ.LC.M+1.011	0.00560812	0.560812
WL.IR.005	WL.IR.018	0.00559678	0.559678
NZ.IR.008	WL.IR.015	0.00559498	0.559498
NZ.IR.002	SY.LC.2.006	0.00558355	0.558355
EB.LC.003	NZ.LC.006	0.00556186	0.556186
BK.IR.006	NZ.IR.005	0.00554682	0.554682
BK.IR.006	BL.IR.030	0.00550922	0.550922
BK.IR.012	WL.IR.001	0.00546225	0.546225
EB.IR.005	NZ.IR.005	0.00545981	0.545981
BK.IR.003	BL.IR.003	0.00541653	0.541653
BK.IR.020	BL.IR.016	0.00541317	0.541317
NZ.IR.005	WL.IR.001	0.00541072	0.541072
EB.LC.001	WL.IR.022	0.00537706	0.537706
BL.IR.030	EB.LC.002	0.00536504	0.536504
BK.IR.020	BL.IR.033	0.00535737	0.535737
BL.IR.034	EB.LC.003	0.00534616	0.534616
EB.LC.008	NZ.IR.008	0.00532833	0.532833
NZ.LC.M+1.009	WL.IR.005	0.00531852	0.531852
BK.IR.005	BL.IR.015	0.00527535	0.527535
BL.IR.031	WL.IR.001	0.00527146	0.527146
SY.LC.1.003	WL.IR.002	0.00521761	0.521761
BL.IR.016	SY.LC.1.011	0.00521119	0.521119
NZ.LC.M+1.007	WL.IR.017	0.00519696	0.519696
BK.IR.009	SY.LC.1.001	0.00512143	0.512143
BL.IR.023	WL.IR.015	0.00507891	0.507891
BL.IR.014	NZ.IR.009	0.0050766	0.50766
NZ.IR.002	WL.IR.012	0.00506379	0.506379
BK.IR.013	NZ.LC.M+1.010	0.00504685	0.504685
BL.IR.030	EB.LC.006	0.00504463	0.504463
BK.IR.002	EB.IR.005	0.00490891	0.490891
NZ.IR.009	WL.IR.022	0.00490397	0.490397
EB.IR.008	NZ.IR.004	0.00487819	0.487819
BK.IR.013	BL.IR.018	0.00478622	0.478622
BK.IR.014	BL.IR.018	0.00478237	0.478237
BL.IR.031	EB.IR.002	0.00476475	0.476475
BL.IR.001	BL.IR.012	0.00474719	0.474719
EB.LC.002	EB.LC.003	0.0047339	0.47339
WL.IR.003	WL.IR.014	0.00469927	0.469927
BK.IR.015	WL.IR.003	0.00469625	0.469625
BK.IR.009	WL.IR.011	0.00461917	0.461917
EB.IR.002	EB.LC.001	0.00461502	0.461502
NZ.LC.005	SY.LC.1.011	0.00455352	0.455352
EB.IR.001	WL.IR.003	0.00455126	0.455126
NZ.LC.M+1.009	SY.LC.2.002	0.00454841	0.454841
NZ.IR.005	SY.IR.2.004	0.00454672	0.454672
EB.LC.008	SY.LC.1.003	0.00454223	0.454223
BL.IR.009	EB.IR.007	0.00453678	0.453678
EB.IR.001	NZ.IR.008	0.00451782	0.451782
BK.IR.015	BL.IR.034	0.00450531	0.450531
BL.IR.013	WL.IR.024	0.00450454	0.450454
BK.IR.006	BK.IR.014	0.00449749	0.449749
BK.IR.010	NZ.LC.M+1.011	0.00444473	0.444473
EB.LC.004	NZ.LC.001	0.00441553	0.441553
NZ.IR.004	SY.LC.1.011	0.00440055	0.440055
BL.IR.030	EB.IR.006	0.00428211	0.428211
NZ.LC.001	SY.LC.1.003	0.00424886	0.424886
EB.IR.003	SY.LC.1.003	0.00423153	0.423153
BL.IR.014	WL.IR.016	0.00422862	0.422862
BK.IR.010	WL.IR.020	0.00422703	0.422703
EB.LC.002	WL.IR.021	0.00412848	0.412848
BL.IR.009	NZ.IR.008	0.0040875	0.40875
BK.IR.008	BL.IR.015	0.00404346	0.404346
NZ.IR.004	NZ.LC.005	0.00398166	0.398166
WL.IR.014	WL.IR.025	0.00396754	0.396754
WL.IR.022	WL.IR.024	0.00392474	0.392474
EB.IR.002	EB.LC.006	0.00388719	0.388719
NZ.LC.002	SY.LC.1.011	0.00388206	0.388206
EB.IR.002	WL.IR.025	0.00383153	0.383153
EB.IR.002	WL.IR.011	0.00382852	0.382852
NZ.IR.006	NZ.LC.005	0.00378809	0.378809
BK.IR.012	BL.IR.001	0.00378535	0.378535
BK.IR.013	EB.IR.002	0.00377921	0.377921
BL.IR.032	WL.IR.018	0.00375695	0.375695
BK.IR.020	BL.IR.018	0.00375085	0.375085
BL.IR.012	NZ.IR.011	0.00370807	0.370807
BK.IR.010	NZ.LC.M+1.010	0.00368742	0.368742
BL.IR.030	EB.LC.004	0.00366243	0.366243
BK.IR.001	EB.IR.006	0.0035918	0.35918
BL.IR.023	WL.IR.014	0.00358252	0.358252
WL.IR.016	WL.IR.022	0.00357284	0.357284
EB.IR.004	NZ.IR.008	0.00357046	0.357046
BK.IR.012	WL.IR.015	0.00357033	0.357033
EB.LC.006	NZ.IR.011	0.00348736	0.348736
BK.IR.009	WL.IR.020	0.00347423	0.347423
EB.IR.004	SY.IR.2.003	0.00347143	0.347143
BL.IR.033	EB.IR.005	0.00347011	0.347011
WL.IR.003	WL.IR.021	0.00345751	0.345751
BK.IR.006	WL.IR.001	0.00345688	0.345688
EB.LC.010	NZ.LC.005	0.00345496	0.345496
SY.IR.2.002	WL.IR.002	0.00344253	0.344253
BL.IR.012	EB.IR.006	0.00339136	0.339136
NZ.IR.005	SY.LC.1.001	0.00327403	0.327403
BL.IR.001	NZ.IR.011	0.00325941	0.325941
BK.IR.014	WL.IR.014	0.00321458	0.321458
BK.IR.009	BK.IR.020	0.00321276	0.321276
BL.IR.009	NZ.IR.004	0.00319758	0.319758
EB.IR.001	EB.IR.003	0.00317486	0.317486
NZ.IR.008	SY.LC.2.005	0.00313039	0.313039
BL.IR.033	WL.IR.003	0.00310759	0.310759
EB.LC.010	WL.IR.021	0.00310113	0.310113
NZ.LC.M+1.010	SY.IR.2.005	0.00308605	0.308605
BK.IR.002	NZ.IR.005	0.00300663	0.300663
NZ.IR.005	WL.IR.025	0.0029916	0.29916
EB.LC.004	WL.IR.012	0.0029813	0.29813
BL.IR.001	WL.IR.016	0.00296573	0.296573
EB.IR.009	WL.IR.001	0.00293711	0.293711
EB.IR.002	WL.IR.021	0.00292506	0.292506
BK.IR.008	BL.IR.018	0.00291123	0.291123
BL.IR.015	NZ.IR.011	0.00290469	0.290469
NZ.LC.001	WL.IR.001	0.00287678	0.287678
BL.IR.001	NZ.IR.009	0.00286573	0.286573
WL.IR.005	WL.IR.025	0.00282687	0.282687
BK.IR.007	SY.LC.1.003	0.00280801	0.280801
EB.IR.007	SY.IR.2.003	0.00280298	0.280298
BK.IR.001	BL.IR.033	0.00276291	0.276291
BK.IR.002	SY.IR.2.005	0.00274738	0.274738
BL.IR.030	NZ.LC.M+1.009	0.00270028	0.270028
EB.IR.007	WL.IR.020	0.00267134	0.267134
BK.IR.003	NZ.LC.M+1.010	0.00266813	0.266813
BK.IR.020	WL.IR.024	0.00265753	0.265753
EB.IR.004	EB.LC.001	0.00264721	0.264721
EB.IR.001	WL.IR.015	0.00263736	0.263736
BL.IR.030	NZ.IR.006	0.00263045	0.263045
SY.LC.1.011	WL.IR.015	0.00262694	0.262694
BL.IR.012	NZ.LC.M+1.007	0.00259146	0.259146
SY.LC.1.015	SY.LC.2.006	0.00257927	0.257927
BL.IR.033	WL.IR.011	0.00254059	0.254059
NZ.LC.005	WL.IR.018	0.00253305	0.253305
SY.LC.1.015	WL.IR.002	0.00251265	0.251265
NZ.LC.005	NZ.LC.M+1.010	0.00250367	0.250367
EB.IR.007	EB.LC.003	0.00248904	0.248904
BL.IR.013	SY.LC.1.011	0.00244954	0.244954
BK.IR.015	WL.IR.001	0.00243406	0.243406
NZ.IR.009	SY.LC.1.001	0.00242022	0.242022
NZ.IR.007	NZ.LC.006	0.00240816	0.240816
EB.IR.007	NZ.LC.M+1.009	0.00239899	0.239899
BK.IR.002	WL.IR.025	0.00234484	0.234484
BK.IR.007	WL.IR.014	0.0023291	0.23291
BL.IR.003	NZ.IR.005	0.00229786	0.229786
NZ.LC.M+1.009	WL.IR.015	0.0022805	0.22805
BK.IR.003	BK.IR.015	0.00227393	0.227393
BK.IR.012	EB.LC.001	0.00227352	0.227352
NZ.IR.008	WL.IR.002	0.00227045	0.227045
EB.IR.002	NZ.LC.M+1.010	0.00224599	0.224599
EB.IR.003	SY.LC.1.015	0.00222771	0.222771
BL.IR.032	WL.IR.005	0.00222732	0.222732
BL.IR.033	EB.LC.001	0.00217016	0.217016
BL.IR.032	BL.IR.033	0.00212616	0.212616
BK.IR.015	BL.IR.001	0.00211398	0.211398
NZ.IR.009	WL.IR.018	0.00206682	0.206682
BK.IR.020	BL.IR.015	0.00204535	0.204535
BK.IR.003	NZ.LC.M+1.007	0.00202959	0.202959
BK.IR.006	BL.IR.032	0.00201307	0.201307
EB.IR.005	WL.IR.003	0.00194025	0.194025
EB.LC.002	EB.LC.004	0.0018712	0.18712
BK.IR.009	SY.IR.2.002	0.00185911	0.185911
BL.IR.015	WL.IR.002	0.00182483	0.182483
NZ.LC.005	WL.IR.024	0.00179049	0.179049
BL.IR.011	EB.IR.007	0.0017655	0.17655
BL.IR.009	BL.IR.015	0.00172316	0.172316
BL.IR.018	WL.IR.014	0.00169745	0.169745
BK.IR.009	WL.IR.018	0.00168423	0.168423
BK.IR.007	EB.LC.004	0.00165056	0.165056
NZ.LC.M+1.009	SY.LC.2.003	0.00162694	0.162694
EB.IR.005	NZ.LC.002	0.00161273	0.161273
BK.IR.001	EB.LC.001	0.00158085	0.158085
NZ.IR.007	WL.IR.017	0.00154603	0.154603
BL.IR.012	EB.LC.004	0.00154375	0.154375
BL.IR.023	EB.IR.006	0.00154202	0.154202
NZ.IR.005	WL.IR.016	0.00149324	0.149324
BK.IR.002	SY.IR.2.001	0.00148594	0.148594
NZ.LC.002	NZ.LC.006	0.00147809	0.147809
EB.IR.001	WL.IR.011	0.00137924	0.137924
BL.IR.031	SY.IR.2.005	0.00137703	0.137703
WL.IR.012	WL.IR.018	0.00136882	0.136882
NZ.LC.006	SY.LC.2.003	0.00136168	0.136168
BL.IR.033	WL.IR.012	0.00134738	0.134738
BL.IR.032	WL.IR.003	0.00131077	0.131077
BL.IR.030	BL.IR.033	0.00130212	0.130212
BK.IR.007	BL.IR.033	0.00128241	0.128241
EB.LC.008	SY.LC.2.006	0.00121541	0.121541
BK.IR.001	EB.LC.004	0.00120817	0.120817
EB.LC.010	SY.IR.2.005	0.00119389	0.119389
EB.IR.005	EB.LC.010	0.00118435	0.118435
BL.IR.011	BL.IR.033	0.0011825	0.11825
SY.IR.2.002	SY.LC.2.001	0.0011575	0.11575
BL.IR.001	NZ.LC.002	0.00115499	0.115499
BK.IR.002	NZ.LC.001	0.00113634	0.113634
EB.IR.007	NZ.IR.011	0.00105692	0.105692
BK.IR.009	WL.IR.012	0.00105087	0.105087
BK.IR.020	BL.IR.001	0.00101359	0.101359
BL.IR.016	NZ.LC.006	0.000995827	0.0995827
BK.IR.005	SY.IR.2.005	0.000985377	0.0985377
NZ.LC.001	NZ.LC.006	0.000970352	0.0970352
NZ.IR.005	WL.IR.003	0.00088359	0.088359
BL.IR.003	BL.IR.014	0.000849267	0.0849267
SY.IR.2.005	SY.LC.1.001	0.000836345	0.0836345
EB.IR.001	WL.IR.001	0.00076743	0.076743
BK.IR.019	BL.IR.033	0.00071618	0.071618
BK.IR.015	BK.IR.019	0.000694271	0.0694271
WL.IR.014	WL.IR.022	0.000690486	0.0690486
BK.IR.001	BL.IR.013	0.000664866	0.0664866
BK.IR.007	SY.LC.2.006	0.000657831	0.0657831
BK.IR.005	BL.IR.014	0.000637479	0.0637479
EB.LC.004	NZ.IR.005	0.000611252	0.0611252
BL.IR.003	WL.IR.002	0.000594131	0.0594131
EB.IR.007	SY.LC.1.011	0.000592232	0.0592232
SY.LC.2.002	WL.IR.002	0.000554664	0.0554664
BL.IR.012	BL.IR.031	0.000538907	0.0538907
EB.IR.005	WL.IR.021	0.000532602	0.0532602
BK.IR.008	NZ.IR.006	0.000509032	0.0509032
BK.IR.003	WL.IR.002	0.000480285	0.0480285
SY.LC.1.015	WL.IR.020	0.000419705	0.0419705
BK.IR.019	BL.IR.012	0.000410662	0.0410662
BK.IR.007	BL.IR.030	0.000351771	0.0351771
BK.IR.003	SY.LC.2.002	0.000342895	0.0342895
NZ.LC.M+1.010	SY.LC.1.003	0.000335444	0.0335444
BL.IR.018	WL.IR.020	0.000302757	0.0302757
BK.IR.019	EB.LC.003	0.000279857	0.0279857
EB.IR.001	NZ.LC.M+1.010	0.000240751	0.0240751
BK.IR.005	WL.IR.025	0.000195834	0.0195834
BK.IR.008	EB.LC.010	0.000166407	0.0166407
NZ.LC.M+1.009	SY.LC.2.006	0.000146195	0.0146195
NZ.LC.006	WL.IR.016	9.77585e-05	0.00977585
BK.IR.013	WL.IR.018	6.78459e-05	0.00678459
EB.IR.006	EB.LC.010	4.13941e-05	0.00413941
WL.IR.001	WL.IR.021	4.01972e-05	0.00401972
EB.LC.010	NZ.IR.005	3.37604e-05	0.00337604
BL.IR.014	BL.IR.031	3.33916e-05	0.00333916
BK.IR.019	EB.IR.005	-7.1079e-06	-0.00071079
WL.IR.011	WL.IR.014	-2.16608e-05	-0.00216608
NZ.IR.002	NZ.IR.006	-2.32189e-05	-0.00232189
EB.LC.002	NZ.IR.006	-2.75269e-05	-0.00275269
WL.IR.014	WL.IR.024	-3.75011e-05	-0.00375011
EB.LC.006	WL.IR.003	-0.000129446	-0.0129446
WL.IR.017	WL.IR.022	-0.000132829	-0.0132829
BK.IR.015	EB.LC.002	-0.000166748	-0.0166748
WL.IR.021	WL.IR.022	-0.000167552	-0.0167552
BK.IR.012	SY.LC.1.003	-0.000188521	-0.0188521
BL.IR.030	NZ.LC.M+1.011	-0.000197746	-0.0197746
BK.IR.015	WL.IR.002	-0.000224849	-0.0224849
WL.IR.002	WL.IR.003	-0.000230642	-0.0230642
NZ.IR.004	WL.IR.015	-0.000236875	-0.0236875
EB.LC.002	WL.IR.002	-0.000242864	-0.0242864
BL.IR.003	NZ.IR.004	-0.000244044	-0.0244044
BL.IR.023	WL.IR.021	-0.000245543	-0.0245543
BL.IR.015	BL.IR.034	-0.000270786	-0.0270786
NZ.IR.008	SY.LC.1.015	-0.000274325	-0.0274325
BL.IR.032	NZ.IR.002	-0.000286882	-0.0286882
BK.IR.007	EB.LC.003	-0.000327919	-0.0327919
BK.IR.003	EB.LC.001	-0.000332843	-0.0332843
BL.IR.012	BL.IR.013	-0.000368611	-0.0368611
BK.IR.014	BK.IR.019	-0.000400235	-0.0400235
EB.IR.003	EB.LC.003	-0.000416912	-0.0416912
BK.IR.012	NZ.IR.006	-0.000420915	-0.0420915
EB.IR.006	WL.IR.011	-0.000453871	-0.0453871
NZ.IR.005	SY.LC.1.003	-0.000457634	-0.0457634
BL.IR.001	EB.LC.008	-0.000460141	-0.0460141
NZ.IR.005	NZ.LC.M+1.011	-0.000490235	-0.0490235
NZ.IR.011	WL.IR.022	-0.000490976	-0.0490976
EB.LC.010	WL.IR.020	-0.000499392	-0.0499392
BK.IR.012	WL.IR.017	-0.000508309	-0.0508309
BK.IR.018	EB.LC.008	-0.000539569	-0.0539569
WL.IR.005	WL.IR.024	-0.000542169	-0.0542169
EB.LC.003	WL.IR.002	-0.000553603	-0.0553603
EB.LC.010	WL.IR.018	-0.000616297	-0.0616297
NZ.IR.008	SY.LC.1.001	-0.000658534	-0.0658534
BK.IR.009	NZ.LC.005	-0.000669727	-0.0669727
EB.LC.001	SY.LC.1.015	-0.000680699	-0.0680699
EB.IR.007	WL.IR.025	-0.000690083	-0.0690083
EB.LC.002	NZ.LC.006	-0.000711607	-0.0711607
WL.IR.002	WL.IR.025	-0.000718313	-0.0718313
SY.LC.1.001	WL.IR.002	-0.000727545	-0.0727545
SY.LC.1.003	SY.LC.2.007	-0.000736198	-0.0736198
EB.IR.005	EB.LC.003	-0.000768357	-0.0768357
EB.IR.001	WL.IR.025	-0.000784639	-0.0784639
BK.IR.009	NZ.LC.006	-0.000804528	-0.0804528
EB.IR.007	WL.IR.001	-0.000834164	-0.0834164
EB.IR.006	WL.IR.020	-0.000928093	-0.0928093
BK.IR.012	BL.IR.013	-0.00093798	-0.093798
EB.LC.003	WL.IR.005	-0.000964347	-0.0964347
SY.LC.1.015	SY.LC.2.003	-0.000983448	-0.0983448
EB.IR.006	NZ.LC.005	-0.00102999	-0.102999
BL.IR.014	WL.IR.011	-0.00106092	-0.106092
EB.IR.007	NZ.IR.002	-0.0010734	-0.10734
EB.LC.006	WL.IR.025	-0.00107351	-0.107351
BK.IR.008	NZ.LC.006	-0.00109075	-0.109075
BL.IR.031	NZ.LC.002	-0.00109741	-0.109741
BL.IR.011	WL.IR.012	-0.00109995	-0.109995
BL.IR.034	WL.IR.018	-0.00111726	-0.111726
BL.IR.009	NZ.LC.001	-0.00113113	-0.113113
EB.IR.003	NZ.LC.M+1.011	-0.0011534	-0.11534
EB.LC.010	SY.LC.1.003	-0.00119958	-0.119958
BL.IR.032	SY.IR.2.005	-0.00120258	-0.120258
BL.IR.015	BL.IR.032	-0.00122327	-0.122327
BK.IR.009	WL.IR.017	-0.00123138	-0.123138
BL.IR.012	BL.IR.032	-0.00129893	-0.129893
SY.IR.2.002	SY.LC.2.005	-0.00130471	-0.130471
BL.IR.012	NZ.LC.M+1.011	-0.00131848	-0.131848
BL.IR.033	NZ.LC.M+1.010	-0.00132257	-0.132257
BL.IR.015	WL.IR.016	-0.0013632	-0.13632
NZ.IR.005	SY.LC.1.011	-0.0013875	-0.13875
EB.IR.001	WL.IR.002	-0.00140517	-0.140517
BK.IR.008	NZ.LC.M+1.010	-0.00145259	-0.145259
NZ.LC.005	WL.IR.022	-0.00146859	-0.146859
BL.IR.018	NZ.IR.006	-0.00148215	-0.148215
NZ.LC.M+1.010	WL.IR.003	-0.00153588	-0.153588
BL.IR.015	WL.IR.018	-0.00154632	-0.154632
BL.IR.014	WL.IR.024	-0.00155871	-0.155871
BL.IR.032	NZ.IR.005	-0.0015754	-0.15754
SY.LC.1.003	SY.LC.2.003	-0.00163321	-0.163321
BK.IR.015	EB.IR.005	-0.00170439	-0.170439
SY.IR.2.004	SY.LC.2.001	-0.0017087	-0.17087
NZ.LC.M+1.011	SY.LC.2.003	-0.00170983	-0.170983
BL.IR.015	BL.IR.030	-0.00172647	-0.172647
EB.IR.006	WL.IR.025	-0.0017413	-0.17413
WL.IR.005	WL.IR.021	-0.00179237	-0.179237
BK.IR.001	NZ.LC.M+1.009	-0.00182603	-0.182603
SY.LC.1.001	WL.IR.017	-0.00184622	-0.184622
BL.IR.012	WL.IR.021	-0.00188678	-0.188678
BK.IR.003	SY.LC.2.007	-0.00189026	-0.189026
BK.IR.019	BL.IR.032	-0.00190265	-0.190265
EB.LC.008	SY.IR.2.002	-0.00191154	-0.191154
BK.IR.003	BL.IR.001	-0.00191328	-0.191328
EB.LC.010	WL.IR.016	-0.00192797	-0.192797
BL.IR.012	BL.IR.018	-0.00195617	-0.195617
BK.IR.002	EB.LC.003	-0.00196414	-0.196414
EB.IR.004	NZ.LC.001	-0.00196868	-0.196868
BL.IR.009	WL.IR.022	-0.00200551	-0.200551
EB.IR.005	NZ.LC.M+1.007	-0.00204755	-0.204755
EB.IR.002	WL.IR.020	-0.00205379	-0.205379
BK.IR.008	EB.IR.002	-0.00205605	-0.205605
EB.LC.001	NZ.IR.006	-0.00206967	-0.206967
EB.LC.010	WL.IR.024	-0.00208031	-0.208031
BK.IR.012	EB.IR.003	-0.00208978	-0.208978
EB.LC.004	WL.IR.024	-0.00209054	-0.209054
NZ.IR.006	NZ.IR.008	-0.00210413	-0.210413
WL.IR.002	WL.IR.018	-0.00216521	-0.216521
EB.LC.010	WL.IR.017	-0.00220681	-0.220681
NZ.IR.005	WL.IR.014	-0.00223532	-0.223532
BL.IR.031	BL.IR.033	-0.00223724	-0.223724
EB.IR.008	WL.IR.011	-0.00225147	-0.225147
NZ.LC.M+1.010	WL.IR.012	-0.00225416	-0.225416
BK.IR.005	NZ.IR.006	-0.00229332	-0.229332
NZ.LC.M+1.011	SY.LC.2.004	-0.00230982	-0.230982
BK.IR.005	NZ.LC.M+1.010	-0.00232135	-0.232135
BL.IR.033	EB.LC.002	-0.00238409	-0.238409
BK.IR.009	BL.IR.012	-0.0023958	-0.23958
BK.IR.001	WL.IR.001	-0.00246336	-0.246336
EB.IR.006	WL.IR.022	-0.00247193	-0.247193
EB.IR.002	EB.LC.004	-0.00249188	-0.249188
BK.IR.013	SY.IR.2.005	-0.00252054	-0.252054
BL.IR.003	WL.IR.024	-0.00253816	-0.253816
BK.IR.007	EB.IR.006	-0.00254108	-0.254108
EB.LC.001	WL.IR.021	-0.00258027	-0.258027
EB.LC.004	NZ.IR.006	-0.0025811	-0.25811
BL.IR.003	BL.IR.013	-0.00260674	-0.260674
BL.IR.003	BL.IR.031	-0.00261613	-0.261613
BK.IR.002	SY.LC.1.011	-0.0026514	-0.26514
BK.IR.006	WL.IR.022	-0.00266319	-0.266319
WL.IR.017	WL.IR.024	-0.0026865	-0.26865
BL.IR.032	SY.LC.2.001	-0.00270168	-0.270168
BL.IR.014	NZ.IR.005	-0.00270195	-0.270195
SY.IR.2.002	WL.IR.001	-0.00270661	-0.270661
NZ.LC.M+1.009	SY.LC.2.004	-0.00270925	-0.270925
SY.LC.1.003	WL.IR.005	-0.0027224	-0.27224
EB.IR.003	EB.LC.010	-0.0027241	-0.27241
BL.IR.033	WL.IR.018	-0.0027318	-0.27318
NZ.LC.006	SY.LC.1.011	-0.00275392	-0.275392
NZ.IR.008	WL.IR.018	-0.00277357	-0.277357
EB.IR.006	SY.IR.2.005	-0.00277983	-0.277983
SY.IR.2.004	WL.IR.011	-0.00281148	-0.281148
BK.IR.001	WL.IR.012	-0.00282164	-0.282164
NZ.IR.008	WL.IR.017	-0.0029384	-0.29384
EB.LC.008	NZ.LC.M+1.007	-0.00296816	-0.296816
BL.IR.012	EB.LC.001	-0.00297039	-0.297039
EB.LC.003	SY.IR.2.005	-0.00300513	-0.300513
BL.IR.018	WL.IR.003	-0.00302045	-0.302045
BK.IR.005	NZ.LC.006	-0.00310993	-0.310993
WL.IR.001	WL.IR.022	-0.00313853	-0.313853
NZ.LC.006	WL.IR.021	-0.00314103	-0.314103
BK.IR.015	EB.LC.008	-0.0031453	-0.31453
EB.IR.007	SY.LC.1.015	-0.00319397	-0.319397
BL.IR.003	BL.IR.015	-0.00324237	-0.324237
NZ.LC.005	WL.IR.012	-0.00328055	-0.328055
BK.IR.006	NZ.LC.001	-0.00332437	-0.332437
EB.LC.004	WL.IR.020	-0.00338059	-0.338059
BL.IR.034	EB.IR.006	-0.00342227	-0.342227
BK.IR.002	SY.IR.2.002	-0.00343723	-0.343723
SY.LC.1.015	WL.IR.005	-0.00344135	-0.344135
EB.IR.007	NZ.IR.007	-0.0034816	-0.34816
EB.IR.005	NZ.LC.005	-0.00348839	-0.348839
BK.IR.015	WL.IR.005	-0.00349551	-0.349551
BL.IR.018	EB.LC.010	-0.00349557	-0.349557
EB.LC.006	NZ.LC.M+1.007	-0.0035033	-0.35033
EB.LC.003	WL.IR.025	-0.00355946	-0.355946
BK.IR.006	NZ.LC.M+1.010	-0.0035734	-0.35734
NZ.IR.005	WL.IR.022	-0.00359579	-0.359579
BL.IR.012	WL.IR.020	-0.00361794	-0.361794
EB.LC.001	WL.IR.001	-0.00362113	-0.362113
BK.IR.010	BL.IR.018	-0.0036465	-0.36465
WL.IR.005	WL.IR.011	-0.0036529	-0.36529
BL.IR.013	BL.IR.018	-0.00365733	-0.365733
EB.IR.002	EB.LC.010	-0.00369609	-0.369609
EB.LC.008	NZ.IR.009	-0.00372144	-0.372144
BK.IR.007	WL.IR.012	-0.00374686	-0.374686
BK.IR.015	EB.IR.009	-0.00375717	-0.375717
EB.LC.010	WL.IR.015	-0.0037611	-0.37611
EB.IR.008	NZ.IR.008	-0.00378579	-0.378579
BL.IR.032	WL.IR.014	-0.00386666	-0.386666
BL.IR.013	BL.IR.032	-0.00387856	-0.387856
BL.IR.033	BL.IR.034	-0.00395949	-0.395949
BL.IR.001	WL.IR.025	-0.00396204	-0.396204
BK.IR.014	BL.IR.030	-0.00400655	-0.400655
BL.IR.001	SY.IR.2.003	-0.00401236	-0.401236
BL.IR.023	EB.IR.002	-0.00403656	-0.403656
EB.IR.009	SY.LC.1.001	-0.0040391	-0.40391
BK.IR.015	BL.IR.030	-0.00404736	-0.404736
EB.LC.008	WL.IR.025	-0.00405332	-0.405332
BK.IR.009	BL.IR.018	-0.00406521	-0.406521
BK.IR.001	BL.IR.009	-0.00407517	-0.407517
BL.IR.015	EB.LC.006	-0.0041588	-0.41588
BL.IR.016	NZ.LC.002	-0.00418186	-0.418186
BK.IR.002	BL.IR.001	-0.00421775	-0.421775
BL.IR.013	BL.IR.030	-0.00424215	-0.424215
BL.IR.009	BL.IR.012	-0.00434607	-0.434607
EB.LC.004	WL.IR.025	-0.00435046	-0.435046
BK.IR.013	NZ.LC.006	-0.00436876	-0.436876
WL.IR.018	WL.IR.024	-0.00439375	-0.439375
NZ.LC.M+1.011	WL.IR.012	-0.00442682	-0.442682
BL.IR.014	EB.LC.003	-0.004436	-0.4436
BK.IR.014	SY.IR.2.005	-0.00445606	-0.445606
NZ.LC.M+1.009	SY.LC.2.007	-0.00447053	-0.447053
EB.LC.001	WL.IR.018	-0.00447436	-0.447436
BL.IR.016	WL.IR.003	-0.00447862	-0.447862
BL.IR.018	EB.IR.005	-0.00452955	-0.452955
EB.IR.008	WL.IR.012	-0.00454064	-0.454064
BK.IR.003	SY.LC.2.006	-0.00454366	-0.454366
BL.IR.031	WL.IR.003	-0.00454633	-0.454633
NZ.LC.002	WL.IR.018	-0.00462773	-0.462773
BL.IR.012	WL.IR.015	-0.00463395	-0.463395
BK.IR.007	SY.LC.2.007	-0.00463775	-0.463775
WL.IR.018	WL.IR.020	-0.00465569	-0.465569
BL.IR.014	WL.IR.018	-0.0046574	-0.46574
BK.IR.003	WL.IR.022	-0.00466023	-0.466023
BL.IR.001	NZ.IR.002	-0.00469055	-0.469055
BL.IR.009	NZ.LC.M+1.010	-0.00469525	-0.469525
BL.IR.031	SY.IR.2.002	-0.00471066	-0.471066
EB.LC.002	EB.LC.008	-0.0047183	-0.47183
NZ.LC.M+1.007	WL.IR.024	-0.00472643	-0.472643
BL.IR.009	EB.IR.001	-0.00473673	-0.473673
SY.LC.1.003	WL.IR.011	-0.00476844	-0.476844
EB.LC.006	SY.LC.1.001	-0.00479852	-0.479852
NZ.IR.006	WL.IR.021	-0.0048083	-0.48083
EB.IR.008	EB.LC.003	-0.00484673	-0.484673
EB.LC.010	SY.LC.1.015	-0.0050408	-0.50408
SY.IR.2.004	SY.LC.2.004	-0.00510364	-0.510364
BL.IR.023	EB.IR.004	-0.00510734	-0.510734
BK.IR.020	NZ.LC.002	-0.00511171	-0.511171
BL.IR.001	WL.IR.022	-0.0051213	-0.51213
BK.IR.020	BL.IR.003	-0.00515759	-0.515759
EB.LC.003	SY.LC.1.015	-0.0051642	-0.51642
BK.IR.003	SY.LC.2.001	-0.00518523	-0.518523
BL.IR.030	NZ.IR.005	-0.00527256	-0.527256
BL.IR.009	BL.IR.033	-0.00528529	-0.528529
BK.IR.006	SY.IR.2.002	-0.00530426	-0.530426
BK.IR.007	BL.IR.034	-0.00534249	-0.534249
EB.LC.001	WL.IR.011	-0.00534717	-0.534717
BL.IR.009	NZ.IR.002	-0.00536927	-0.536927
BL.IR.012	EB.IR.009	-0.00543921	-0.543921
NZ.IR.007	WL.IR.015	-0.00544174	-0.544174
EB.LC.001	NZ.LC.001	-0.00549762	-0.549762
BK.IR.010	SY.IR.2.001	-0.00555439	-0.555439
BL.IR.034	WL.IR.024	-0.00556467	-0.556467
BK.IR.010	BL.IR.032	-0.00562128	-0.562128
BK.IR.013	WL.IR.011	-0.00562661	-0.562661
BL.IR.014	WL.IR.025	-0.00563779	-0.563779
BK.IR.009	BL.IR.032	-0.00566287	-0.566287
BL.IR.033	EB.IR.002	-0.00571201	-0.571201
SY.IR.2.004	WL.IR.001	-0.00574528	-0.574528
BK.IR.013	WL.IR.020	-0.00574865	-0.574865
EB.IR.002	NZ.LC.001	-0.00579114	-0.579114
BL.IR.001	BL.IR.015	-0.00582591	-0.582591
EB.IR.007	SY.IR.2.004	-0.00584338	-0.584338
EB.LC.006	NZ.IR.002	-0.0058776	-0.58776
EB.IR.005	NZ.LC.001	-0.00592211	-0.592211
SY.IR.2.005	WL.IR.014	-0.00592774	-0.592774
BK.IR.013	WL.IR.024	-0.00592859	-0.592859
BL.IR.032	NZ.IR.006	-0.00597135	-0.597135
EB.LC.008	SY.IR.2.004	-0.00597867	-0.597867
BK.IR.003	BK.IR.007	-0.00597919	-0.597919
BK.IR.009	NZ.LC.M+1.007	-0.00602614	-0.602614
EB.IR.008	NZ.LC.M+1.011	-0.00603383	-0.603383
BL.IR.011	EB.IR.002	-0.00607237	-0.607237
BL.IR.031	WL.IR.018	-0.00609336	-0.609336
NZ.IR.011	WL.IR.001	-0.00610145	-0.610145
BL.IR.015	BL.IR.023	-0.00610327	-0.610327
EB.IR.004	WL.IR.003	-0.00611151	-0.611151
SY.LC.1.003	SY.LC.2.005	-0.00611991	-0.611991
BL.IR.014	EB.LC.008	-0.00613235	-0.613235
BK.IR.007	NZ.IR.005	-0.00614106	-0.614106
SY.LC.1.003	WL.IR.020	-0.0061775	-0.61775
BL.IR.012	BL.IR.030	-0.00623973	-0.623973
BK.IR.007	BL.IR.018	-0.00624242	-0.624242
BK.IR.001	EB.IR.002	-0.00624291	-0.624291
BL.IR.033	WL.IR.022	-0.00625389	-0.625389
SY.IR.2.004	SY.LC.2.003	-0.00626226	-0.626226
EB.IR.004	NZ.LC.M+1.009	-0.00626323	-0.626323
NZ.LC.M+1.009	WL.IR.012	-0.0063831	-0.63831
BL.IR.013	NZ.IR.006	-0.0063962	-0.63962
NZ.LC.006	SY.LC.2.007	-0.00640264	-0.640264
BL.IR.014	WL.IR.012	-0.00648097	-0.648097
BL.IR.003	NZ.LC.002	-0.00648593	-0.648593
BL.IR.015	NZ.IR.006	-0.00652681	-0.652681
BK.IR.008	EB.LC.002	-0.00655469	-0.655469
NZ.LC.006	SY.LC.2.006	-0.00655886	-0.655886
EB.LC.003	WL.IR.001	-0.00655954	-0.655954
NZ.LC.006	WL.IR.018	-0.00658869	-0.658869
BL.IR.001	NZ.LC.M+1.009	-0.00659114	-0.659114
BL.IR.014	SY.LC.2.002	-0.0065921	-0.65921
BL.IR.001	NZ.IR.005	-0.0066066	-0.66066
BL.IR.031	WL.IR.025	-0.00662329	-0.662329
BK.IR.003	WL.IR.025	-0.00664402	-0.664402
BL.IR.003	WL.IR.001	-0.00664808	-0.664808
SY.LC.1.011	SY.LC.2.001	-0.00667884	-0.667884
BK.IR.018	NZ.IR.004	-0.00667999	-0.667999
BL.IR.015	NZ.LC.M+1.010	-0.0066944	-0.66944
EB.LC.003	SY.IR.2.004	-0.00681675	-0.681675
BL.IR.033	WL.IR.015	-0.00681866	-0.681866
BK.IR.002	BL.IR.014	-0.00689868	-0.689868
BK.IR.007	SY.IR.2.003	-0.00691838	-0.691838
BK.IR.018	BL.IR.034	-0.00694931	-0.694931
BK.IR.008	BL.IR.030	-0.00696967	-0.696967
BL.IR.030	WL.IR.012	-0.00697377	-0.697377
BK.IR.020	BL.IR.032	-0.00701485	-0.701485
BK.IR.010	BL.IR.003	-0.00701754	-0.701754
BL.IR.001	WL.IR.001	-0.00703357	-0.703357
BL.IR.003	NZ.LC.001	-0.00703862	-0.703862
BK.IR.009	WL.IR.024	-0.00705597	-0.705597
EB.IR.006	WL.IR.014	-0.00708396	-0.708396
NZ.LC.001	WL.IR.011	-0.00709236	-0.709236
EB.LC.008	WL.IR.020	-0.00709944	-0.709944
BL.IR.003	EB.LC.010	-0.00710071	-0.710071
BL.IR.001	NZ.LC.001	-0.0071082	-0.71082
BL.IR.013	SY.IR.2.002	-0.00711205	-0.711205
BL.IR.014	EB.IR.004	-0.00711332	-0.711332
SY.LC.1.003	SY.LC.2.002	-0.00711473	-0.711473
BL.IR.014	SY.IR.2.005	-0.0071341	-0.71341
BL.IR.014	EB.IR.006	-0.00713793	-0.713793
EB.IR.004	EB.LC.010	-0.00718383	-0.718383
BL.IR.013	WL.IR.025	-0.00728438	-0.728438
SY.LC.1.011	SY.LC.2.005	-0.00730329	-0.730329
EB.LC.006	SY.IR.2.004	-0.0073105	-0.73105
BL.IR.015	NZ.LC.001	-0.00738112	-0.738112
BL.IR.001	BL.IR.031	-0.00742503	-0.742503
BL.IR.012	WL.IR.005	-0.00742811	-0.742811
BL.IR.014	WL.IR.021	-0.00743976	-0.743976
BL.IR.018	EB.IR.002	-0.00744949	-0.744949
NZ.LC.001	WL.IR.022	-0.00748904	-0.748904
EB.IR.008	NZ.LC.M+1.007	-0.00750341	-0.750341
BK.IR.003	NZ.IR.009	-0.00750711	-0.750711
BL.IR.003	BL.IR.016	-0.00754166	-0.754166
EB.IR.002	WL.IR.024	-0.00755281	-0.755281
BL.IR.032	EB.IR.006	-0.00755302	-0.755302
BK.IR.001	BL.IR.016	-0.00755624	-0.755624
BL.IR.016	EB.IR.001	-0.0075678	-0.75678
BK.IR.009	EB.IR.004	-0.00756823	-0.756823
EB.IR.002	SY.LC.1.015	-0.00757962	-0.757962
BK.IR.009	EB.LC.002	-0.00758898	-0.758898
NZ.LC.M+1.010	WL.IR.020	-0.00760419	-0.760419
EB.IR.008	SY.LC.2.002	-0.00764559	-0.764559
EB.LC.001	NZ.IR.007	-0.00769192	-0.769192
BL.IR.009	BL.IR.032	-0.0076977	-0.76977
BK.IR.020	WL.IR.003	-0.00772538	-0.772538
BK.IR.007	BL.IR.015	-0.00775468	-0.775468
BK.IR.005	NZ.IR.009	-0.00777153	-0.777153
NZ.LC.M+1.011	SY.LC.1.003	-0.00777773	-0.777773
BK.IR.005	BK.IR.012	-0.00777882	-0.777882
BK.IR.003	BL.IR.015	-0.00779353	-0.779353
EB.IR.004	NZ.LC.002	-0.00779422	-0.779422
BK.IR.008	WL.IR.011	-0.00784455	-0.784455
BK.IR.013	EB.LC.002	-0.00791327	-0.791327
EB.LC.008	WL.IR.015	-0.00793995	-0.793995
BL.IR.011	WL.IR.020	-0.00796795	-0.796795
BK.IR.015	BL.IR.018	-0.00799802	-0.799802
BL.IR.014	BL.IR.023	-0.00800393	-0.800393
BK.IR.002	BL.IR.033	-0.00801147	-0.801147
EB.LC.008	SY.IR.2.005	-0.0080241	-0.80241
EB.IR.003	WL.IR.012	-0.00804337	-0.804337
EB.IR.008	WL.IR.018	-0.00809336	-0.809336
BK.IR.012	NZ.IR.009	-0.0081336	-0.81336
BL.IR.033	WL.IR.025	-0.00817359	-0.817359
BL.IR.023	EB.LC.003	-0.00821841	-0.821841
NZ.LC.001	WL.IR.012	-0.00826082	-0.826082
NZ.LC.006	WL.IR.003	-0.00826268	-0.826268
BL.IR.033	WL.IR.024	-0.00826615	-0.826615
EB.IR.005	WL.IR.001	-0.00827443	-0.827443
NZ.IR.002	NZ.LC.001	-0.00828877	-0.828877
BK.IR.007	BK.IR.019	-0.00831558	-0.831558
BL.IR.001	BL.IR.033	-0.0083324	-0.83324
EB.LC.002	WL.IR.012	-0.00833524	-0.833524
WL.IR.011	WL.IR.022	-0.00835558	-0.835558
BL.IR.015	WL.IR.003	-0.00838245	-0.838245
EB.IR.009	EB.LC.001	-0.00843	-0.843
NZ.LC.M+1.007	WL.IR.001	-0.00846068	-0.846068
BL.IR.003	WL.IR.015	-0.00847098	-0.847098
BK.IR.015	BL.IR.013	-0.00847156	-0.847156
BK.IR.019	SY.IR.2.002	-0.00848881	-0.848881
BK.IR.009	BL.IR.003	-0.00851447	-0.851447
BK.IR.005	BK.IR.010	-0.00855592	-0.855592
BK.IR.012	BL.IR.011	-0.00857936	-0.857936
BL.IR.012	NZ.LC.M+1.010	-0.00860889	-0.860889
BL.IR.015	NZ.LC.006	-0.00862409	-0.862409
BL.IR.009	SY.LC.2.007	-0.00862471	-0.862471
BL.IR.033	SY.LC.1.001	-0.008738	-0.8738
EB.IR.003	WL.IR.020	-0.00877272	-0.877272
BK.IR.010	BL.IR.033	-0.00879119	-0.879119
SY.IR.2.005	WL.IR.025	-0.00886919	-0.886919
EB.IR.005	SY.LC.1.011	-0.00889646	-0.889646
EB.LC.004	SY.LC.1.011	-0.00891791	-0.891791
EB.IR.004	SY.IR.2.004	-0.00893089	-0.893089
NZ.LC.M+1.007	WL.IR.011	-0.0089683	-0.89683
NZ.IR.011	WL.IR.005	-0.00897917	-0.897917
BK.IR.010	NZ.LC.M+1.007	-0.00898555	-0.898555
BK.IR.005	NZ.LC.M+1.009	-0.00902702	-0.902702
EB.IR.001	NZ.LC.M+1.009	-0.00917174	-0.917174
BL.IR.031	EB.LC.002	-0.00918267	-0.918267
BK.IR.005	NZ.IR.002	-0.0091847	-0.91847
NZ.LC.M+1.010	WL.IR.024	-0.00919559	-0.919559
BK.IR.010	SY.LC.1.001	-0.00919994	-0.919994
BL.IR.014	EB.LC.004	-0.00921088	-0.921088
BK.IR.008	WL.IR.020	-0.00921283	-0.921283
BK.IR.012	SY.LC.2.007	-0.00921586	-0.921586
BK.IR.015	WL.IR.024	-0.00925345	-0.925345
EB.LC.001	NZ.LC.M+1.007	-0.00926035	-0.926035
EB.LC.006	WL.IR.001	-0.00926795	-0.926795
BL.IR.033	NZ.LC.M+1.011	-0.00928283	-0.928283
BK.IR.007	BL.IR.032	-0.00930787	-0.930787
BK.IR.018	WL.IR.002	-0.00931696	-0.931696
EB.LC.008	SY.LC.2.002	-0.00933171	-0.933171
NZ.IR.007	SY.LC.1.011	-0.00934571	-0.934571
SY.LC.2.001	WL.IR.002	-0.00944296	-0.944296
NZ.LC.001	SY.LC.1.011	-0.00945415	-0.945415
BK.IR.019	WL.IR.018	-0.00945982	-0.945982
BL.IR.009	WL.IR.001	-0.00947235	-0.947235
BL.IR.012	WL.IR.002	-0.00947681	-0.947681
BL.IR.034	EB.LC.001	-0.00950402	-0.950402
NZ.LC.M+1.007	SY.IR.2.005	-0.00955363	-0.955363
BK.IR.001	SY.LC.1.001	-0.00957303	-0.957303
EB.IR.002	EB.LC.003	-0.00957666	-0.957666
BK.IR.002	EB.IR.006	-0.00958202	-0.958202
BL.IR.015	WL.IR.012	-0.00959579	-0.959579
BL.IR.023	WL.IR.012	-0.00960166	-0.960166
BK.IR.005	WL.IR.012	-0.00960921	-0.960921
BL.IR.015	WL.IR.024	-0.0096241	-0.96241
BL.IR.014	WL.IR.005	-0.00962977	-0.962977
NZ.LC.006	WL.IR.002	-0.00964098	-0.964098
BK.IR.018	WL.IR.020	-0.00965388	-0.965388
EB.LC.003	EB.LC.008	-0.00971554	-0.971554
NZ.LC.006	WL.IR.011	-0.00975368	-0.975368
BK.IR.007	WL.IR.011	-0.00980094	-0.980094
EB.IR.006	WL.IR.024	-0.00980239	-0.980239
BL.IR.032	SY.IR.2.004	-0.00982624	-0.982624
BK.IR.012	BL.IR.023	-0.00984751	-0.984751
BK.IR.015	WL.IR.025	-0.0098763	-0.98763
BK.IR.012	SY.IR.2.002	-0.00989114	-0.989114
BL.IR.012	WL.IR.014	-0.0099275	-0.99275
EB.IR.002	NZ.LC.005	-0.00994248	-0.994248
BL.IR.032	WL.IR.015	-0.00994984	-0.994984
BL.IR.014	EB.LC.002	-0.00998543	-0.998543
EB.LC.002	WL.IR.015	-0.00999754	-0.999754
EB.LC.008	SY.LC.2.003	-0.0100626	-1.00626
BL.IR.011	NZ.IR.006	-0.0100683	-1.00683
EB.IR.004	EB.LC.004	-0.0101159	-1.01159
NZ.IR.005	WL.IR.024	-0.0101496	-1.01496
BL.IR.030	EB.IR.002	-0.010175	-1.0175
NZ.IR.011	WL.IR.025	-0.0101984	-1.01984
EB.IR.009	EB.LC.010	-0.0102268	-1.02268
BK.IR.007	WL.IR.016	-0.0102814	-1.02814
BL.IR.033	EB.LC.003	-0.010285	-1.0285
NZ.LC.006	SY.LC.1.001	-0.0102901	-1.02901
BL.IR.014	EB.IR.005	-0.0102918	-1.02918
EB.LC.010	NZ.IR.004	-0.0103039	-1.03039
EB.IR.006	NZ.IR.011	-0.0103253	-1.03253
EB.LC.004	NZ.LC.002	-0.0103406	-1.03406
EB.IR.007	EB.LC.002	-0.0103468	-1.03468
NZ.IR.005	WL.IR.002	-0.0103645	-1.03645
BK.IR.003	BK.IR.012	-0.0103651	-1.03651
NZ.IR.008	SY.IR.2.001	-0.0104029	-1.04029
BL.IR.003	BL.IR.033	-0.0104135	-1.04135
BK.IR.005	EB.LC.003	-0.0104421	-1.04421
BL.IR.011	WL.IR.018	-0.0104442	-1.04442
BK.IR.018	EB.LC.003	-0.010511	-1.0511
BL.IR.012	BL.IR.034	-0.0105187	-1.05187
BL.IR.015	SY.IR.2.004	-0.0106489	-1.06489
NZ.LC.M+1.010	WL.IR.001	-0.0106678	-1.06678
EB.IR.004	WL.IR.025	-0.0106722	-1.06722
NZ.IR.005	SY.LC.1.015	-0.0106846	-1.06846
EB.LC.010	WL.IR.002	-0.0106962	-1.06962
EB.LC.006	NZ.LC.M+1.011	-0.0107049	-1.07049
BL.IR.015	EB.LC.003	-0.0107324	-1.07324
BK.IR.001	EB.LC.003	-0.0108103	-1.08103
BL.IR.023	WL.IR.001	-0.0108145	-1.08145
SY.IR.2.005	SY.LC.2.005	-0.0108208	-1.08208
SY.LC.1.015	SY.LC.2.001	-0.0108303	-1.08303
EB.IR.002	NZ.IR.002	-0.0108566	-1.08566
BK.IR.013	EB.LC.001	-0.0108742	-1.08742
NZ.IR.004	SY.IR.2.003	-0.0108854	-1.08854
BL.IR.033	EB.IR.009	-0.0108896	-1.08896
EB.IR.008	NZ.LC.M+1.009	-0.0109621	-1.09621
BL.IR.033	EB.LC.008	-0.010966	-1.0966
BK.IR.007	WL.IR.017	-0.0110001	-1.10001
BK.IR.007	BL.IR.001	-0.011005	-1.1005
BL.IR.015	BL.IR.016	-0.0110367	-1.10367
SY.LC.1.011	SY.LC.2.002	-0.0110382	-1.10382
SY.IR.2.003	SY.LC.1.001	-0.0110456	-1.10456
BK.IR.007	BK.IR.014	-0.0110483	-1.10483
NZ.IR.011	WL.IR.020	-0.0110755	-1.10755
EB.LC.010	NZ.LC.M+1.011	-0.011112	-1.1112
BL.IR.003	SY.IR.2.004	-0.0111292	-1.11292
BL.IR.003	BL.IR.032	-0.0111308	-1.11308
BK.IR.013	EB.LC.010	-0.0111648	-1.11648
NZ.IR.011	SY.LC.1.001	-0.0112019	-1.12019
EB.IR.009	WL.IR.003	-0.01125	-1.125
EB.IR.005	NZ.LC.006	-0.0112712	-1.12712
BL.IR.032	EB.LC.001	-0.011419	-1.1419
NZ.IR.005	SY.LC.2.007	-0.011481	-1.1481
BK.IR.007	BL.IR.011	-0.0114933	-1.14933
SY.LC.2.004	WL.IR.002	-0.0114951	-1.14951
NZ.IR.004	NZ.IR.009	-0.0115038	-1.15038
WL.IR.002	WL.IR.020	-0.0115855	-1.15855
BL.IR.031	WL.IR.022	-0.0115919	-1.15919
EB.IR.006	NZ.LC.001	-0.0115988	-1.15988
BL.IR.014	NZ.IR.004	-0.0116008	-1.16008
BL.IR.032	EB.IR.001	-0.0116055	-1.16055
EB.LC.008	SY.LC.2.007	-0.0116066	-1.16066
BL.IR.012	EB.LC.006	-0.0116132	-1.16132
BL.IR.032	NZ.IR.007	-0.0116277	-1.16277
BK.IR.015	EB.IR.008	-0.0116442	-1.16442
SY.LC.1.003	SY.LC.2.001	-0.0116691	-1.16691
EB.IR.009	NZ.LC.M+1.007	-0.0116958	-1.16958
BL.IR.012	EB.LC.002	-0.0117001	-1.17001
SY.IR.2.005	WL.IR.016	-0.0117055	-1.17055
EB.IR.003	WL.IR.024	-0.0117163	-1.17163
BL.IR.018	WL.IR.022	-0.0117358	-1.17358
BK.IR.010	NZ.IR.009	-0.0117378	-1.17378
BK.IR.015	NZ.LC.M+1.009	-0.0117934	-1.17934
NZ.LC.002	NZ.LC.M+1.009	-0.0118109	-1.18109
BL.IR.001	WL.IR.018	-0.0118153	-1.18153
BK.IR.003	BK.IR.013	-0.0118354	-1.18354
NZ.LC.001	WL.IR.005	-0.0118746	-1.18746
NZ.LC.M+1.011	SY.LC.1.015	-0.0118778	-1.18778
[truncated: 2,562 more rows]

## Sheet: relatedness_manichaikul
Table S3. Kinship coefficients calculated with the --relatedness2 parameter in VCFtools v.0.1.15 based on an algorithm reported by Manichaikul et al. (2010)
INDV1	INDV2	N_AaAa	N_AAaa	N1_Aa	N2_Aa	RELATEDNESS_PHI
SY.LC.2.001	SY.LC.2.002	907	1	1107	1098	0.410431
SY.LC.2.002	SY.LC.2.001	907	1	1098	1107	0.410431
SY.LC.2.006	SY.LC.2.007	898	12	1158	1149	0.378847
SY.LC.2.007	SY.LC.2.006	898	12	1149	1158	0.378847
SY.LC.2.003	SY.LC.2.004	821	4	1108	1139	0.361816
SY.LC.2.004	SY.LC.2.003	821	4	1139	1108	0.361816
SY.LC.2.001	SY.LC.2.005	751	4	1107	1144	0.330076
SY.LC.2.005	SY.LC.2.001	751	4	1144	1107	0.330076
SY.LC.2.002	SY.LC.2.004	750	20	1098	1139	0.317389
SY.LC.2.004	SY.LC.2.002	750	20	1139	1098	0.317389
SY.IR.2.001	SY.IR.2.002	797	47	1136	1154	0.306987
SY.IR.2.002	SY.IR.2.001	797	47	1154	1136	0.306987
SY.IR.2.001	SY.IR.2.003	743	27	1136	1161	0.299956
SY.IR.2.003	SY.IR.2.001	743	27	1161	1136	0.299956
SY.LC.2.002	SY.LC.2.003	710	44	1098	1108	0.281958
SY.LC.2.003	SY.LC.2.002	710	44	1108	1098	0.281958
SY.LC.2.003	SY.LC.2.005	672	26	1108	1144	0.275311
SY.LC.2.005	SY.LC.2.003	672	26	1144	1108	0.275311
SY.LC.2.002	SY.LC.2.005	625	17	1098	1144	0.263604
SY.LC.2.005	SY.LC.2.002	625	17	1144	1098	0.263604
SY.LC.2.001	SY.LC.2.004	606	12	1107	1139	0.259127
SY.LC.2.004	SY.LC.2.001	606	12	1139	1107	0.259127
SY.LC.2.001	SY.LC.2.003	575	35	1107	1108	0.227991
SY.LC.2.003	SY.LC.2.001	575	35	1108	1107	0.227991
SY.LC.1.001	SY.LC.1.011	641	85	1067	1076	0.219785
SY.LC.1.011	SY.LC.1.001	641	85	1076	1067	0.219785
SY.LC.2.005	SY.LC.2.006	588	45	1144	1158	0.216334
SY.LC.2.006	SY.LC.2.005	588	45	1158	1144	0.216334
SY.LC.1.003	SY.LC.1.015	483	25	986	1047	0.212986
SY.LC.1.015	SY.LC.1.003	483	25	1047	986	0.212986
SY.LC.2.003	SY.LC.2.006	613	71	1108	1158	0.207855
SY.LC.2.006	SY.LC.2.003	613	71	1158	1108	0.207855
SY.LC.2.003	SY.LC.2.007	573	68	1108	1149	0.19362
SY.LC.2.007	SY.LC.2.003	573	68	1149	1108	0.19362
SY.IR.2.002	SY.IR.2.003	535	55	1154	1161	0.183585
SY.IR.2.003	SY.IR.2.002	535	55	1161	1154	0.183585
SY.LC.2.005	SY.LC.2.007	543	62	1144	1149	0.18273
SY.LC.2.007	SY.LC.2.005	543	62	1149	1144	0.18273
SY.LC.2.004	SY.LC.2.005	520	52	1139	1144	0.182216
SY.LC.2.005	SY.LC.2.004	520	52	1144	1139	0.182216
SY.LC.2.004	SY.LC.2.006	516	51	1139	1158	0.180235
SY.LC.2.006	SY.LC.2.004	516	51	1158	1139	0.180235
SY.LC.2.001	SY.LC.2.007	533	67	1107	1149	0.176862
SY.LC.2.007	SY.LC.2.001	533	67	1149	1107	0.176862
SY.LC.2.004	SY.LC.2.007	525	67	1139	1149	0.170892
SY.LC.2.007	SY.LC.2.004	525	67	1149	1139	0.170892
BL.IR.023	BL.IR.030	475	82	1114	1108	0.139964
BL.IR.030	BL.IR.023	475	82	1108	1114	0.139964
BL.IR.001	BL.IR.030	296	32	680	1108	0.129754
BL.IR.030	BL.IR.001	296	32	1108	680	0.129754
SY.LC.2.002	SY.LC.2.007	493	109	1098	1149	0.122385
SY.LC.2.007	SY.LC.2.002	493	109	1149	1098	0.122385
SY.LC.2.001	SY.LC.2.006	453	109	1107	1158	0.103753
SY.LC.2.006	SY.LC.2.001	453	109	1158	1107	0.103753
BL.IR.018	BL.IR.023	444	111	1110	1114	0.0998201
BL.IR.023	BL.IR.018	444	111	1114	1110	0.0998201
NZ.IR.011	NZ.LC.M+1.010	357	85	895	1176	0.0902945
NZ.LC.M+1.010	NZ.IR.011	357	85	1176	895	0.0902945
BL.IR.018	BL.IR.030	424	113	1110	1108	0.0892696
BL.IR.030	BL.IR.018	424	113	1108	1110	0.0892696
NZ.IR.008	NZ.IR.009	424	114	1028	1190	0.0883679
NZ.IR.009	NZ.IR.008	424	114	1190	1028	0.0883679
NZ.IR.009	NZ.LC.002	432	114	1190	1146	0.0873288
NZ.LC.002	NZ.IR.009	432	114	1146	1190	0.0873288
BL.IR.001	BL.IR.032	273	60	680	1085	0.0866856
BL.IR.032	BL.IR.001	273	60	1085	680	0.0866856
BL.IR.014	SY.IR.2.001	413	115	1092	1136	0.0821364
SY.IR.2.001	BL.IR.014	413	115	1136	1092	0.0821364
SY.IR.2.003	SY.LC.2.003	407	112	1161	1108	0.0806523
SY.LC.2.003	SY.IR.2.003	407	112	1108	1161	0.0806523
EB.LC.001	NZ.LC.002	218	43	593	1146	0.0759057
NZ.LC.002	EB.LC.001	218	43	1146	593	0.0759057
BL.IR.023	BL.IR.032	413	124	1114	1085	0.0750341
BL.IR.032	BL.IR.023	413	124	1085	1114	0.0750341
NZ.IR.009	NZ.LC.M+1.010	469	150	1190	1176	0.0714286
NZ.LC.M+1.010	NZ.IR.009	469	150	1176	1190	0.0714286
SY.IR.2.001	SY.LC.2.007	377	108	1136	1149	0.0704595
SY.LC.2.007	SY.IR.2.001	377	108	1149	1136	0.0704595
SY.IR.2.003	SY.LC.2.002	396	121	1161	1098	0.0681718
SY.LC.2.002	SY.IR.2.003	396	121	1098	1161	0.0681718
SY.IR.2.003	SY.LC.2.004	387	119	1161	1139	0.0647826
SY.LC.2.004	SY.IR.2.003	387	119	1139	1161	0.0647826
SY.IR.2.003	SY.LC.2.007	397	125	1161	1149	0.0636364
SY.LC.2.007	SY.IR.2.003	397	125	1149	1161	0.0636364
BL.IR.014	SY.IR.2.004	390	127	1092	1107	0.0618463
SY.IR.2.004	BL.IR.014	390	127	1107	1092	0.0618463
BL.IR.014	SY.IR.2.002	428	147	1092	1154	0.0596616
SY.IR.2.002	BL.IR.014	428	147	1154	1092	0.0596616
BL.IR.011	BL.IR.023	360	118	967	1114	0.0595867
BL.IR.023	BL.IR.011	360	118	1114	967	0.0595867
SY.IR.2.001	SY.LC.2.003	345	106	1136	1108	0.0592692
SY.LC.2.003	SY.IR.2.001	345	106	1108	1136	0.0592692
NZ.LC.001	NZ.LC.002	419	143	1132	1146	0.0583845
NZ.LC.002	NZ.LC.001	419	143	1146	1132	0.0583845
NZ.IR.006	NZ.LC.M+1.010	408	139	1085	1176	0.0574967
NZ.LC.M+1.010	NZ.IR.006	408	139	1176	1085	0.0574967
SY.IR.2.001	SY.LC.2.005	350	111	1136	1144	0.0561404
SY.LC.2.005	SY.IR.2.001	350	111	1144	1136	0.0561404
SY.IR.2.001	SY.LC.2.001	320	98	1136	1107	0.0552831
SY.LC.2.001	SY.IR.2.001	320	98	1107	1136	0.0552831
SY.IR.2.003	SY.IR.2.004	413	144	1161	1107	0.0551146
SY.IR.2.004	SY.IR.2.003	413	144	1107	1161	0.0551146
SY.LC.2.002	SY.LC.2.006	411	145	1098	1158	0.0536348
SY.LC.2.006	SY.LC.2.002	411	145	1158	1098	0.0536348
BL.IR.001	BL.IR.023	244	74	680	1114	0.0535117
BL.IR.023	BL.IR.001	244	74	1114	680	0.0535117
NZ.LC.002	WL.IR.024	339	112	1146	1064	0.0520362
WL.IR.024	NZ.LC.002	339	112	1064	1146	0.0520362
SY.IR.2.003	SY.LC.2.001	366	124	1161	1107	0.0520282
SY.LC.2.001	SY.IR.2.003	366	124	1107	1161	0.0520282
BL.IR.016	BL.IR.023	367	129	992	1114	0.0517569
BL.IR.023	BL.IR.016	367	129	1114	992	0.0517569
NZ.LC.002	WL.IR.012	339	112	1146	1088	0.0514772
WL.IR.012	NZ.LC.002	339	112	1088	1146	0.0514772
SY.IR.2.001	SY.IR.2.005	389	136	1136	1145	0.0512933
SY.IR.2.005	SY.IR.2.001	389	136	1145	1136	0.0512933
BK.IR.010	BK.IR.019	57	13	209	399	0.0509868
BK.IR.019	BK.IR.010	57	13	399	209	0.0509868
NZ.LC.001	NZ.LC.M+1.010	409	146	1132	1176	0.0506932
NZ.LC.M+1.010	NZ.LC.001	409	146	1176	1132	0.0506932
EB.IR.002	EB.LC.002	400	147	1070	1056	0.0498589
EB.LC.002	EB.IR.002	400	147	1056	1070	0.0498589
BL.IR.011	BL.IR.030	332	115	967	1108	0.0491566
BL.IR.030	BL.IR.011	332	115	1108	967	0.0491566
SY.IR.2.001	SY.IR.2.004	378	134	1136	1107	0.0490415
SY.IR.2.004	SY.IR.2.001	378	134	1107	1136	0.0490415
BK.IR.010	BK.IR.012	62	14	209	485	0.0489914
BK.IR.012	BK.IR.010	62	14	485	209	0.0489914
NZ.IR.008	NZ.LC.002	334	114	1028	1146	0.048758
NZ.LC.002	NZ.IR.008	334	114	1146	1028	0.048758
SY.IR.2.001	SY.LC.2.002	344	118	1136	1098	0.0483438
SY.LC.2.002	SY.IR.2.001	344	118	1098	1136	0.0483438
NZ.IR.008	NZ.LC.M+1.009	361	131	1028	1034	0.0480116
NZ.LC.M+1.009	NZ.IR.008	361	131	1034	1028	0.0480116
NZ.IR.007	NZ.IR.008	353	128	1003	1028	0.0477597
NZ.IR.008	NZ.IR.007	353	128	1028	1003	0.0477597
SY.IR.2.001	SY.LC.2.004	342	117	1136	1139	0.0474725
SY.LC.2.004	SY.IR.2.001	342	117	1139	1136	0.0474725
BL.IR.001	NZ.LC.002	226	70	680	1146	0.0470975
NZ.LC.002	BL.IR.001	226	70	1146	680	0.0470975
BL.IR.014	SY.IR.2.003	380	137	1092	1161	0.0470484
SY.IR.2.003	BL.IR.014	380	137	1161	1092	0.0470484
BL.IR.030	BL.IR.031	349	127	1108	926	0.046706
BL.IR.031	BL.IR.030	349	127	926	1108	0.046706
BK.IR.015	BK.IR.020	334	120	996	1023	0.0465577
BK.IR.020	BK.IR.015	334	120	1023	996	0.0465577
EB.IR.003	EB.LC.002	361	132	1046	1056	0.0461465
EB.LC.002	EB.IR.003	361	132	1056	1046	0.0461465
SY.IR.2.004	SY.LC.2.007	376	136	1107	1149	0.0460993
SY.LC.2.007	SY.IR.2.004	376	136	1149	1107	0.0460993
BK.IR.009	NZ.LC.002	236	75	740	1146	0.0455992
NZ.LC.002	BK.IR.009	236	75	1146	740	0.0455992
NZ.IR.009	SY.IR.2.001	352	123	1190	1136	0.0455718
SY.IR.2.001	NZ.IR.009	352	123	1136	1190	0.0455718
BK.IR.006	BK.IR.010	46	9	408	209	0.0453809
BK.IR.010	BK.IR.006	46	9	209	408	0.0453809
NZ.IR.006	NZ.LC.002	369	134	1085	1146	0.0452712
NZ.LC.002	NZ.IR.006	369	134	1146	1085	0.0452712
SY.IR.2.002	SY.IR.2.005	396	146	1154	1145	0.0452371
SY.IR.2.005	SY.IR.2.002	396	146	1145	1154	0.0452371
SY.IR.2.003	SY.LC.2.005	398	147	1161	1144	0.0451193
SY.LC.2.005	SY.IR.2.003	398	147	1144	1161	0.0451193
NZ.IR.006	NZ.IR.009	388	143	1085	1190	0.0448352
NZ.IR.009	NZ.IR.006	388	143	1190	1085	0.0448352
BL.IR.016	BL.IR.030	338	122	992	1108	0.0447619
BL.IR.030	BL.IR.016	338	122	1108	992	0.0447619
SY.IR.2.001	SY.LC.2.006	363	131	1136	1158	0.0440279
SY.LC.2.006	SY.IR.2.001	363	131	1158	1136	0.0440279
NZ.LC.002	NZ.LC.M+1.010	384	141	1146	1176	0.0439276
NZ.LC.M+1.010	NZ.LC.002	384	141	1176	1146	0.0439276
SY.IR.2.002	SY.LC.2.007	371	135	1154	1149	0.0438558
SY.LC.2.007	SY.IR.2.002	371	135	1149	1154	0.0438558
NZ.IR.006	NZ.LC.001	389	146	1085	1132	0.0437528
NZ.LC.001	NZ.IR.006	389	146	1132	1085	0.0437528
BL.IR.011	BL.IR.016	311	113	967	992	0.0433895
BL.IR.016	BL.IR.011	311	113	992	967	0.0433895
NZ.IR.005	SY.IR.2.001	366	135	1088	1136	0.0431655
SY.IR.2.001	NZ.IR.005	366	135	1136	1088	0.0431655
BL.IR.016	BL.IR.018	360	135	992	1110	0.0428164
BL.IR.018	BL.IR.016	360	135	1110	992	0.0428164
BL.IR.033	NZ.IR.006	394	150	1123	1085	0.0425725
NZ.IR.006	BL.IR.033	394	150	1085	1123	0.0425725
EB.LC.001	NZ.LC.001	208	68	593	1132	0.0417391
NZ.LC.001	EB.LC.001	208	68	1132	593	0.0417391
NZ.LC.M+1.009	NZ.LC.M+1.010	360	134	1034	1176	0.041629
NZ.LC.M+1.010	NZ.LC.M+1.009	360	134	1176	1034	0.041629
BL.IR.033	NZ.LC.002	326	116	1123	1146	0.0414279
NZ.LC.002	BL.IR.033	326	116	1146	1123	0.0414279
BK.IR.007	BL.IR.012	269	96	1103	756	0.0414201
BL.IR.012	BK.IR.007	269	96	756	1103	0.0414201
BL.IR.033	EB.LC.001	191	60	1123	593	0.0413753
EB.LC.001	BL.IR.033	191	60	593	1123	0.0413753
NZ.IR.007	NZ.LC.002	322	117	1003	1146	0.0409493
NZ.LC.002	NZ.IR.007	322	117	1146	1003	0.0409493
EB.IR.005	EB.LC.002	343	130	977	1056	0.0408264
EB.LC.002	EB.IR.005	343	130	1056	977	0.0408264
EB.LC.001	EB.LC.010	202	68	593	1047	0.0402439
EB.LC.010	EB.LC.001	202	68	1047	593	0.0402439
EB.LC.001	WL.IR.024	190	62	593	1064	0.039831
WL.IR.024	EB.LC.001	190	62	1064	593	0.039831
EB.LC.001	EB.LC.003	203	69	593	1041	0.0397797
EB.LC.003	EB.LC.001	203	69	1041	593	0.0397797
NZ.LC.002	WL.IR.020	327	119	1146	1095	0.0397144
WL.IR.020	NZ.LC.002	327	119	1095	1146	0.0397144
BK.IR.007	BK.IR.009	268	98	1103	740	0.0390667
BK.IR.009	BK.IR.007	268	98	740	1103	0.0390667
NZ.LC.002	SY.IR.2.001	345	128	1146	1136	0.0390009
SY.IR.2.001	NZ.LC.002	345	128	1136	1146	0.0390009
BK.IR.013	BK.IR.020	359	141	954	1023	0.0389479
BK.IR.020	BK.IR.013	359	141	1023	954	0.0389479
NZ.LC.M+1.010	SY.IR.2.001	350	130	1176	1136	0.0389273
SY.IR.2.001	NZ.LC.M+1.010	350	130	1136	1176	0.0389273
EB.IR.003	EB.IR.006	369	144	1046	1071	0.0382617
EB.IR.006	EB.IR.003	369	144	1071	1046	0.0382617
BK.IR.007	BL.IR.001	238	85	1103	680	0.038138
BL.IR.001	BK.IR.007	238	85	680	1103	0.038138
BK.IR.012	BK.IR.018	48	12	485	145	0.0380952
BK.IR.018	BK.IR.012	48	12	145	485	0.0380952
BK.IR.012	NZ.LC.002	173	56	485	1146	0.0374004
NZ.LC.002	BK.IR.012	173	56	1146	485	0.0374004
EB.IR.003	EB.IR.008	349	137	1046	960	0.0373878
EB.IR.008	EB.IR.003	349	137	960	1046	0.0373878
EB.IR.002	EB.IR.005	340	132	1070	977	0.0371275
EB.IR.005	EB.IR.002	340	132	977	1070	0.0371275
SY.IR.2.002	SY.LC.2.004	342	129	1154	1139	0.0366332
SY.LC.2.004	SY.IR.2.002	342	129	1139	1154	0.0366332
NZ.LC.002	NZ.LC.M+1.007	337	129	1146	1016	0.0365402
NZ.LC.M+1.007	NZ.LC.002	337	129	1016	1146	0.0365402
EB.IR.003	EB.IR.005	323	125	1046	977	0.036085
EB.IR.005	EB.IR.003	323	125	977	1046	0.036085
WL.IR.012	WL.IR.020	376	149	1088	1095	0.0357306
WL.IR.020	WL.IR.012	376	149	1095	1088	0.0357306
WL.IR.020	WL.IR.024	365	144	1095	1064	0.0356647
WL.IR.024	WL.IR.020	365	144	1064	1095	0.0356647
NZ.IR.005	SY.IR.2.005	399	160	1088	1145	0.0353784
SY.IR.2.005	NZ.IR.005	399	160	1145	1088	0.0353784
BL.IR.014	NZ.IR.009	391	156	1092	1190	0.0346188
NZ.IR.009	BL.IR.014	391	156	1190	1092	0.0346188
NZ.IR.009	WL.IR.024	376	149	1190	1064	0.0346051
WL.IR.024	NZ.IR.009	376	149	1064	1190	0.0346051
NZ.LC.002	WL.IR.018	376	150	1146	1075	0.0342188
WL.IR.018	NZ.LC.002	376	150	1075	1146	0.0342188
BL.IR.015	NZ.LC.002	357	141	1046	1146	0.0342153
NZ.LC.002	BL.IR.015	357	141	1146	1046	0.0342153
BK.IR.005	BK.IR.018	56	9	969	145	0.0341113
BK.IR.018	BK.IR.005	56	9	145	969	0.0341113
EB.LC.003	NZ.IR.009	358	141	1041	1190	0.0340654
NZ.IR.009	EB.LC.003	358	141	1190	1041	0.0340654
EB.LC.001	NZ.IR.006	195	69	593	1085	0.033969
NZ.IR.006	EB.LC.001	195	69	1085	593	0.033969
BL.IR.018	NZ.LC.002	340	132	1110	1146	0.0336879
NZ.LC.002	BL.IR.018	340	132	1146	1110	0.0336879
BL.IR.001	SY.LC.2.005	221	80	680	1144	0.033443
SY.LC.2.005	BL.IR.001	221	80	1144	680	0.033443
NZ.LC.002	NZ.LC.005	298	115	1146	968	0.0321665
NZ.LC.005	NZ.LC.002	298	115	968	1146	0.0321665
NZ.IR.009	WL.IR.022	379	153	1190	1100	0.0318777
WL.IR.022	NZ.IR.009	379	153	1100	1190	0.0318777
BL.IR.001	BL.IR.018	221	82	680	1110	0.0318436
BL.IR.018	BL.IR.001	221	82	1110	680	0.0318436
BK.IR.009	BK.IR.018	56	14	740	145	0.0316384
BK.IR.018	BK.IR.009	56	14	145	740	0.0316384
BL.IR.014	NZ.LC.002	330	130	1092	1146	0.0312779
NZ.LC.002	BL.IR.014	330	130	1146	1092	0.0312779
EB.IR.005	NZ.LC.002	316	125	977	1146	0.0310881
NZ.LC.002	EB.IR.005	316	125	1146	977	0.0310881
BK.IR.010	BK.IR.018	23	6	209	145	0.0310734
BK.IR.018	BK.IR.010	23	6	145	209	0.0310734
BL.IR.001	BL.IR.033	230	87	680	1123	0.0310593
BL.IR.033	BL.IR.001	230	87	1123	680	0.0310593
SY.IR.2.003	SY.LC.2.006	386	157	1161	1158	0.0310479
SY.LC.2.006	SY.IR.2.003	386	157	1158	1161	0.0310479
BL.IR.033	NZ.LC.006	401	166	1123	1130	0.0306258
NZ.LC.006	BL.IR.033	401	166	1130	1123	0.0306258
NZ.LC.002	SY.LC.1.011	344	138	1146	1076	0.0306031
SY.LC.1.011	NZ.LC.002	344	138	1076	1146	0.0306031
BL.IR.018	SY.IR.2.005	383	157	1110	1145	0.0305987
SY.IR.2.005	BL.IR.018	383	157	1145	1110	0.0305987
BL.IR.012	NZ.LC.002	244	93	756	1146	0.0304942
NZ.LC.002	BL.IR.012	244	93	1146	756	0.0304942
SY.IR.2.004	SY.LC.2.006	373	152	1107	1158	0.0304636
SY.LC.2.006	SY.IR.2.004	373	152	1158	1107	0.0304636
NZ.LC.002	NZ.LC.006	371	151	1146	1130	0.0303163
NZ.LC.006	NZ.LC.002	371	151	1130	1146	0.0303163
EB.IR.002	EB.IR.008	325	132	1070	960	0.0300493
EB.IR.008	EB.IR.002	325	132	960	1070	0.0300493
BL.IR.033	WL.IR.020	360	147	1123	1095	0.0297565
WL.IR.020	BL.IR.033	360	147	1095	1123	0.0297565
NZ.IR.009	NZ.LC.M+1.009	386	160	1190	1034	0.0296763
NZ.LC.M+1.009	NZ.IR.009	386	160	1034	1190	0.0296763
BK.IR.009	BK.IR.010	66	19	740	209	0.0295047
BK.IR.010	BK.IR.009	66	19	209	740	0.0295047
BL.IR.033	EB.LC.010	370	153	1123	1047	0.0294931
EB.LC.010	BL.IR.033	370	153	1047	1123	0.0294931
BK.IR.007	EB.LC.001	214	82	1103	593	0.0294811
EB.LC.001	BK.IR.007	214	82	593	1103	0.0294811
BK.IR.015	NZ.IR.009	362	149	996	1190	0.0292772
NZ.IR.009	BK.IR.015	362	149	1190	996	0.0292772
SY.IR.2.005	SY.LC.1.011	401	168	1145	1076	0.0292661
SY.LC.1.011	SY.IR.2.005	401	168	1076	1145	0.0292661
NZ.IR.007	NZ.IR.009	362	149	1003	1190	0.0291838
NZ.IR.009	NZ.IR.007	362	149	1190	1003	0.0291838
SY.IR.2.001	WL.IR.020	347	141	1136	1095	0.0291349
WL.IR.020	SY.IR.2.001	347	141	1095	1136	0.0291349
BK.IR.007	NZ.LC.006	383	159	1103	1130	0.0291088
NZ.LC.006	BK.IR.007	383	159	1130	1103	0.0291088
EB.LC.003	WL.IR.020	336	137	1041	1095	0.0290262
WL.IR.020	EB.LC.003	336	137	1095	1041	0.0290262
BK.IR.010	NZ.LC.002	75	18	209	1146	0.0287823
NZ.LC.002	BK.IR.010	75	18	1146	209	0.0287823
BL.IR.012	WL.IR.022	251	99	756	1100	0.028556
WL.IR.022	BL.IR.012	251	99	1100	756	0.028556
BK.IR.001	BK.IR.010	65	20	672	209	0.0283768
BK.IR.010	BK.IR.001	65	20	209	672	0.0283768
SY.IR.2.002	SY.LC.2.006	373	154	1154	1158	0.0281142
SY.LC.2.006	SY.IR.2.002	373	154	1158	1154	0.0281142
BL.IR.001	SY.IR.2.001	215	82	680	1136	0.0280837
SY.IR.2.001	BL.IR.001	215	82	1136	680	0.0280837
BK.IR.007	NZ.LC.002	351	144	1103	1146	0.0280124
NZ.LC.002	BK.IR.007	351	144	1146	1103	0.0280124
NZ.LC.002	WL.IR.016	304	122	1146	1003	0.02792
WL.IR.016	NZ.LC.002	304	122	1003	1146	0.02792
BK.IR.018	BL.IR.001	47	12	145	680	0.0278788
BL.IR.001	BK.IR.018	47	12	680	145	0.0278788
NZ.IR.009	SY.IR.2.005	415	175	1190	1145	0.0278373
SY.IR.2.005	NZ.IR.009	415	175	1145	1190	0.0278373
NZ.LC.006	NZ.LC.M+1.009	340	140	1130	1034	0.0277264
NZ.LC.M+1.009	NZ.LC.006	340	140	1034	1130	0.0277264
BL.IR.001	WL.IR.012	219	85	680	1088	0.0277149
WL.IR.012	BL.IR.001	219	85	1088	680	0.0277149
SY.IR.2.001	SY.LC.1.011	371	155	1136	1076	0.0275769
SY.LC.1.011	SY.IR.2.001	371	155	1076	1136	0.0275769
BL.IR.001	EB.LC.001	119	42	680	593	0.0274941
EB.LC.001	BL.IR.001	119	42	593	680	0.0274941
NZ.IR.004	NZ.LC.002	338	139	1040	1146	0.0274474
NZ.LC.002	NZ.IR.004	338	139	1146	1040	0.0274474
NZ.IR.005	SY.IR.2.002	351	145	1088	1154	0.0272079
SY.IR.2.002	NZ.IR.005	351	145	1154	1088	0.0272079
BL.IR.016	SY.IR.2.005	342	142	992	1145	0.0271409
SY.IR.2.005	BL.IR.016	342	142	1145	992	0.0271409
BK.IR.010	NZ.IR.006	73	19	209	1085	0.0270479
NZ.IR.006	BK.IR.010	73	19	1085	209	0.0270479
BK.IR.009	EB.LC.001	144	54	740	593	0.0270068
EB.LC.001	BK.IR.009	144	54	593	740	0.0270068
NZ.IR.004	NZ.LC.M+1.009	348	146	1040	1034	0.027001
NZ.LC.M+1.009	NZ.IR.004	348	146	1034	1040	0.027001
BK.IR.012	SY.IR.2.005	160	58	485	1145	0.0269939
SY.IR.2.005	BK.IR.012	160	58	1145	485	0.0269939
NZ.IR.002	NZ.IR.004	333	138	1090	1040	0.0267606
NZ.IR.004	NZ.IR.002	333	138	1040	1090	0.0267606
BK.IR.010	BK.IR.014	20	6	209	90	0.0267559
BK.IR.014	BK.IR.010	20	6	90	209	0.0267559
BK.IR.009	WL.IR.020	247	99	740	1095	0.026703
WL.IR.020	BK.IR.009	247	99	1095	740	0.026703
NZ.IR.005	NZ.LC.006	387	164	1088	1130	0.0266005
NZ.LC.006	NZ.IR.005	387	164	1130	1088	0.0266005
NZ.LC.M+1.009	NZ.LC.M+1.011	348	146	1034	1075	0.0265529
NZ.LC.M+1.011	NZ.LC.M+1.009	348	146	1075	1034	0.0265529
EB.LC.003	WL.IR.012	358	151	1041	1088	0.0263034
WL.IR.012	EB.LC.003	358	151	1088	1041	0.0263034
SY.IR.2.004	SY.LC.2.004	335	138	1107	1139	0.0262689
SY.LC.2.004	SY.IR.2.004	335	138	1139	1107	0.0262689
SY.IR.2.002	SY.IR.2.004	387	164	1154	1107	0.0260946
SY.IR.2.004	SY.IR.2.002	387	164	1107	1154	0.0260946
NZ.LC.006	SY.IR.2.001	355	148	1130	1136	0.0260371
SY.IR.2.001	NZ.LC.006	355	148	1136	1130	0.0260371
BK.IR.018	BL.IR.013	49	18	145	355	0.026
BL.IR.013	BK.IR.018	49	18	355	145	0.026
BK.IR.001	BK.IR.012	134	52	672	485	0.0259291
BK.IR.012	BK.IR.001	134	52	485	672	0.0259291
BK.IR.007	SY.IR.2.005	378	160	1103	1145	0.0258007
SY.IR.2.005	BK.IR.007	378	160	1145	1103	0.0258007
SY.IR.2.002	SY.LC.2.001	290	116	1154	1107	0.0256524
SY.LC.2.001	SY.IR.2.002	290	116	1107	1154	0.0256524
BK.IR.002	BK.IR.018	45	9	908	145	0.025641
BK.IR.018	BK.IR.002	45	9	145	908	0.025641
BK.IR.007	BL.IR.033	371	157	1103	1123	0.0256065
BL.IR.033	BK.IR.007	371	157	1123	1103	0.0256065
BL.IR.030	BL.IR.033	361	152	1108	1123	0.0255491
BL.IR.033	BL.IR.030	361	152	1123	1108	0.0255491
NZ.IR.002	NZ.IR.009	342	142	1090	1190	0.0254386
NZ.IR.009	NZ.IR.002	342	142	1190	1090	0.0254386
BL.IR.033	WL.IR.012	370	157	1123	1088	0.0253279
WL.IR.012	BL.IR.033	370	157	1088	1123	0.0253279
NZ.LC.M+1.010	SY.IR.2.002	371	156	1176	1154	0.0253219
SY.IR.2.002	NZ.LC.M+1.010	371	156	1154	1176	0.0253219
EB.LC.001	NZ.IR.009	211	83	593	1190	0.0252384
NZ.IR.009	EB.LC.001	211	83	1190	593	0.0252384
WL.IR.012	WL.IR.022	373	159	1088	1100	0.0251371
WL.IR.022	WL.IR.012	373	159	1100	1088	0.0251371
BL.IR.001	NZ.IR.009	235	94	680	1190	0.0251337
NZ.IR.009	BL.IR.001	235	94	1190	680	0.0251337
WL.IR.012	WL.IR.024	346	146	1088	1064	0.0250929
WL.IR.024	WL.IR.012	346	146	1064	1088	0.0250929
NZ.LC.M+1.010	SY.IR.2.005	414	178	1176	1145	0.0249892
SY.IR.2.005	NZ.LC.M+1.010	414	178	1145	1176	0.0249892
EB.LC.001	WL.IR.012	186	72	593	1088	0.0249851
WL.IR.012	EB.LC.001	186	72	1088	593	0.0249851
BL.IR.018	WL.IR.024	318	132	1110	1064	0.024839
WL.IR.024	BL.IR.018	318	132	1064	1110	0.024839
SY.IR.2.002	SY.LC.1.011	403	174	1154	1076	0.0246637
SY.LC.1.011	SY.IR.2.002	403	174	1076	1154	0.0246637
NZ.LC.M+1.010	WL.IR.022	410	177	1176	1100	0.0246046
WL.IR.022	NZ.LC.M+1.010	410	177	1100	1176	0.0246046
BK.IR.001	EB.LC.001	145	57	672	593	0.0245059
EB.LC.001	BK.IR.001	145	57	593	672	0.0245059
BL.IR.001	BL.IR.012	189	77	680	756	0.0243733
BL.IR.012	BL.IR.001	189	77	756	680	0.0243733
BL.IR.001	NZ.LC.001	228	92	680	1132	0.0242826
NZ.LC.001	BL.IR.001	228	92	1132	680	0.0242826
EB.LC.003	WL.IR.024	337	143	1041	1064	0.024228
WL.IR.024	EB.LC.003	337	143	1064	1041	0.024228
BL.IR.018	BL.IR.033	356	151	1110	1123	0.0241827
BL.IR.033	BL.IR.018	356	151	1123	1110	0.0241827
NZ.IR.007	SY.LC.1.001	328	139	1003	1067	0.0241546
SY.LC.1.001	NZ.IR.007	328	139	1067	1003	0.0241546
SY.LC.1.001	SY.LC.2.004	357	152	1067	1139	0.0240254
SY.LC.2.004	SY.LC.1.001	357	152	1139	1067	0.0240254
NZ.LC.002	SY.IR.2.002	345	145	1146	1154	0.023913
SY.IR.2.002	NZ.LC.002	345	145	1154	1146	0.023913
BK.IR.010	SY.IR.2.001	70	19	209	1136	0.0237918
SY.IR.2.001	BK.IR.010	70	19	1136	209	0.0237918
BL.IR.003	NZ.LC.002	343	145	1083	1146	0.0237775
NZ.LC.002	BL.IR.003	343	145	1146	1083	0.0237775
EB.LC.003	NZ.LC.002	312	130	1041	1146	0.0237769
NZ.LC.002	EB.LC.003	312	130	1146	1041	0.0237769
NZ.IR.009	WL.IR.012	372	159	1190	1088	0.023705
WL.IR.012	NZ.IR.009	372	159	1088	1190	0.023705
BK.IR.018	BL.IR.033	58	14	145	1123	0.0236593
BL.IR.033	BK.IR.018	58	14	1123	145	0.0236593
BK.IR.012	EB.LC.003	170	67	485	1041	0.0235911
EB.LC.003	BK.IR.012	170	67	1041	485	0.0235911
BL.IR.012	BL.IR.023	240	98	756	1114	0.0235294
BL.IR.023	BL.IR.012	240	98	1114	756	0.0235294
SY.LC.1.015	SY.LC.2.004	291	120	1047	1139	0.0233303
SY.LC.2.004	SY.LC.1.015	291	120	1139	1047	0.0233303
BK.IR.007	NZ.IR.006	379	164	1103	1085	0.023309
NZ.IR.006	BK.IR.007	379	164	1085	1103	0.023309
EB.LC.010	NZ.LC.002	337	143	1047	1146	0.0232558
NZ.LC.002	EB.LC.010	337	143	1146	1047	0.0232558
BL.IR.023	WL.IR.020	347	148	1114	1095	0.0230874
WL.IR.020	BL.IR.023	347	148	1095	1114	0.0230874
SY.IR.2.004	SY.LC.2.001	335	142	1107	1107	0.0230352
SY.LC.2.001	SY.IR.2.004	335	142	1107	1107	0.0230352
BL.IR.015	SY.IR.2.001	336	143	1046	1136	0.0229148
SY.IR.2.001	BL.IR.015	336	143	1136	1046	0.0229148
BK.IR.010	BL.IR.012	52	15	209	756	0.0227979
BL.IR.012	BK.IR.010	52	15	756	209	0.0227979
SY.IR.2.001	WL.IR.018	352	151	1136	1075	0.0226142
WL.IR.018	SY.IR.2.001	352	151	1075	1136	0.0226142
NZ.IR.006	NZ.LC.006	410	180	1085	1130	0.0225734
NZ.LC.006	NZ.IR.006	410	180	1130	1085	0.0225734
BK.IR.010	EB.LC.003	70	21	209	1041	0.0224
EB.LC.003	BK.IR.010	70	21	1041	209	0.0224
EB.LC.002	NZ.LC.001	367	159	1056	1132	0.0223949
NZ.LC.001	EB.LC.002	367	159	1132	1056	0.0223949
NZ.IR.009	NZ.LC.001	386	167	1190	1132	0.0223945
NZ.LC.001	NZ.IR.009	386	167	1132	1190	0.0223945
NZ.LC.002	WL.IR.022	342	146	1146	1100	0.0222618
WL.IR.022	NZ.LC.002	342	146	1100	1146	0.0222618
BL.IR.030	NZ.LC.002	350	150	1108	1146	0.0221828
NZ.LC.002	BL.IR.030	350	150	1146	1108	0.0221828
BK.IR.007	BL.IR.030	361	156	1103	1108	0.0221619
BL.IR.030	BK.IR.007	361	156	1108	1103	0.0221619
BL.IR.003	SY.IR.2.001	357	154	1083	1136	0.022082
SY.IR.2.001	BL.IR.003	357	154	1136	1083	0.022082
BL.IR.032	SY.IR.2.001	345	148	1085	1136	0.0220621
SY.IR.2.001	BL.IR.032	345	148	1136	1085	0.0220621
BK.IR.009	BK.IR.012	121	47	740	485	0.0220408
BK.IR.012	BK.IR.009	121	47	485	740	0.0220408
NZ.IR.009	NZ.LC.006	379	164	1190	1130	0.0219828
NZ.LC.006	NZ.IR.009	379	164	1130	1190	0.0219828
EB.LC.001	SY.IR.2.001	184	73	593	1136	0.021978
SY.IR.2.001	EB.LC.001	184	73	1136	593	0.021978
NZ.LC.002	SY.LC.2.004	294	122	1146	1139	0.0218818
SY.LC.2.004	NZ.LC.002	294	122	1139	1146	0.0218818
BL.IR.018	NZ.IR.009	350	150	1110	1190	0.0217391
NZ.IR.009	BL.IR.018	350	150	1190	1110	0.0217391
SY.LC.1.001	SY.LC.2.001	333	143	1067	1107	0.0216191
SY.LC.2.001	SY.LC.1.001	333	143	1107	1067	0.0216191
BK.IR.009	WL.IR.024	233	97	740	1064	0.0216186
WL.IR.024	BK.IR.009	233	97	1064	740	0.0216186
BK.IR.012	NZ.IR.009	192	78	485	1190	0.0214925
NZ.IR.009	BK.IR.012	192	78	1190	485	0.0214925
EB.LC.001	NZ.LC.006	219	91	593	1130	0.0214742
NZ.LC.006	EB.LC.001	219	91	1130	593	0.0214742
EB.LC.001	WL.IR.025	187	76	593	1041	0.0214198
WL.IR.025	EB.LC.001	187	76	1041	593	0.0214198
NZ.LC.001	NZ.LC.M+1.009	364	159	1132	1034	0.0212373
NZ.LC.M+1.009	NZ.LC.001	364	159	1034	1132	0.0212373
BL.IR.023	WL.IR.024	338	146	1114	1064	0.0211203
WL.IR.024	BL.IR.023	338	146	1064	1114	0.0211203
BK.IR.010	BL.IR.033	70	21	209	1123	0.021021
BL.IR.033	BK.IR.010	70	21	1123	209	0.021021
EB.LC.001	WL.IR.018	193	79	593	1075	0.0209832
WL.IR.018	EB.LC.001	193	79	1075	593	0.0209832
EB.IR.001	EB.LC.001	171	68	1076	593	0.0209706
EB.LC.001	EB.IR.001	171	68	593	1076	0.0209706
BK.IR.015	BL.IR.001	217	91	996	680	0.0208831
BL.IR.001	BK.IR.015	217	91	680	996	0.0208831
BK.IR.009	NZ.LC.006	247	104	740	1130	0.0208556
NZ.LC.006	BK.IR.009	247	104	1130	740	0.0208556
EB.LC.010	WL.IR.012	376	166	1047	1088	0.0206089
WL.IR.012	EB.LC.010	376	166	1088	1047	0.0206089
NZ.IR.005	NZ.LC.002	370	162	1088	1146	0.0205909
NZ.LC.002	NZ.IR.005	370	162	1146	1088	0.0205909
BL.IR.012	WL.IR.020	230	96	756	1095	0.0205294
WL.IR.020	BL.IR.012	230	96	1095	756	0.0205294
BK.IR.009	EB.LC.003	228	96	740	1041	0.0202134
EB.LC.003	BK.IR.009	228	96	1041	740	0.0202134
BL.IR.001	SY.IR.2.002	223	93	680	1154	0.0201745
SY.IR.2.002	BL.IR.001	223	93	1154	680	0.0201745
BK.IR.012	WL.IR.003	150	60	485	1004	0.0201478
WL.IR.003	BK.IR.012	150	60	1004	485	0.0201478
BL.IR.001	SY.IR.2.004	196	80	680	1107	0.0201455
SY.IR.2.004	BL.IR.001	196	80	1107	680	0.0201455
BL.IR.015	EB.LC.001	179	73	1046	593	0.0201342
EB.LC.001	BL.IR.015	179	73	593	1046	0.0201342
BK.IR.015	NZ.LC.002	331	144	996	1146	0.0200747
NZ.LC.002	BK.IR.015	331	144	1146	996	0.0200747
BK.IR.019	NZ.LC.002	123	46	399	1146	0.0200647
NZ.LC.002	BK.IR.019	123	46	1146	399	0.0200647
BL.IR.009	BL.IR.018	314	136	998	1110	0.0199241
BL.IR.018	BL.IR.009	314	136	1110	998	0.0199241
BK.IR.006	BK.IR.018	23	6	408	145	0.0198915
BK.IR.018	BK.IR.006	23	6	145	408	0.0198915
NZ.IR.008	SY.LC.2.004	325	141	1028	1139	0.0198431
SY.LC.2.004	NZ.IR.008	325	141	1139	1028	0.0198431
NZ.IR.006	SY.IR.2.001	332	144	1085	1136	0.0198109
SY.IR.2.001	NZ.IR.006	332	144	1136	1085	0.0198109
BL.IR.012	WL.IR.024	230	97	756	1064	0.0197802
WL.IR.024	BL.IR.012	230	97	1064	756	0.0197802
NZ.IR.005	NZ.IR.009	397	176	1088	1190	0.0197542
NZ.IR.009	NZ.IR.005	397	176	1190	1088	0.0197542
BK.IR.009	BL.IR.001	158	65	740	680	0.0197183
BL.IR.001	BK.IR.009	158	65	680	740	0.0197183
BK.IR.009	NZ.IR.009	250	106	740	1190	0.0196891
NZ.IR.009	BK.IR.009	250	106	1190	740	0.0196891
BL.IR.014	SY.IR.2.005	374	165	1092	1145	0.0196692
SY.IR.2.005	BL.IR.014	374	165	1145	1092	0.0196692
WL.IR.003	WL.IR.020	343	151	1004	1095	0.0195331
WL.IR.020	WL.IR.003	343	151	1095	1004	0.0195331
BL.IR.015	BL.IR.030	348	153	1046	1108	0.0194986
BL.IR.030	BL.IR.015	348	153	1108	1046	0.0194986
BL.IR.033	SY.IR.2.001	338	147	1123	1136	0.0194776
SY.IR.2.001	BL.IR.033	338	147	1136	1123	0.0194776
NZ.LC.M+1.010	WL.IR.012	386	171	1176	1088	0.0194346
WL.IR.012	NZ.LC.M+1.010	386	171	1088	1176	0.0194346
BL.IR.016	BL.IR.031	323	143	992	926	0.0192909
BL.IR.031	BL.IR.016	323	143	926	992	0.0192909
NZ.IR.005	SY.IR.2.003	365	161	1088	1161	0.0191196
SY.IR.2.003	NZ.IR.005	365	161	1161	1088	0.0191196
BL.IR.023	WL.IR.012	328	143	1114	1088	0.0190736
WL.IR.012	BL.IR.023	328	143	1088	1114	0.0190736
BL.IR.032	EB.LC.001	170	69	1085	593	0.0190703
EB.LC.001	BL.IR.032	170	69	593	1085	0.0190703
BL.IR.001	SY.LC.2.003	188	77	680	1108	0.0190157
SY.LC.2.003	BL.IR.001	188	77	1108	680	0.0190157
EB.IR.002	WL.IR.020	349	154	1070	1095	0.0189376
WL.IR.020	EB.IR.002	349	154	1095	1070	0.0189376
BL.IR.003	SY.IR.2.005	384	171	1083	1145	0.018851
SY.IR.2.005	BL.IR.003	384	171	1145	1083	0.018851
NZ.IR.009	WL.IR.020	385	171	1190	1095	0.0188184
WL.IR.020	NZ.IR.009	385	171	1095	1190	0.0188184
BL.IR.014	SY.LC.2.007	340	149	1092	1149	0.0187416
SY.LC.2.007	BL.IR.014	340	149	1149	1092	0.0187416
BL.IR.030	NZ.IR.009	371	164	1108	1190	0.0187119
NZ.IR.009	BL.IR.030	371	164	1190	1108	0.0187119
EB.LC.001	NZ.LC.M+1.010	193	80	593	1176	0.0186546
NZ.LC.M+1.010	EB.LC.001	193	80	1176	593	0.0186546
BL.IR.012	EB.LC.001	133	54	756	593	0.0185322
EB.LC.001	BL.IR.012	133	54	593	756	0.0185322
BL.IR.012	SY.IR.2.001	247	106	756	1136	0.0184989
SY.IR.2.001	BL.IR.012	247	106	1136	756	0.0184989
BL.IR.015	BL.IR.033	358	159	1046	1123	0.0184417
BL.IR.033	BL.IR.015	358	159	1123	1046	0.0184417
EB.IR.001	WL.IR.020	344	152	1076	1095	0.0184247
WL.IR.020	EB.IR.001	344	152	1095	1076	0.0184247
EB.IR.005	WL.IR.020	304	133	977	1095	0.0183398
WL.IR.020	EB.IR.005	304	133	1095	977	0.0183398
BL.IR.033	NZ.IR.005	394	177	1123	1088	0.0180914
NZ.IR.005	BL.IR.033	394	177	1088	1123	0.0180914
BL.IR.001	WL.IR.020	208	88	680	1095	0.0180282
WL.IR.020	BL.IR.001	208	88	1095	680	0.0180282
BK.IR.018	BK.IR.020	53	16	145	1023	0.0179795
BK.IR.020	BK.IR.018	53	16	1023	145	0.0179795
BL.IR.001	SY.LC.2.001	200	84	680	1107	0.0179071
SY.LC.2.001	BL.IR.001	200	84	1107	680	0.0179071
WL.IR.016	WL.IR.024	303	133	1003	1064	0.0179003
WL.IR.024	WL.IR.016	303	133	1064	1003	0.0179003
BL.IR.032	WL.IR.020	367	164	1085	1095	0.0178899
WL.IR.020	BL.IR.032	367	164	1095	1085	0.0178899
EB.IR.005	EB.LC.001	188	80	977	593	0.0178344
EB.LC.001	EB.IR.005	188	80	593	977	0.0178344
BL.IR.012	EB.LC.003	228	98	756	1041	0.0178075
EB.LC.003	BL.IR.012	228	98	1041	756	0.0178075
BL.IR.014	EB.LC.001	206	88	1092	593	0.0178042
EB.LC.001	BL.IR.014	206	88	593	1092	0.0178042
BK.IR.010	SY.IR.2.005	70	23	209	1145	0.0177253
SY.IR.2.005	BK.IR.010	70	23	1145	209	0.0177253
NZ.IR.004	NZ.LC.001	354	158	1040	1132	0.0174954
NZ.LC.001	NZ.IR.004	354	158	1132	1040	0.0174954
BL.IR.001	BL.IR.014	205	87	680	1092	0.0174944
BL.IR.014	BL.IR.001	205	87	1092	680	0.0174944
BL.IR.001	EB.LC.003	186	78	680	1041	0.0174317
EB.LC.003	BL.IR.001	186	78	1041	680	0.0174317
BL.IR.003	BL.IR.012	238	103	1083	756	0.0174008
BL.IR.012	BL.IR.003	238	103	756	1083	0.0174008
BL.IR.033	NZ.LC.M+1.010	388	174	1123	1176	0.0173989
NZ.LC.M+1.010	BL.IR.033	388	174	1176	1123	0.0173989
BL.IR.001	SY.IR.2.003	204	86	680	1161	0.0173819
SY.IR.2.003	BL.IR.001	204	86	1161	680	0.0173819
NZ.LC.006	NZ.LC.M+1.011	368	165	1130	1075	0.0172336
NZ.LC.M+1.011	NZ.LC.006	368	165	1075	1130	0.0172336
BK.IR.001	BK.IR.013	210	91	672	954	0.0172202
BK.IR.013	BK.IR.001	210	91	954	672	0.0172202
BL.IR.012	BL.IR.015	235	102	756	1046	0.0172031
BL.IR.015	BL.IR.012	235	102	1046	756	0.0172031
BK.IR.012	WL.IR.012	161	67	485	1088	0.0171647
WL.IR.012	BK.IR.012	161	67	1088	485	0.0171647
BL.IR.001	NZ.IR.008	201	86	680	1028	0.0169789
NZ.IR.008	BL.IR.001	201	86	1028	680	0.0169789
SY.IR.2.004	SY.LC.2.005	370	166	1107	1144	0.0168814
SY.LC.2.005	SY.IR.2.004	370	166	1144	1107	0.0168814
SY.IR.2.002	SY.LC.2.003	328	145	1154	1108	0.0167993
SY.LC.2.003	SY.IR.2.002	328	145	1108	1154	0.0167993
BK.IR.009	BK.IR.015	225	98	740	996	0.0167051
BK.IR.015	BK.IR.009	225	98	996	740	0.0167051
BK.IR.009	EB.IR.006	232	101	740	1071	0.0165654
EB.IR.006	BK.IR.009	232	101	1071	740	0.0165654
EB.IR.001	EB.IR.005	296	131	1076	977	0.0165611
EB.IR.005	EB.IR.001	296	131	977	1076	0.0165611
BL.IR.001	EB.LC.004	175	74	680	954	0.0165239
EB.LC.004	BL.IR.001	175	74	954	680	0.0165239
NZ.IR.008	SY.IR.2.003	352	158	1028	1161	0.0164459
SY.IR.2.003	NZ.IR.008	352	158	1161	1028	0.0164459
BL.IR.033	WL.IR.018	378	171	1123	1075	0.0163785
WL.IR.018	BL.IR.033	378	171	1075	1123	0.0163785
BK.IR.018	EB.LC.001	42	15	145	593	0.0162602
EB.LC.001	BK.IR.018	42	15	593	145	0.0162602
BK.IR.007	BL.IR.023	352	158	1103	1114	0.0162382
BL.IR.023	BK.IR.007	352	158	1114	1103	0.0162382
BL.IR.015	BL.IR.018	321	143	1046	1110	0.0162338
BL.IR.018	BL.IR.015	321	143	1110	1046	0.0162338
BK.IR.010	EB.LC.001	59	23	209	593	0.0162095
EB.LC.001	BK.IR.010	59	23	593	209	0.0162095
NZ.IR.004	NZ.IR.007	323	145	1040	1003	0.0161527
NZ.IR.007	NZ.IR.004	323	145	1003	1040	0.0161527
BL.IR.030	WL.IR.024	335	150	1108	1064	0.0161142
WL.IR.024	BL.IR.030	335	150	1064	1108	0.0161142
NZ.IR.009	SY.LC.2.001	351	157	1190	1107	0.016108
SY.LC.2.001	NZ.IR.009	351	157	1107	1190	0.016108
BK.IR.009	BL.IR.033	254	112	740	1123	0.0161031
BL.IR.033	BK.IR.009	254	112	1123	740	0.0161031
BL.IR.023	BL.IR.033	350	157	1114	1123	0.016093
BL.IR.033	BL.IR.023	350	157	1123	1114	0.016093
NZ.LC.002	SY.LC.2.001	306	135	1146	1107	0.0159787
SY.LC.2.001	NZ.LC.002	306	135	1107	1146	0.0159787
EB.LC.001	WL.IR.011	182	78	593	1037	0.0159509
WL.IR.011	EB.LC.001	182	78	1037	593	0.0159509
BL.IR.001	BL.IR.003	208	90	680	1083	0.015882
BL.IR.003	BL.IR.001	208	90	1083	680	0.015882
EB.IR.002	NZ.LC.002	335	150	1070	1146	0.0157942
NZ.LC.002	EB.IR.002	335	150	1146	1070	0.0157942
BK.IR.010	BL.IR.001	50	18	209	680	0.015748
BL.IR.001	BK.IR.010	50	18	680	209	0.015748
BK.IR.007	SY.IR.2.001	343	154	1103	1136	0.015632
SY.IR.2.001	BK.IR.007	343	154	1136	1103	0.015632
BK.IR.007	SY.LC.2.004	329	147	1103	1139	0.0156111
SY.LC.2.004	BK.IR.007	329	147	1139	1103	0.0156111
BL.IR.014	WL.IR.020	364	165	1092	1095	0.0155464
BL.IR.033	WL.IR.024	346	156	1123	1064	0.0155464
WL.IR.020	BL.IR.014	364	165	1095	1092	0.0155464
WL.IR.024	BL.IR.033	346	156	1064	1123	0.0155464
BL.IR.003	EB.LC.001	188	81	1083	593	0.0155131
EB.LC.001	BL.IR.003	188	81	593	1083	0.0155131
EB.LC.003	WL.IR.011	366	167	1041	1037	0.0153994
WL.IR.011	EB.LC.003	366	167	1037	1041	0.0153994
BL.IR.034	WL.IR.021	197	86	609	1022	0.015328
WL.IR.021	BL.IR.034	197	86	1022	609	0.015328
BL.IR.001	NZ.IR.006	205	89	680	1085	0.0152975
NZ.IR.006	BL.IR.001	205	89	1085	680	0.0152975
BL.IR.033	EB.LC.003	345	156	1123	1041	0.0152495
EB.LC.003	BL.IR.033	345	156	1041	1123	0.0152495
BK.IR.015	BL.IR.030	324	146	996	1108	0.0152091
BL.IR.030	BK.IR.015	324	146	1108	996	0.0152091
EB.LC.003	SY.IR.2.001	313	140	1041	1136	0.0151585
SY.IR.2.001	EB.LC.003	313	140	1136	1041	0.0151585
BL.IR.030	SY.IR.2.001	312	139	1108	1136	0.0151515
SY.IR.2.001	BL.IR.030	312	139	1136	1108	0.0151515
BL.IR.014	SY.LC.2.006	350	158	1092	1158	0.0151111
SY.LC.2.006	BL.IR.014	350	158	1158	1092	0.0151111
BK.IR.007	NZ.IR.009	374	170	1103	1190	0.0148277
NZ.IR.009	BK.IR.007	374	170	1190	1103	0.0148277
BK.IR.018	SY.IR.2.005	53	17	145	1145	0.0147287
SY.IR.2.005	BK.IR.018	53	17	1145	145	0.0147287
BL.IR.014	WL.IR.012	352	160	1092	1088	0.0146789
WL.IR.012	BL.IR.014	352	160	1088	1092	0.0146789
NZ.IR.009	WL.IR.003	364	166	1190	1004	0.0145852
WL.IR.003	NZ.IR.009	364	166	1004	1190	0.0145852
BL.IR.030	BL.IR.034	193	84	1108	609	0.0145603
BL.IR.034	BL.IR.030	193	84	609	1108	0.0145603
EB.LC.001	EB.LC.002	180	78	593	1056	0.0145543
EB.LC.002	EB.LC.001	180	78	1056	593	0.0145543
BL.IR.001	BL.IR.015	189	82	680	1046	0.0144844
BL.IR.015	BL.IR.001	189	82	1046	680	0.0144844
BL.IR.030	NZ.LC.M+1.010	337	152	1108	1176	0.0144483
NZ.LC.M+1.010	BL.IR.030	337	152	1176	1108	0.0144483
BL.IR.011	BL.IR.018	316	143	967	1110	0.0144439
BL.IR.018	BL.IR.011	316	143	1110	967	0.0144439
BL.IR.014	SY.LC.2.004	318	143	1092	1139	0.0143433
SY.LC.2.004	BL.IR.014	318	143	1139	1092	0.0143433
BK.IR.009	SY.LC.1.011	240	107	740	1076	0.0143172
SY.LC.1.011	BK.IR.009	240	107	1076	740	0.0143172
BL.IR.030	NZ.IR.006	353	161	1108	1085	0.0141359
NZ.IR.006	BL.IR.030	353	161	1085	1108	0.0141359
NZ.IR.002	SY.LC.2.004	325	147	1090	1139	0.0139076
SY.LC.2.004	NZ.IR.002	325	147	1139	1090	0.0139076
EB.LC.003	EB.LC.010	333	152	1041	1047	0.0138889
EB.LC.010	EB.LC.003	333	152	1047	1041	0.0138889
EB.LC.003	NZ.LC.006	344	157	1041	1130	0.0138185
NZ.LC.006	EB.LC.003	344	157	1130	1041	0.0138185
BL.IR.001	BL.IR.016	179	78	680	992	0.013756
BL.IR.016	BL.IR.001	179	78	992	680	0.013756
EB.IR.002	EB.IR.003	337	154	1070	1046	0.0137051
EB.IR.003	EB.IR.002	337	154	1046	1070	0.0137051
NZ.LC.001	SY.IR.2.001	353	161	1132	1136	0.0136684
SY.IR.2.001	NZ.LC.001	353	161	1136	1132	0.0136684
BL.IR.014	BL.IR.030	356	163	1092	1108	0.0136364
BL.IR.030	BL.IR.014	356	163	1108	1092	0.0136364
NZ.IR.008	SY.LC.2.003	325	148	1028	1108	0.0135768
SY.LC.2.003	NZ.IR.008	325	148	1108	1028	0.0135768
BK.IR.012	BK.IR.019	88	38	485	399	0.0135747
BK.IR.019	BK.IR.012	88	38	399	485	0.0135747
NZ.IR.002	SY.LC.1.015	335	153	1090	1047	0.0135704
SY.LC.1.015	NZ.IR.002	335	153	1047	1090	0.0135704
BL.IR.014	BL.IR.034	199	88	1092	609	0.0135215
BL.IR.034	BL.IR.014	199	88	609	1092	0.0135215
BK.IR.007	BL.IR.015	333	152	1103	1046	0.0134946
BL.IR.015	BK.IR.007	333	152	1046	1103	0.0134946
BL.IR.001	NZ.LC.M+1.010	215	95	680	1176	0.0134698
NZ.LC.M+1.010	BL.IR.001	215	95	1176	680	0.0134698
SY.IR.2.004	SY.LC.1.015	333	152	1107	1047	0.0134633
SY.LC.1.015	SY.IR.2.004	333	152	1047	1107	0.0134633
NZ.IR.002	NZ.LC.002	298	134	1090	1146	0.0134168
NZ.LC.002	NZ.IR.002	298	134	1146	1090	0.0134168
NZ.IR.008	SY.IR.2.001	309	140	1028	1136	0.0134011
SY.IR.2.001	NZ.IR.008	309	140	1136	1028	0.0134011
NZ.IR.009	WL.IR.018	396	183	1190	1075	0.013245
WL.IR.018	NZ.IR.009	396	183	1075	1190	0.013245
BL.IR.001	EB.IR.002	209	93	680	1070	0.0131429
EB.IR.002	BL.IR.001	209	93	1070	680	0.0131429
NZ.LC.001	NZ.LC.M+1.011	333	152	1132	1075	0.01314
NZ.LC.M+1.011	NZ.LC.001	333	152	1075	1132	0.01314
SY.IR.2.005	SY.LC.2.004	332	151	1145	1139	0.0131349
SY.LC.2.004	SY.IR.2.005	332	151	1139	1145	0.0131349
BL.IR.015	NZ.IR.005	368	170	1046	1088	0.0131209
NZ.IR.005	BL.IR.015	368	170	1088	1046	0.0131209
BK.IR.012	BL.IR.033	165	72	485	1123	0.0130597
BL.IR.033	BK.IR.012	165	72	1123	485	0.0130597
BK.IR.010	NZ.LC.M+1.010	76	29	209	1176	0.0129964
NZ.LC.M+1.010	BK.IR.010	76	29	1176	209	0.0129964
BK.IR.009	BL.IR.018	212	94	740	1110	0.012973
BL.IR.018	BK.IR.009	212	94	1110	740	0.012973
BK.IR.012	BL.IR.001	119	52	485	680	0.0128755
BL.IR.001	BK.IR.012	119	52	680	485	0.0128755
BL.IR.023	NZ.LC.002	339	155	1114	1146	0.0128319
NZ.LC.002	BL.IR.023	339	155	1146	1114	0.0128319
NZ.IR.009	SY.LC.1.011	391	181	1190	1076	0.0127979
SY.LC.1.011	NZ.IR.009	391	181	1076	1190	0.0127979
BL.IR.033	SY.IR.2.005	359	165	1123	1145	0.0127866
SY.IR.2.005	BL.IR.033	359	165	1145	1123	0.0127866
BL.IR.009	NZ.LC.002	309	141	998	1146	0.0125933
NZ.LC.002	BL.IR.009	309	141	1146	998	0.0125933
BK.IR.018	BL.IR.011	52	19	145	967	0.0125899
BL.IR.011	BK.IR.018	52	19	967	145	0.0125899
NZ.LC.006	NZ.LC.M+1.010	377	174	1130	1176	0.0125759
NZ.LC.M+1.010	NZ.LC.006	377	174	1176	1130	0.0125759
BL.IR.034	WL.IR.016	200	90	609	1003	0.0124069
WL.IR.016	BL.IR.034	200	90	1003	609	0.0124069
BK.IR.018	NZ.LC.002	56	20	145	1146	0.0123935
NZ.LC.002	BK.IR.018	56	20	1146	145	0.0123935
EB.LC.002	EB.LC.010	352	163	1056	1047	0.0123633
EB.LC.010	EB.LC.002	352	163	1047	1056	0.0123633
SY.IR.2.004	WL.IR.012	339	156	1107	1088	0.0123007
WL.IR.012	SY.IR.2.004	339	156	1088	1107	0.0123007
BL.IR.030	WL.IR.012	329	151	1108	1088	0.0122951
WL.IR.012	BL.IR.030	329	151	1088	1108	0.0122951
BK.IR.003	BL.IR.001	159	70	868	680	0.0122739
BL.IR.001	BK.IR.003	159	70	680	868	0.0122739
BK.IR.007	WL.IR.022	371	172	1103	1100	0.012256
WL.IR.022	BK.IR.007	371	172	1100	1103	0.012256
BL.IR.014	EB.LC.003	330	152	1092	1041	0.0121894
EB.LC.003	BL.IR.014	330	152	1041	1092	0.0121894
NZ.LC.002	SY.IR.2.003	332	152	1146	1161	0.012137
SY.IR.2.003	NZ.LC.002	332	152	1161	1146	0.012137
BK.IR.012	EB.LC.001	119	53	485	593	0.0120594
EB.LC.001	BK.IR.012	119	53	593	485	0.0120594
WL.IR.012	WL.IR.018	374	174	1088	1075	0.0120203
WL.IR.018	WL.IR.012	374	174	1075	1088	0.0120203
NZ.LC.002	WL.IR.021	316	145	1146	1022	0.0119926
WL.IR.021	NZ.LC.002	316	145	1022	1146	0.0119926
EB.IR.002	NZ.IR.009	369	171	1070	1190	0.0119469
NZ.IR.009	EB.IR.002	369	171	1190	1070	0.0119469
EB.LC.004	NZ.LC.002	279	127	954	1146	0.0119048
NZ.LC.002	EB.LC.004	279	127	1146	954	0.0119048
EB.LC.001	WL.IR.020	186	83	593	1095	0.0118483
WL.IR.020	EB.LC.001	186	83	1095	593	0.0118483
BL.IR.012	BL.IR.030	214	96	756	1108	0.0118026
BL.IR.030	BL.IR.012	214	96	1108	756	0.0118026
NZ.IR.008	NZ.LC.M+1.010	378	176	1028	1176	0.0117967
NZ.LC.M+1.010	NZ.IR.008	378	176	1176	1028	0.0117967
BL.IR.001	NZ.LC.M+1.007	190	85	680	1016	0.0117925
NZ.LC.M+1.007	BL.IR.001	190	85	1016	680	0.0117925
BK.IR.010	SY.LC.1.001	69	27	209	1067	0.0117555
SY.LC.1.001	BK.IR.010	69	27	1067	209	0.0117555
BK.IR.010	SY.IR.2.002	74	29	209	1154	0.0117388
SY.IR.2.002	BK.IR.010	74	29	1154	209	0.0117388
EB.LC.001	EB.LC.006	176	79	593	943	0.0117188
EB.LC.006	EB.LC.001	176	79	943	593	0.0117188
BL.IR.023	EB.LC.001	184	82	1114	593	0.0117165
EB.LC.001	BL.IR.023	184	82	593	1114	0.0117165
NZ.LC.002	NZ.LC.M+1.011	306	140	1146	1075	0.0117064
NZ.LC.M+1.011	NZ.LC.002	306	140	1075	1146	0.0117064
EB.IR.002	WL.IR.003	330	153	1070	1004	0.0115718
WL.IR.003	EB.IR.002	330	153	1004	1070	0.0115718
BK.IR.010	WL.IR.003	62	24	209	1004	0.0115416
WL.IR.003	BK.IR.010	62	24	1004	209	0.0115416
BK.IR.010	SY.IR.2.004	65	25	209	1107	0.0113982
SY.IR.2.004	BK.IR.010	65	25	1107	209	0.0113982
EB.IR.005	EB.LC.003	301	139	977	1041	0.0113974
EB.LC.003	EB.IR.005	301	139	1041	977	0.0113974
BL.IR.030	NZ.IR.005	353	164	1108	1088	0.0113843
NZ.IR.005	BL.IR.030	353	164	1088	1108	0.0113843
BL.IR.014	BL.IR.023	353	164	1092	1114	0.0113327
BL.IR.023	BL.IR.014	353	164	1114	1092	0.0113327
BK.IR.009	BL.IR.023	219	99	740	1114	0.0113269
BL.IR.023	BK.IR.009	219	99	1114	740	0.0113269
EB.IR.003	WL.IR.018	340	158	1046	1075	0.0113154
WL.IR.018	EB.IR.003	340	158	1075	1046	0.0113154
BL.IR.033	WL.IR.022	363	169	1123	1100	0.0112461
WL.IR.022	BL.IR.033	363	169	1100	1123	0.0112461
BK.IR.007	EB.LC.010	346	161	1103	1047	0.0111628
EB.LC.010	BK.IR.007	346	161	1047	1103	0.0111628
BL.IR.018	SY.IR.2.001	299	137	1110	1136	0.0111309
SY.IR.2.001	BL.IR.018	299	137	1136	1110	0.0111309
BL.IR.011	EB.LC.001	177	80	967	593	0.0108974
EB.LC.001	BL.IR.011	177	80	593	967	0.0108974
NZ.IR.009	SY.LC.2.007	359	167	1190	1149	0.0106883
SY.LC.2.007	NZ.IR.009	359	167	1149	1190	0.0106883
BL.IR.001	WL.IR.022	221	101	680	1100	0.0106742
WL.IR.022	BL.IR.001	221	101	1100	680	0.0106742
BL.IR.014	WL.IR.024	347	162	1092	1064	0.0106679
WL.IR.024	BL.IR.014	347	162	1064	1092	0.0106679
BK.IR.009	SY.IR.2.001	218	99	740	1136	0.010661
SY.IR.2.001	BK.IR.009	218	99	1136	740	0.010661
BK.IR.018	BL.IR.032	49	18	145	1085	0.0105691
BL.IR.032	BK.IR.018	49	18	1085	145	0.0105691
BL.IR.033	EB.LC.002	357	167	1123	1056	0.0105553
EB.LC.002	BL.IR.033	357	167	1056	1123	0.0105553
NZ.IR.006	NZ.IR.007	344	161	1085	1003	0.0105364
NZ.IR.007	NZ.IR.006	344	161	1003	1085	0.0105364
BK.IR.018	WL.IR.020	47	17	145	1095	0.0104839
WL.IR.020	BK.IR.018	47	17	1095	145	0.0104839
NZ.LC.002	SY.IR.2.005	360	168	1146	1145	0.0104758
SY.IR.2.005	NZ.LC.002	360	168	1145	1146	0.0104758
BK.IR.010	BL.IR.015	49	18	209	1046	0.0103586
BL.IR.015	BK.IR.010	49	18	1046	209	0.0103586
BK.IR.010	EB.LC.010	69	28	209	1047	0.0103503
EB.LC.010	BK.IR.010	69	28	1047	209	0.0103503
BK.IR.015	NZ.LC.001	348	163	996	1132	0.0103383
NZ.LC.001	BK.IR.015	348	163	1132	996	0.0103383
NZ.LC.001	WL.IR.020	373	175	1132	1095	0.0103278
WL.IR.020	NZ.LC.001	373	175	1095	1132	0.0103278
BK.IR.008	BK.IR.018	37	13	922	145	0.0103093
BK.IR.018	BK.IR.008	37	13	145	922	0.0103093
EB.LC.010	WL.IR.020	358	168	1047	1095	0.0102708
WL.IR.020	EB.LC.010	358	168	1095	1047	0.0102708
BK.IR.007	EB.LC.003	336	157	1103	1041	0.0102612
EB.LC.003	BK.IR.007	336	157	1041	1103	0.0102612
BL.IR.001	WL.IR.018	208	95	680	1075	0.0102564
WL.IR.018	BL.IR.001	208	95	1075	680	0.0102564
BK.IR.015	NZ.LC.M+1.010	352	165	996	1176	0.0101289
NZ.LC.M+1.010	BK.IR.015	352	165	1176	996	0.0101289
EB.LC.001	WL.IR.016	162	73	593	1003	0.0100251
WL.IR.016	EB.LC.001	162	73	1003	593	0.0100251
BK.IR.002	BK.IR.014	32	11	908	90	0.01002
BK.IR.014	BK.IR.002	32	11	90	908	0.01002
NZ.IR.002	SY.LC.2.001	294	136	1090	1107	0.0100137
SY.LC.2.001	NZ.IR.002	294	136	1107	1090	0.0100137
BK.IR.010	NZ.IR.009	64	25	209	1190	0.0100071
NZ.IR.009	BK.IR.010	64	25	1190	209	0.0100071
BK.IR.018	BL.IR.012	37	14	145	756	0.0099889
BL.IR.012	BK.IR.018	37	14	756	145	0.0099889
BK.IR.007	BL.IR.018	350	164	1103	1110	0.00994126
BL.IR.018	BK.IR.007	350	164	1110	1103	0.00994126
NZ.IR.009	SY.IR.2.002	367	172	1190	1154	0.00981229
SY.IR.2.002	NZ.IR.009	367	172	1154	1190	0.00981229
BK.IR.006	WL.IR.014	127	57	408	942	0.00962963
WL.IR.014	BK.IR.006	127	57	942	408	0.00962963
BK.IR.007	BL.IR.003	361	170	1103	1083	0.00960659
BL.IR.003	BK.IR.007	361	170	1083	1103	0.00960659
EB.LC.003	SY.IR.2.005	327	153	1041	1145	0.00960659
SY.IR.2.005	EB.LC.003	327	153	1145	1041	0.00960659
BK.IR.007	WL.IR.012	363	171	1103	1088	0.00958466
WL.IR.012	BK.IR.007	363	171	1088	1103	0.00958466
SY.IR.2.003	SY.LC.1.015	329	154	1161	1047	0.00951087
SY.LC.1.015	SY.IR.2.003	329	154	1047	1161	0.00951087
SY.IR.2.004	SY.LC.2.003	321	150	1107	1108	0.00948081
SY.LC.2.003	SY.IR.2.004	321	150	1108	1107	0.00948081
EB.LC.003	NZ.LC.M+1.010	359	169	1041	1176	0.00947226
NZ.LC.M+1.010	EB.LC.003	359	169	1176	1041	0.00947226
EB.LC.001	WL.IR.022	182	83	593	1100	0.00945068
WL.IR.022	EB.LC.001	182	83	1100	593	0.00945068
SY.IR.2.001	WL.IR.012	331	155	1136	1088	0.00944245
WL.IR.012	SY.IR.2.001	331	155	1088	1136	0.00944245
BK.IR.012	WL.IR.016	122	54	485	1003	0.0094086
WL.IR.016	BK.IR.012	122	54	1003	485	0.0094086
BK.IR.012	BL.IR.023	147	66	485	1114	0.00938086
BL.IR.023	BK.IR.012	147	66	1114	485	0.00938086
SY.IR.2.005	SY.LC.2.001	347	163	1145	1107	0.00932504
SY.LC.2.001	SY.IR.2.005	347	163	1107	1145	0.00932504
NZ.IR.004	SY.LC.2.004	324	152	1040	1139	0.00917852
SY.LC.2.004	NZ.IR.004	324	152	1139	1040	0.00917852
BK.IR.010	WL.IR.022	64	26	209	1100	0.0091673
WL.IR.022	BK.IR.010	64	26	1100	209	0.0091673
BL.IR.018	WL.IR.020	362	171	1110	1095	0.00907029
WL.IR.020	BL.IR.018	362	171	1095	1110	0.00907029
EB.IR.008	SY.LC.2.004	281	131	960	1139	0.00905193
SY.LC.2.004	EB.IR.008	281	131	1139	960	0.00905193
NZ.LC.001	WL.IR.012	384	182	1132	1088	0.00900901
WL.IR.012	NZ.LC.001	384	182	1088	1132	0.00900901
BK.IR.014	BK.IR.020	24	7	90	1023	0.00898473
BK.IR.020	BK.IR.014	24	7	1023	90	0.00898473
EB.LC.002	WL.IR.018	373	177	1056	1075	0.008916
WL.IR.018	EB.LC.002	373	177	1075	1056	0.008916
BL.IR.001	SY.LC.2.004	184	84	680	1139	0.00879604
SY.LC.2.004	BL.IR.001	184	84	1139	680	0.00879604
BL.IR.001	WL.IR.011	213	99	680	1037	0.00873617
WL.IR.011	BL.IR.001	213	99	1037	680	0.00873617
EB.LC.001	NZ.IR.004	172	79	593	1040	0.00857318
NZ.IR.004	EB.LC.001	172	79	1040	593	0.00857318
BL.IR.015	NZ.LC.M+1.010	341	161	1046	1176	0.00855086
NZ.LC.M+1.010	BL.IR.015	341	161	1176	1046	0.00855086
BL.IR.032	NZ.LC.002	341	161	1085	1146	0.00851636
NZ.LC.002	BL.IR.032	341	161	1146	1085	0.00851636
BK.IR.014	BK.IR.018	12	5	90	145	0.00851064
BK.IR.018	BK.IR.014	12	5	145	90	0.00851064
NZ.LC.M+1.010	WL.IR.024	345	163	1176	1064	0.00848214
WL.IR.024	NZ.LC.M+1.010	345	163	1064	1176	0.00848214
BL.IR.001	SY.LC.2.002	191	88	680	1098	0.00843645
SY.LC.2.002	BL.IR.001	191	88	1098	680	0.00843645
EB.IR.002	WL.IR.022	348	165	1070	1100	0.00829493
WL.IR.022	EB.IR.002	348	165	1100	1070	0.00829493
EB.LC.010	SY.IR.2.001	334	158	1047	1136	0.00824553
SY.IR.2.001	EB.LC.010	334	158	1136	1047	0.00824553
BL.IR.030	WL.IR.020	336	159	1108	1095	0.00817068
WL.IR.020	BL.IR.030	336	159	1095	1108	0.00817068
EB.IR.001	NZ.LC.002	318	150	1076	1146	0.00810081
NZ.LC.002	EB.IR.001	318	150	1146	1076	0.00810081
EB.IR.001	EB.LC.003	325	154	1076	1041	0.00803023
EB.LC.003	EB.IR.001	325	154	1041	1076	0.00803023
BK.IR.009	BL.IR.012	142	65	740	756	0.00802139
BL.IR.012	BK.IR.009	142	65	756	740	0.00802139
SY.IR.2.002	SY.LC.2.002	318	150	1154	1098	0.0079929
SY.LC.2.002	SY.IR.2.002	318	150	1098	1154	0.0079929
BK.IR.018	BL.IR.023	56	23	145	1114	0.00794281
BL.IR.023	BK.IR.018	56	23	1114	145	0.00794281
NZ.LC.M+1.010	WL.IR.020	376	179	1176	1095	0.00792602
WL.IR.020	NZ.LC.M+1.010	376	179	1095	1176	0.00792602
BL.IR.032	WL.IR.012	349	166	1085	1088	0.00782329
WL.IR.012	BL.IR.032	349	166	1088	1085	0.00782329
BK.IR.007	NZ.IR.005	365	174	1103	1088	0.00775901
NZ.IR.005	BK.IR.007	365	174	1088	1103	0.00775901
EB.LC.001	EB.LC.004	144	66	593	954	0.00775695
EB.LC.004	EB.LC.001	144	66	954	593	0.00775695
BL.IR.001	SY.IR.2.005	218	102	680	1145	0.00767123
SY.IR.2.005	BL.IR.001	218	102	1145	680	0.00767123
BK.IR.009	WL.IR.012	244	115	740	1088	0.00765864
WL.IR.012	BK.IR.009	244	115	1088	740	0.00765864
BL.IR.018	EB.LC.001	173	80	1110	593	0.00763359
EB.LC.001	BL.IR.018	173	80	593	1110	0.00763359
EB.LC.002	NZ.IR.009	355	169	1056	1190	0.00756901
NZ.IR.009	EB.LC.002	355	169	1190	1056	0.00756901
BK.IR.007	BK.IR.020	332	158	1103	1023	0.00752587
BK.IR.020	BK.IR.007	332	158	1023	1103	0.00752587
BK.IR.012	BK.IR.015	143	66	485	996	0.00742741
BK.IR.015	BK.IR.012	143	66	996	485	0.00742741
BK.IR.010	WL.IR.016	59	25	209	1003	0.00742574
WL.IR.016	BK.IR.010	59	25	1003	209	0.00742574
BK.IR.012	SY.IR.2.001	142	65	485	1136	0.00740284
SY.IR.2.001	BK.IR.012	142	65	1136	485	0.00740284
BL.IR.033	NZ.IR.009	371	177	1123	1190	0.00734976
NZ.IR.009	BL.IR.033	371	177	1190	1123	0.00734976
EB.LC.001	SY.LC.1.015	176	82	593	1047	0.00731707
SY.LC.1.015	EB.LC.001	176	82	1047	593	0.00731707
BK.IR.010	SY.IR.2.003	54	22	209	1161	0.00729927
NZ.LC.M+1.007	NZ.LC.M+1.010	338	161	1016	1176	0.00729927
NZ.LC.M+1.010	NZ.LC.M+1.007	338	161	1176	1016	0.00729927
SY.IR.2.003	BK.IR.010	54	22	1161	209	0.00729927
BK.IR.013	BK.IR.018	48	20	954	145	0.00727934
BK.IR.018	BK.IR.013	48	20	145	954	0.00727934
SY.IR.2.001	SY.LC.1.001	310	147	1136	1067	0.00726282
SY.LC.1.001	SY.IR.2.001	310	147	1067	1136	0.00726282
BK.IR.008	EB.LC.001	153	71	922	593	0.00726073
EB.LC.001	BK.IR.008	153	71	593	922	0.00726073
EB.IR.002	WL.IR.012	361	173	1070	1088	0.00695088
WL.IR.012	EB.IR.002	361	173	1088	1070	0.00695088
BL.IR.023	NZ.IR.009	338	161	1114	1190	0.00694444
NZ.IR.009	BL.IR.023	338	161	1190	1114	0.00694444
BL.IR.012	BL.IR.033	233	110	756	1123	0.00691857
BL.IR.033	BL.IR.012	233	110	1123	756	0.00691857
BK.IR.020	NZ.LC.002	315	150	1023	1146	0.00691563
NZ.LC.002	BK.IR.020	315	150	1146	1023	0.00691563
EB.LC.001	SY.IR.2.005	188	88	593	1145	0.00690449
SY.IR.2.005	EB.LC.001	188	88	1145	593	0.00690449
BL.IR.014	NZ.IR.005	365	175	1092	1088	0.00688073
NZ.IR.005	BL.IR.014	365	175	1088	1092	0.00688073
NZ.LC.002	WL.IR.011	355	170	1146	1037	0.00687128
WL.IR.011	NZ.LC.002	355	170	1037	1146	0.00687128
NZ.LC.002	WL.IR.025	349	167	1146	1041	0.00685871
WL.IR.025	NZ.LC.002	349	167	1041	1146	0.00685871
BK.IR.018	WL.IR.021	50	21	145	1022	0.00685518
WL.IR.021	BK.IR.018	50	21	1022	145	0.00685518
BL.IR.001	NZ.IR.005	192	90	680	1088	0.00678733
NZ.IR.005	BL.IR.001	192	90	1088	680	0.00678733
NZ.IR.004	NZ.IR.008	304	145	1040	1028	0.00676983
NZ.IR.008	NZ.IR.004	304	145	1028	1040	0.00676983
BK.IR.018	BL.IR.015	34	13	145	1046	0.00671704
BL.IR.015	BK.IR.018	34	13	1046	145	0.00671704
SY.IR.2.001	WL.IR.022	327	156	1136	1100	0.00670841
WL.IR.022	SY.IR.2.001	327	156	1100	1136	0.00670841
WL.IR.003	WL.IR.012	342	164	1004	1088	0.00669216
WL.IR.012	WL.IR.003	342	164	1088	1004	0.00669216
BL.IR.032	NZ.IR.009	363	174	1085	1190	0.00659341
NZ.IR.009	BL.IR.032	363	174	1190	1085	0.00659341
WL.IR.012	WL.IR.025	370	178	1088	1041	0.00657586
WL.IR.025	WL.IR.012	370	178	1041	1088	0.00657586
NZ.LC.002	SY.LC.2.007	315	150	1146	1149	0.00653595
SY.LC.2.007	NZ.LC.002	315	150	1149	1146	0.00653595
BL.IR.018	EB.LC.003	306	146	1110	1041	0.0065086
EB.LC.003	BL.IR.018	306	146	1041	1110	0.0065086
BL.IR.012	NZ.IR.005	244	116	756	1088	0.00650759
NZ.IR.005	BL.IR.012	244	116	1088	756	0.00650759
BK.IR.009	NZ.LC.001	228	108	740	1132	0.00641026
NZ.LC.001	BK.IR.009	228	108	1132	740	0.00641026
BL.IR.018	BL.IR.031	335	161	1110	926	0.00638507
BL.IR.031	BL.IR.018	335	161	926	1110	0.00638507
BK.IR.015	EB.LC.003	301	144	996	1041	0.00638193
EB.LC.003	BK.IR.015	301	144	1041	996	0.00638193
WL.IR.020	WL.IR.022	368	177	1095	1100	0.00637813
WL.IR.022	WL.IR.020	368	177	1100	1095	0.00637813
BK.IR.009	SY.IR.2.002	236	112	740	1154	0.0063358
SY.IR.2.002	BK.IR.009	236	112	1154	740	0.0063358
NZ.IR.004	NZ.LC.M+1.010	340	163	1040	1176	0.00631769
NZ.LC.M+1.010	NZ.IR.004	340	163	1176	1040	0.00631769
BK.IR.015	EB.LC.001	158	74	996	593	0.00629327
EB.LC.001	BK.IR.015	158	74	593	996	0.00629327
BK.IR.009	NZ.LC.M+1.010	234	111	740	1176	0.00626305
NZ.LC.M+1.010	BK.IR.009	234	111	1176	740	0.00626305
BL.IR.001	NZ.IR.002	195	92	680	1090	0.00621469
NZ.IR.002	BL.IR.001	195	92	1090	680	0.00621469
NZ.IR.008	NZ.LC.M+1.011	351	169	1028	1075	0.00618165
NZ.LC.M+1.011	NZ.IR.008	351	169	1075	1028	0.00618165
NZ.LC.006	SY.LC.2.004	320	153	1130	1139	0.00617012
SY.LC.2.004	NZ.LC.006	320	153	1139	1130	0.00617012
BK.IR.009	SY.LC.1.001	221	105	740	1067	0.00608744
SY.LC.1.001	BK.IR.009	221	105	1067	740	0.00608744
WL.IR.018	WL.IR.024	337	162	1075	1064	0.00607761
WL.IR.024	WL.IR.018	337	162	1064	1075	0.00607761
SY.IR.2.003	SY.IR.2.005	362	174	1161	1145	0.00607112
SY.IR.2.005	SY.IR.2.003	362	174	1145	1161	0.00607112
BK.IR.009	BL.IR.003	217	103	740	1083	0.00603401
BL.IR.003	BK.IR.009	217	103	1083	740	0.00603401
SY.LC.1.015	SY.LC.2.003	277	132	1047	1108	0.00603248
SY.LC.2.003	SY.LC.1.015	277	132	1108	1047	0.00603248
NZ.LC.006	WL.IR.018	383	185	1130	1075	0.00589569
WL.IR.018	NZ.LC.006	383	185	1075	1130	0.00589569
BL.IR.001	NZ.IR.004	186	88	680	1040	0.00581395
NZ.IR.004	BL.IR.001	186	88	1040	680	0.00581395
BK.IR.006	NZ.LC.002	123	57	408	1146	0.00579151
NZ.LC.002	BK.IR.006	123	57	1146	408	0.00579151
NZ.LC.002	SY.IR.2.004	327	157	1146	1107	0.00577008
SY.IR.2.004	NZ.LC.002	327	157	1107	1146	0.00577008
NZ.LC.002	WL.IR.014	314	151	1146	942	0.00574713
WL.IR.014	NZ.LC.002	314	151	942	1146	0.00574713
NZ.IR.005	NZ.LC.M+1.010	385	186	1088	1176	0.00574205
NZ.LC.M+1.010	NZ.IR.005	385	186	1176	1088	0.00574205
BK.IR.014	NZ.LC.002	31	12	90	1146	0.00566343
NZ.LC.002	BK.IR.014	31	12	1146	90	0.00566343
NZ.LC.002	WL.IR.003	318	153	1146	1004	0.0055814
WL.IR.003	NZ.LC.002	318	153	1004	1146	0.0055814
NZ.IR.002	NZ.IR.005	362	175	1090	1088	0.00550964
NZ.IR.005	NZ.IR.002	362	175	1088	1090	0.00550964
BK.IR.003	NZ.LC.002	245	117	868	1146	0.00546177
NZ.LC.002	BK.IR.003	245	117	1146	868	0.00546177
BL.IR.012	WL.IR.018	240	115	756	1075	0.0054615
WL.IR.018	BL.IR.012	240	115	1075	756	0.0054615
EB.IR.008	EB.LC.002	333	161	960	1056	0.00545635
EB.LC.002	EB.IR.008	333	161	1056	960	0.00545635
EB.LC.008	SY.LC.2.004	283	136	879	1139	0.00545094
SY.LC.2.004	EB.LC.008	283	136	1139	879	0.00545094
BL.IR.033	SY.LC.2.001	306	147	1123	1107	0.00538117
SY.LC.2.001	BL.IR.033	306	147	1107	1123	0.00538117
BK.IR.009	SY.IR.2.005	258	124	740	1145	0.00530504
SY.IR.2.005	BK.IR.009	258	124	1145	740	0.00530504
BK.IR.010	NZ.LC.001	61	27	209	1132	0.00521999
NZ.LC.001	BK.IR.010	61	27	1132	209	0.00521999
EB.LC.003	WL.IR.018	323	156	1041	1075	0.00519849
WL.IR.018	EB.LC.003	323	156	1075	1041	0.00519849
BK.IR.014	BL.IR.001	18	7	90	680	0.00519481
BL.IR.001	BK.IR.014	18	7	680	90	0.00519481
BK.IR.013	BK.IR.019	111	52	954	399	0.00517369
BK.IR.019	BK.IR.013	111	52	399	954	0.00517369
BK.IR.009	WL.IR.016	179	85	740	1003	0.00516351
WL.IR.016	BK.IR.009	179	85	1003	740	0.00516351
BL.IR.015	NZ.IR.006	335	162	1046	1085	0.0051619
NZ.IR.006	BL.IR.015	335	162	1085	1046	0.0051619
SY.LC.1.015	SY.LC.2.001	289	139	1047	1107	0.00510678
SY.LC.2.001	SY.LC.1.015	289	139	1107	1047	0.00510678
BK.IR.014	NZ.IR.006	30	12	90	1085	0.00510638
NZ.IR.006	BK.IR.014	30	12	1085	90	0.00510638
BL.IR.018	EB.LC.010	317	153	1110	1047	0.00509968
EB.LC.010	BL.IR.018	317	153	1047	1110	0.00509968
BL.IR.015	BL.IR.023	347	168	1046	1114	0.00509259
BL.IR.023	BL.IR.015	347	168	1114	1046	0.00509259
BK.IR.018	EB.LC.010	48	21	145	1047	0.00503356
EB.LC.010	BK.IR.018	48	21	1047	145	0.00503356
BK.IR.012	SY.LC.2.001	154	73	485	1107	0.00502513
SY.LC.2.001	BK.IR.012	154	73	1107	485	0.00502513
SY.IR.2.005	WL.IR.024	351	170	1145	1064	0.00497963
WL.IR.024	SY.IR.2.005	351	170	1064	1145	0.00497963
BL.IR.016	WL.IR.021	302	146	992	1022	0.00496524
WL.IR.021	BL.IR.016	302	146	1022	992	0.00496524
BK.IR.001	BK.IR.009	173	83	672	740	0.00495751
BK.IR.009	BK.IR.001	173	83	740	672	0.00495751
BK.IR.012	NZ.LC.001	156	74	485	1132	0.00494743
NZ.LC.001	BK.IR.012	156	74	1132	485	0.00494743
NZ.IR.002	SY.IR.2.001	315	152	1090	1136	0.0049416
SY.IR.2.001	NZ.IR.002	315	152	1136	1090	0.0049416
BK.IR.009	NZ.IR.006	213	102	740	1085	0.00493151
NZ.IR.006	BK.IR.009	213	102	1085	740	0.00493151
BL.IR.030	SY.IR.2.005	341	165	1108	1145	0.00488238
SY.IR.2.005	BL.IR.030	341	165	1145	1108	0.00488238
BL.IR.012	SY.IR.2.004	225	108	756	1107	0.00483092
SY.IR.2.004	BL.IR.012	225	108	1107	756	0.00483092
NZ.IR.008	SY.LC.2.001	296	143	1028	1107	0.00468384
SY.LC.2.001	NZ.IR.008	296	143	1107	1028	0.00468384
BL.IR.009	SY.IR.2.005	318	154	998	1145	0.00466636
SY.IR.2.005	BL.IR.009	318	154	1145	998	0.00466636
WL.IR.022	WL.IR.024	344	167	1100	1064	0.00462107
WL.IR.024	WL.IR.022	344	167	1064	1100	0.00462107
BK.IR.014	BK.IR.015	35	15	90	996	0.00460405
BK.IR.015	BK.IR.014	35	15	996	90	0.00460405
NZ.LC.M+1.010	WL.IR.003	370	180	1176	1004	0.00458716
WL.IR.003	NZ.LC.M+1.010	370	180	1004	1176	0.00458716
EB.IR.008	EB.LC.001	159	76	960	593	0.00450741
EB.LC.001	EB.IR.008	159	76	593	960	0.00450741
BK.IR.012	BL.IR.030	149	71	485	1108	0.00439422
BL.IR.030	BK.IR.012	149	71	1108	485	0.00439422
BK.IR.009	BL.IR.014	232	112	740	1092	0.00436681
BL.IR.014	BK.IR.009	232	112	1092	740	0.00436681
BL.IR.012	BL.IR.018	226	109	756	1110	0.00428725
BL.IR.018	BL.IR.012	226	109	1110	756	0.00428725
EB.LC.002	WL.IR.012	341	166	1056	1088	0.00419776
WL.IR.012	EB.LC.002	341	166	1088	1056	0.00419776
BL.IR.015	NZ.LC.006	325	158	1046	1130	0.00413603
NZ.LC.006	BL.IR.015	325	158	1130	1046	0.00413603
BL.IR.015	NZ.LC.001	329	160	1046	1132	0.00413223
NZ.LC.001	BL.IR.015	329	160	1132	1046	0.00413223
NZ.LC.002	SY.LC.1.015	297	144	1146	1047	0.00410397
SY.LC.1.015	NZ.LC.002	297	144	1047	1146	0.00410397
BK.IR.014	SY.IR.2.001	27	11	90	1136	0.0040783
SY.IR.2.001	BK.IR.014	27	11	1136	90	0.0040783
BL.IR.001	EB.LC.010	201	97	680	1047	0.00405327
EB.LC.010	BL.IR.001	201	97	1047	680	0.00405327
BL.IR.001	EB.LC.002	225	109	680	1056	0.00403226
EB.LC.002	BL.IR.001	225	109	1056	680	0.00403226
BK.IR.019	BL.IR.034	98	47	399	609	0.00396825
BL.IR.034	BK.IR.019	98	47	609	399	0.00396825
NZ.LC.002	SY.LC.2.005	311	151	1146	1144	0.00393013
SY.LC.2.005	NZ.LC.002	311	151	1144	1146	0.00393013
WL.IR.001	WL.IR.020	344	168	967	1095	0.00387973
WL.IR.020	WL.IR.001	344	168	1095	967	0.00387973
BK.IR.010	BL.IR.003	63	29	209	1083	0.00386997
BL.IR.003	BK.IR.010	63	29	1083	209	0.00386997
WL.IR.003	WL.IR.024	320	156	1004	1064	0.00386847
WL.IR.024	WL.IR.003	320	156	1064	1004	0.00386847
BL.IR.012	EB.IR.006	241	117	756	1071	0.00383142
EB.IR.006	BL.IR.012	241	117	1071	756	0.00383142
BL.IR.012	WL.IR.012	231	112	756	1088	0.0037961
WL.IR.012	BL.IR.012	231	112	1088	756	0.0037961
NZ.IR.002	NZ.IR.008	314	153	1090	1028	0.00377715
NZ.IR.008	NZ.IR.002	314	153	1028	1090	0.00377715
EB.LC.002	WL.IR.024	338	165	1056	1064	0.00377358
WL.IR.024	EB.LC.002	338	165	1064	1056	0.00377358
EB.LC.001	WL.IR.003	168	81	593	1004	0.00375704
WL.IR.003	EB.LC.001	168	81	1004	593	0.00375704
BK.IR.008	BL.IR.001	162	78	922	680	0.00374532
BL.IR.001	BK.IR.008	162	78	680	922	0.00374532
NZ.IR.002	NZ.LC.M+1.011	354	173	1090	1075	0.00369515
NZ.LC.M+1.011	NZ.IR.002	354	173	1075	1090	0.00369515
BK.IR.018	BK.IR.019	26	12	145	399	0.00367647
BK.IR.019	BK.IR.018	26	12	399	145	0.00367647
NZ.LC.002	NZ.LC.M+1.009	312	152	1146	1034	0.00366972
NZ.LC.M+1.009	NZ.LC.002	312	152	1034	1146	0.00366972
EB.IR.003	EB.LC.001	188	91	1046	593	0.00366077
EB.LC.001	EB.IR.003	188	91	593	1046	0.00366077
SY.IR.2.004	SY.LC.2.002	340	166	1107	1098	0.00362812
SY.LC.2.002	SY.IR.2.004	340	166	1098	1107	0.00362812
EB.IR.002	NZ.LC.M+1.010	364	178	1070	1176	0.00356189
NZ.LC.M+1.010	EB.IR.002	364	178	1176	1070	0.00356189
NZ.IR.002	SY.IR.2.003	354	173	1090	1161	0.00355398
SY.IR.2.003	NZ.IR.002	354	173	1161	1090	0.00355398
BK.IR.008	WL.IR.024	287	140	922	1064	0.00352467
WL.IR.024	BK.IR.008	287	140	1064	922	0.00352467
BL.IR.034	WL.IR.020	178	86	609	1095	0.00352113
WL.IR.020	BL.IR.034	178	86	1095	609	0.00352113
EB.LC.001	SY.IR.2.002	178	86	593	1154	0.00343446
SY.IR.2.002	EB.LC.001	178	86	1154	593	0.00343446
EB.LC.003	WL.IR.021	321	157	1041	1022	0.00339312
WL.IR.021	EB.LC.003	321	157	1022	1041	0.00339312
EB.LC.002	EB.LC.003	309	151	1056	1041	0.0033381
EB.LC.003	EB.LC.002	309	151	1041	1056	0.0033381
BK.IR.018	WL.IR.024	40	18	145	1064	0.00330852
WL.IR.024	BK.IR.018	40	18	1064	145	0.00330852
NZ.LC.001	NZ.LC.M+1.007	323	158	1132	1016	0.00325885
NZ.LC.M+1.007	NZ.LC.001	323	158	1016	1132	0.00325885
BL.IR.032	WL.IR.024	353	173	1085	1064	0.00325733
WL.IR.024	BL.IR.032	353	173	1064	1085	0.00325733
BK.IR.018	NZ.IR.006	38	17	145	1085	0.00325203
NZ.IR.006	BK.IR.018	38	17	1085	145	0.00325203
BL.IR.018	EB.LC.002	359	176	1110	1056	0.00323176
EB.LC.002	BL.IR.018	359	176	1056	1110	0.00323176
BK.IR.010	NZ.IR.004	46	21	209	1040	0.00320256
NZ.IR.004	BK.IR.010	46	21	1040	209	0.00320256
BK.IR.010	WL.IR.025	62	29	209	1041	0.0032
WL.IR.025	BK.IR.010	62	29	1041	209	0.0032
NZ.IR.009	WL.IR.016	297	145	1190	1003	0.00319197
WL.IR.016	NZ.IR.009	297	145	1003	1190	0.00319197
EB.LC.003	SY.IR.2.002	323	158	1041	1154	0.00318907
SY.IR.2.002	EB.LC.003	323	158	1154	1041	0.00318907
SY.LC.1.001	SY.LC.2.005	339	166	1067	1144	0.00316599
SY.LC.2.005	SY.LC.1.001	339	166	1144	1067	0.00316599
BL.IR.014	BL.IR.033	343	168	1092	1123	0.00316027
BL.IR.033	BL.IR.014	343	168	1123	1092	0.00316027
BL.IR.014	NZ.LC.001	365	179	1092	1132	0.00314748
NZ.LC.001	BL.IR.014	365	179	1132	1092	0.00314748
BK.IR.010	WL.IR.024	54	25	209	1064	0.00314218
WL.IR.024	BK.IR.010	54	25	1064	209	0.00314218
NZ.IR.009	WL.IR.025	347	170	1190	1041	0.00313761
WL.IR.025	NZ.IR.009	347	170	1041	1190	0.00313761
NZ.LC.M+1.011	SY.IR.2.003	329	161	1075	1161	0.00313059
SY.IR.2.003	NZ.LC.M+1.011	329	161	1161	1075	0.00313059
BK.IR.018	SY.IR.2.001	46	21	145	1136	0.00312256
SY.IR.2.001	BK.IR.018	46	21	1136	145	0.00312256
BL.IR.023	SY.IR.2.001	325	159	1114	1136	0.00311111
SY.IR.2.001	BL.IR.023	325	159	1136	1114	0.00311111
SY.IR.2.005	SY.LC.2.003	327	160	1145	1108	0.00310697
SY.LC.2.003	SY.IR.2.005	327	160	1108	1145	0.00310697
BK.IR.012	NZ.LC.006	153	74	485	1130	0.00309598
NZ.LC.006	BK.IR.012	153	74	1130	485	0.00309598
SY.IR.2.002	SY.LC.2.005	323	158	1154	1144	0.00304613
SY.LC.2.005	SY.IR.2.002	323	158	1144	1154	0.00304613
BL.IR.001	WL.IR.003	215	105	680	1004	0.00296912
WL.IR.003	BL.IR.001	215	105	1004	680	0.00296912
EB.LC.001	SY.LC.2.007	165	80	593	1149	0.00287026
SY.LC.2.007	EB.LC.001	165	80	1149	593	0.00287026
NZ.IR.008	SY.LC.2.002	312	153	1028	1098	0.0028222
SY.LC.2.002	NZ.IR.008	312	153	1098	1028	0.0028222
EB.IR.003	NZ.LC.006	364	179	1046	1130	0.00275735
NZ.LC.006	EB.IR.003	364	179	1130	1046	0.00275735
BL.IR.015	SY.IR.2.005	340	167	1046	1145	0.00273848
SY.IR.2.005	BL.IR.015	340	167	1145	1046	0.00273848
NZ.LC.M+1.011	SY.LC.2.004	318	156	1075	1139	0.00271003
SY.LC.2.004	NZ.LC.M+1.011	318	156	1139	1075	0.00271003
BK.IR.009	BL.IR.030	221	108	740	1108	0.00270563
BL.IR.030	BK.IR.009	221	108	1108	740	0.00270563
NZ.LC.001	NZ.LC.006	376	185	1132	1130	0.00265252
NZ.LC.006	NZ.LC.001	376	185	1130	1132	0.00265252
BL.IR.023	NZ.LC.M+1.010	356	175	1114	1176	0.00262009
NZ.LC.M+1.010	BL.IR.023	356	175	1176	1114	0.00262009
BK.IR.018	WL.IR.005	45	21	145	1011	0.00259516
WL.IR.005	BK.IR.018	45	21	1011	145	0.00259516
BL.IR.012	NZ.LC.M+1.010	251	123	756	1176	0.00258799
NZ.LC.M+1.010	BL.IR.012	251	123	1176	756	0.00258799
BL.IR.012	NZ.IR.009	227	111	756	1190	0.00256937
NZ.IR.009	BL.IR.012	227	111	1190	756	0.00256937
NZ.IR.009	SY.IR.2.003	346	170	1190	1161	0.00255211
SY.IR.2.003	NZ.IR.009	346	170	1161	1190	0.00255211
BK.IR.012	NZ.IR.006	160	78	485	1085	0.00254777
NZ.IR.006	BK.IR.012	160	78	1085	485	0.00254777
BK.IR.010	WL.IR.017	59	28	209	972	0.00254022
WL.IR.017	BK.IR.010	59	28	972	209	0.00254022
BK.IR.008	BL.IR.003	287	141	922	1083	0.00249377
BL.IR.003	BK.IR.008	287	141	1083	922	0.00249377
BL.IR.030	EB.LC.010	309	152	1108	1047	0.00232019
EB.LC.010	BL.IR.030	309	152	1047	1108	0.00232019
BL.IR.014	WL.IR.018	359	177	1092	1075	0.00230734
WL.IR.018	BL.IR.014	359	177	1075	1092	0.00230734
BL.IR.023	EB.IR.002	343	169	1114	1070	0.00228938
EB.IR.002	BL.IR.023	343	169	1070	1114	0.00228938
BK.IR.009	WL.IR.011	236	116	740	1037	0.00225098
WL.IR.011	BK.IR.009	236	116	1037	740	0.00225098
BK.IR.018	NZ.IR.009	53	25	145	1190	0.00224719
NZ.IR.009	BK.IR.018	53	25	1190	145	0.00224719
NZ.IR.004	NZ.IR.009	315	155	1040	1190	0.00224215
NZ.IR.009	NZ.IR.004	315	155	1190	1040	0.00224215
BL.IR.030	NZ.LC.001	327	161	1108	1132	0.00223214
NZ.LC.001	BL.IR.030	327	161	1132	1108	0.00223214
BK.IR.001	BL.IR.033	220	108	672	1123	0.00222841
BL.IR.033	BK.IR.001	220	108	1123	672	0.00222841
BK.IR.005	BK.IR.006	107	52	969	408	0.00217865
BK.IR.006	BK.IR.005	107	52	408	969	0.00217865
BL.IR.001	SY.LC.2.006	206	101	680	1158	0.00217628
SY.LC.2.006	BL.IR.001	206	101	1158	680	0.00217628
BL.IR.012	NZ.LC.001	240	118	756	1132	0.00211864
NZ.LC.001	BL.IR.012	240	118	1132	756	0.00211864
BK.IR.006	BL.IR.033	143	70	408	1123	0.0019595
BL.IR.033	BK.IR.006	143	70	1123	408	0.0019595
EB.IR.003	NZ.IR.004	330	163	1046	1040	0.00191755
NZ.IR.004	EB.IR.003	330	163	1040	1046	0.00191755
EB.LC.001	NZ.IR.007	155	76	593	1003	0.0018797
NZ.IR.007	EB.LC.001	155	76	1003	593	0.0018797
SY.LC.1.015	SY.LC.2.007	326	161	1047	1149	0.00182149
SY.LC.2.007	SY.LC.1.015	326	161	1149	1047	0.00182149
BK.IR.007	WL.IR.020	356	176	1103	1095	0.00181984
WL.IR.020	BK.IR.007	356	176	1095	1103	0.00181984
BL.IR.014	NZ.LC.006	328	162	1092	1130	0.00180018
NZ.LC.006	BL.IR.014	328	162	1130	1092	0.00180018
BK.IR.018	NZ.LC.005	32	15	145	968	0.00179695
NZ.LC.005	BK.IR.018	32	15	968	145	0.00179695
BL.IR.015	NZ.IR.009	344	170	1046	1190	0.00178891
NZ.IR.009	BL.IR.015	344	170	1190	1046	0.00178891
BK.IR.018	EB.IR.005	48	23	145	977	0.00178253
BL.IR.001	WL.IR.016	197	97	680	1003	0.00178253
EB.IR.005	BK.IR.018	48	23	977	145	0.00178253
WL.IR.016	BL.IR.001	197	97	1003	680	0.00178253
BL.IR.001	EB.IR.006	215	106	680	1071	0.00171331
EB.IR.006	BL.IR.001	215	106	1071	680	0.00171331
BK.IR.018	BL.IR.030	50	24	145	1108	0.00159617
BL.IR.030	BK.IR.018	50	24	1108	145	0.00159617
BK.IR.018	NZ.LC.006	50	24	145	1130	0.00156863
NZ.LC.006	BK.IR.018	50	24	1130	145	0.00156863
BL.IR.001	BL.IR.034	116	57	680	609	0.00155159
BL.IR.034	BL.IR.001	116	57	609	680	0.00155159
SY.LC.1.015	WL.IR.020	317	157	1047	1095	0.00140056
WL.IR.020	SY.LC.1.015	317	157	1095	1047	0.00140056
NZ.LC.M+1.009	SY.IR.2.001	299	148	1034	1136	0.00138249
SY.IR.2.001	NZ.LC.M+1.009	299	148	1136	1034	0.00138249
BL.IR.023	NZ.IR.005	343	170	1114	1088	0.0013624
NZ.IR.005	BL.IR.023	343	170	1088	1114	0.0013624
BK.IR.012	BL.IR.015	150	74	485	1046	0.00130634
BL.IR.015	BK.IR.012	150	74	1046	485	0.00130634
BK.IR.020	WL.IR.021	312	155	1023	1022	0.000977995
WL.IR.021	BK.IR.020	312	155	1022	1023	0.000977995
BK.IR.015	BL.IR.014	328	163	996	1092	0.000957854
BL.IR.014	BK.IR.015	328	163	1092	996	0.000957854
EB.IR.001	SY.LC.1.015	312	155	1076	1047	0.000942063
SY.LC.1.015	EB.IR.001	312	155	1047	1076	0.000942063
EB.LC.010	NZ.IR.005	358	178	1047	1088	0.000936768
NZ.IR.005	EB.LC.010	358	178	1088	1047	0.000936768
NZ.IR.005	WL.IR.012	350	174	1088	1088	0.000919118
WL.IR.012	NZ.IR.005	350	174	1088	1088	0.000919118
BL.IR.018	EB.IR.002	346	172	1110	1070	0.000917431
EB.IR.002	BL.IR.018	346	172	1070	1110	0.000917431
SY.LC.1.015	SY.LC.2.005	302	150	1047	1144	0.000912825
SY.LC.2.005	SY.LC.1.015	302	150	1144	1047	0.000912825
BL.IR.003	BL.IR.018	334	166	1083	1110	0.000911993
BL.IR.018	BL.IR.003	334	166	1110	1083	0.000911993
NZ.LC.006	SY.LC.2.003	314	156	1130	1108	0.000893655
SY.LC.2.003	NZ.LC.006	314	156	1108	1130	0.000893655
BL.IR.023	SY.IR.2.005	334	166	1114	1145	0.000885347
SY.IR.2.005	BL.IR.023	334	166	1145	1114	0.000885347
BK.IR.010	WL.IR.012	53	26	209	1088	0.00077101
WL.IR.012	BK.IR.010	53	26	1088	209	0.00077101
BK.IR.012	WL.IR.024	139	69	485	1064	0.000645578
WL.IR.024	BK.IR.012	139	69	1064	485	0.000645578
BL.IR.034	EB.LC.004	167	83	609	954	0.000639795
EB.LC.004	BL.IR.034	167	83	954	609	0.000639795
BL.IR.001	WL.IR.001	203	101	680	967	0.000607165
WL.IR.001	BL.IR.001	203	101	967	680	0.000607165
EB.IR.002	EB.LC.001	189	94	1070	593	0.000601323
EB.LC.001	EB.IR.002	189	94	593	1070	0.000601323
BL.IR.001	EB.IR.003	193	96	680	1046	0.000579374
EB.IR.003	BL.IR.001	193	96	1046	680	0.000579374
BL.IR.012	EB.IR.002	227	113	756	1070	0.000547645
EB.IR.002	BL.IR.012	227	113	1070	756	0.000547645
BL.IR.015	EB.LC.004	273	136	1046	954	0.0005
EB.LC.004	BL.IR.015	273	136	954	1046	0.0005
WL.IR.024	WL.IR.025	353	176	1064	1041	0.000475059
WL.IR.025	WL.IR.024	353	176	1041	1064	0.000475059
EB.IR.005	NZ.LC.M+1.010	321	160	977	1176	0.000464468
NZ.LC.M+1.010	EB.IR.005	321	160	1176	977	0.000464468
SY.IR.2.001	WL.IR.011	327	163	1136	1037	0.000460193
WL.IR.011	SY.IR.2.001	327	163	1037	1136	0.000460193
SY.IR.2.001	SY.LC.1.015	297	148	1136	1047	0.000458085
SY.LC.1.015	SY.IR.2.001	297	148	1047	1136	0.000458085
BL.IR.014	BL.IR.018	317	158	1092	1110	0.000454133
BL.IR.018	BL.IR.014	317	158	1110	1092	0.000454133
SY.LC.1.011	SY.LC.2.004	325	162	1076	1139	0.000451467
SY.LC.2.004	SY.LC.1.011	325	162	1139	1076	0.000451467
NZ.LC.006	WL.IR.012	337	168	1130	1088	0.000450857
WL.IR.012	NZ.LC.006	337	168	1088	1130	0.000450857
BK.IR.009	EB.LC.010	242	121	740	1047	0
BK.IR.009	SY.LC.1.015	212	106	740	1047	0
BK.IR.010	BL.IR.009	60	30	209	998	0
BK.IR.010	NZ.LC.M+1.011	58	29	209	1075	0
BK.IR.010	WL.IR.015	58	29	209	981	0
BK.IR.010	WL.IR.020	68	34	209	1095	0
BK.IR.012	EB.IR.006	172	86	485	1071	0
BK.IR.018	WL.IR.003	46	23	145	1004	0
BL.IR.001	EB.IR.008	162	81	680	960	0
BL.IR.001	NZ.LC.M+1.009	184	92	680	1034	0
BL.IR.003	WL.IR.018	380	190	1083	1075	0
BL.IR.009	BK.IR.010	60	30	998	209	0
BL.IR.012	BL.IR.032	218	109	756	1085	0
BL.IR.014	BL.IR.015	342	171	1092	1046	0
BL.IR.015	BL.IR.014	342	171	1046	1092	0
BL.IR.015	WL.IR.022	348	174	1046	1100	0
BL.IR.018	NZ.IR.006	336	168	1110	1085	0
BL.IR.030	EB.LC.002	342	171	1108	1056	0
BL.IR.032	BL.IR.012	218	109	1085	756	0
EB.IR.006	BK.IR.012	172	86	1071	485	0
EB.IR.008	BL.IR.001	162	81	960	680	0
EB.LC.001	WL.IR.001	168	84	593	967	0
EB.LC.002	BL.IR.030	342	171	1056	1108	0
EB.LC.010	BK.IR.009	242	121	1047	740	0
EB.LC.010	SY.IR.2.005	346	173	1047	1145	0
NZ.IR.002	NZ.LC.006	348	174	1090	1130	0
NZ.IR.002	SY.LC.1.001	350	175	1090	1067	0
NZ.IR.006	BL.IR.018	336	168	1085	1110	0
NZ.IR.009	NZ.LC.M+1.007	352	176	1190	1016	0
NZ.IR.009	SY.LC.1.001	348	174	1190	1067	0
NZ.LC.006	NZ.IR.002	348	174	1130	1090	0
NZ.LC.M+1.007	NZ.IR.009	352	176	1016	1190	0
NZ.LC.M+1.009	BL.IR.001	184	92	1034	680	0
NZ.LC.M+1.011	BK.IR.010	58	29	1075	209	0
SY.IR.2.005	EB.LC.010	346	173	1145	1047	0
SY.LC.1.001	NZ.IR.002	350	175	1067	1090	0
SY.LC.1.001	NZ.IR.009	348	174	1067	1190	0
SY.LC.1.015	BK.IR.009	212	106	1047	740	0
WL.IR.001	EB.LC.001	168	84	967	593	0
WL.IR.003	BK.IR.018	46	23	1004	145	0
WL.IR.015	BK.IR.010	58	29	981	209	0
WL.IR.018	BL.IR.003	380	190	1075	1083	0
WL.IR.020	BK.IR.010	68	34	1095	209	0
WL.IR.022	BL.IR.015	348	174	1100	1046	0
BL.IR.033	NZ.LC.001	343	172	1123	1132	-0.000443459
NZ.LC.001	BL.IR.033	343	172	1132	1123	-0.000443459
BL.IR.032	SY.IR.2.005	379	190	1085	1145	-0.00044843
SY.IR.2.005	BL.IR.032	379	190	1145	1085	-0.00044843
BK.IR.007	BL.IR.014	349	175	1103	1092	-0.000455581
BL.IR.014	BK.IR.007	349	175	1092	1103	-0.000455581
EB.LC.010	NZ.LC.001	383	192	1047	1132	-0.000458926
NZ.LC.001	EB.LC.010	383	192	1132	1047	-0.000458926
BK.IR.007	WL.IR.003	345	173	1103	1004	-0.000474608
WL.IR.003	BK.IR.007	345	173	1004	1103	-0.000474608
BL.IR.016	EB.LC.003	281	141	992	1041	-0.000491884
EB.LC.003	BL.IR.016	281	141	1041	992	-0.000491884
BK.IR.009	BL.IR.032	239	120	740	1085	-0.000547945
BL.IR.032	BK.IR.009	239	120	1085	740	-0.000547945
BK.IR.009	WL.IR.003	235	118	740	1004	-0.000573394
WL.IR.003	BK.IR.009	235	118	1004	740	-0.000573394
EB.LC.001	WL.IR.017	161	81	593	972	-0.000638978
WL.IR.017	EB.LC.001	161	81	972	593	-0.000638978
BK.IR.010	SY.LC.1.011	59	30	209	1076	-0.00077821
SY.LC.1.011	BK.IR.010	59	30	1076	209	-0.00077821
BK.IR.018	EB.LC.003	55	28	145	1041	-0.00084317
EB.LC.003	BK.IR.018	55	28	1041	145	-0.00084317
BK.IR.010	EB.IR.008	57	29	209	960	-0.000855432
EB.IR.008	BK.IR.010	57	29	960	209	-0.000855432
SY.IR.2.005	SY.LC.2.007	336	169	1145	1149	-0.00087184
SY.LC.2.007	SY.IR.2.005	336	169	1149	1145	-0.00087184
NZ.IR.006	SY.IR.2.002	334	168	1085	1154	-0.000893256
SY.IR.2.002	NZ.IR.006	334	168	1154	1085	-0.000893256
NZ.LC.002	SY.LC.1.001	316	159	1146	1067	-0.000903751
SY.LC.1.001	NZ.LC.002	316	159	1067	1146	-0.000903751
BL.IR.003	BL.IR.033	352	177	1083	1123	-0.000906618
BL.IR.033	BL.IR.003	352	177	1123	1083	-0.000906618
BL.IR.018	BL.IR.032	356	179	1110	1085	-0.000911162
BL.IR.032	BL.IR.018	356	179	1085	1110	-0.000911162
BK.IR.007	WL.IR.024	334	168	1103	1064	-0.000922935
WL.IR.024	BK.IR.007	334	168	1064	1103	-0.000922935
BL.IR.023	EB.LC.003	308	155	1114	1041	-0.000928074
EB.LC.003	BL.IR.023	308	155	1041	1114	-0.000928074
EB.LC.002	WL.IR.020	356	179	1056	1095	-0.0009298
WL.IR.020	EB.LC.002	356	179	1095	1056	-0.0009298
BK.IR.005	BK.IR.014	31	16	969	90	-0.000944287
BK.IR.014	BK.IR.005	31	16	90	969	-0.000944287
EB.IR.008	NZ.LC.002	286	144	960	1146	-0.000949668
NZ.LC.002	EB.IR.008	286	144	1146	960	-0.000949668
EB.LC.001	NZ.IR.005	190	96	593	1088	-0.00118977
NZ.IR.005	EB.LC.001	190	96	1088	593	-0.00118977
BK.IR.012	SY.LC.2.007	144	73	485	1149	-0.00122399
SY.LC.2.007	BK.IR.012	144	73	1149	485	-0.00122399
BK.IR.012	NZ.IR.005	170	86	485	1088	-0.00127146
NZ.IR.005	BK.IR.012	170	86	1088	485	-0.00127146
NZ.IR.009	SY.LC.2.006	373	188	1190	1158	-0.00127768
SY.LC.2.006	NZ.IR.009	373	188	1158	1190	-0.00127768
BK.IR.012	NZ.LC.M+1.011	132	67	485	1075	-0.00128205
NZ.LC.M+1.011	BK.IR.012	132	67	1075	485	-0.00128205
BK.IR.019	BL.IR.033	116	59	399	1123	-0.00131406
BL.IR.033	BK.IR.019	116	59	1123	399	-0.00131406
NZ.LC.006	SY.LC.2.007	329	166	1130	1149	-0.00131637
SY.LC.2.007	NZ.LC.006	329	166	1149	1130	-0.00131637
BL.IR.033	SY.IR.2.002	343	173	1123	1154	-0.00131752
SY.IR.2.002	BL.IR.033	343	173	1154	1123	-0.00131752
NZ.LC.001	WL.IR.022	375	189	1132	1100	-0.00134409
WL.IR.022	NZ.LC.001	375	189	1100	1132	-0.00134409
NZ.IR.005	NZ.LC.001	385	194	1088	1132	-0.00135135
NZ.LC.001	NZ.IR.005	385	194	1132	1088	-0.00135135
EB.LC.002	NZ.LC.002	311	157	1056	1146	-0.0013624
NZ.LC.002	EB.LC.002	311	157	1146	1056	-0.0013624
BK.IR.010	NZ.LC.006	68	35	209	1130	-0.00149365
NZ.LC.006	BK.IR.010	68	35	1130	209	-0.00149365
BL.IR.012	BL.IR.014	225	114	756	1092	-0.00162338
BL.IR.014	BL.IR.012	225	114	1092	756	-0.00162338
BK.IR.009	WL.IR.018	227	115	740	1075	-0.00165289
WL.IR.018	BK.IR.009	227	115	1075	740	-0.00165289
BL.IR.012	WL.IR.011	247	125	756	1037	-0.00167317
WL.IR.011	BL.IR.012	247	125	1037	756	-0.00167317
BL.IR.034	NZ.LC.002	187	95	609	1146	-0.0017094
NZ.LC.002	BL.IR.034	187	95	1146	609	-0.0017094
BK.IR.018	WL.IR.016	40	21	145	1003	-0.00174216
WL.IR.016	BK.IR.018	40	21	1003	145	-0.00174216
EB.LC.001	SY.IR.2.004	167	85	593	1107	-0.00176471
SY.IR.2.004	EB.LC.001	167	85	1107	593	-0.00176471
BK.IR.009	EB.LC.004	181	92	740	954	-0.00177096
EB.LC.004	BK.IR.009	181	92	954	740	-0.00177096
NZ.IR.005	WL.IR.020	368	186	1088	1095	-0.00183234
WL.IR.020	NZ.IR.005	368	186	1095	1088	-0.00183234
BK.IR.018	WL.IR.014	50	26	145	942	-0.00183993
WL.IR.014	BK.IR.018	50	26	942	145	-0.00183993
NZ.LC.M+1.009	SY.LC.2.004	296	150	1034	1139	-0.00184077
SY.LC.2.004	NZ.LC.M+1.009	296	150	1139	1034	-0.00184077
BL.IR.023	EB.LC.002	324	164	1114	1056	-0.00184332
EB.LC.002	BL.IR.023	324	164	1056	1114	-0.00184332
SY.IR.2.001	WL.IR.003	324	164	1136	1004	-0.00186916
WL.IR.003	SY.IR.2.001	324	164	1004	1136	-0.00186916
BL.IR.014	WL.IR.011	346	175	1092	1037	-0.00187882
WL.IR.011	BL.IR.014	346	175	1037	1092	-0.00187882
BK.IR.019	NZ.IR.009	125	64	399	1190	-0.00188798
NZ.IR.009	BK.IR.019	125	64	1190	399	-0.00188798
EB.LC.010	WL.IR.024	320	162	1047	1064	-0.00189484
WL.IR.024	EB.LC.010	320	162	1064	1047	-0.00189484
BK.IR.003	SY.LC.2.001	250	127	868	1107	-0.00202532
SY.LC.2.001	BK.IR.003	250	127	1107	868	-0.00202532
EB.IR.005	EB.IR.008	260	132	977	960	-0.00206505
EB.IR.008	EB.IR.005	260	132	960	977	-0.00206505
BK.IR.001	NZ.LC.002	226	115	672	1146	-0.00220022
NZ.LC.002	BK.IR.001	226	115	1146	672	-0.00220022
BL.IR.014	NZ.LC.M+1.010	347	176	1092	1176	-0.00220459
NZ.LC.M+1.010	BL.IR.014	347	176	1176	1092	-0.00220459
NZ.LC.002	SY.LC.2.003	287	146	1146	1108	-0.00221828
SY.LC.2.003	NZ.LC.002	287	146	1108	1146	-0.00221828
BK.IR.007	SY.LC.2.001	293	149	1103	1107	-0.00226244
SY.LC.2.001	BK.IR.007	293	149	1107	1103	-0.00226244
BK.IR.018	SY.IR.2.002	45	24	145	1154	-0.00230947
SY.IR.2.002	BK.IR.018	45	24	1154	145	-0.00230947
EB.LC.002	NZ.IR.006	337	171	1056	1085	-0.00233536
NZ.IR.006	EB.LC.002	337	171	1085	1056	-0.00233536
BL.IR.003	BL.IR.015	323	164	1083	1046	-0.00234852
BL.IR.015	BL.IR.003	323	164	1046	1083	-0.00234852
BK.IR.007	BK.IR.015	329	167	1103	996	-0.00238209
BK.IR.015	BK.IR.007	329	167	996	1103	-0.00238209
BK.IR.015	NZ.IR.006	311	158	996	1085	-0.00240269
NZ.IR.006	BK.IR.015	311	158	1085	996	-0.00240269
BK.IR.007	BK.IR.018	47	25	1103	145	-0.00240385
BK.IR.018	BK.IR.007	47	25	145	1103	-0.00240385
BK.IR.012	SY.IR.2.002	146	75	485	1154	-0.00244051
SY.IR.2.002	BK.IR.012	146	75	1154	485	-0.00244051
BK.IR.014	SY.LC.2.004	25	14	90	1139	-0.00244101
SY.LC.2.004	BK.IR.014	25	14	1139	90	-0.00244101
BK.IR.020	WL.IR.016	295	150	1023	1003	-0.00246792
WL.IR.016	BK.IR.020	295	150	1003	1023	-0.00246792
BK.IR.003	SY.LC.2.004	243	124	868	1139	-0.00249128
SY.LC.2.004	BK.IR.003	243	124	1139	868	-0.00249128
EB.LC.003	EB.LC.006	293	149	1041	943	-0.00252016
EB.LC.006	EB.LC.003	293	149	943	1041	-0.00252016
EB.LC.010	NZ.IR.009	348	177	1047	1190	-0.00268216
NZ.IR.009	EB.LC.010	348	177	1190	1047	-0.00268216
BK.IR.018	EB.LC.004	41	22	145	954	-0.00272975
EB.LC.004	BK.IR.018	41	22	954	145	-0.00272975
BL.IR.001	SY.LC.2.007	195	100	680	1149	-0.00273373
SY.LC.2.007	BL.IR.001	195	100	1149	680	-0.00273373
BK.IR.012	BL.IR.034	103	53	485	609	-0.00274223
BL.IR.034	BK.IR.012	103	53	609	485	-0.00274223
BL.IR.018	EB.IR.006	344	175	1110	1071	-0.00275103
EB.IR.006	BL.IR.018	344	175	1071	1110	-0.00275103
BK.IR.012	NZ.LC.005	126	65	485	968	-0.00275292
NZ.LC.005	BK.IR.012	126	65	968	485	-0.00275292
BK.IR.009	EB.IR.002	221	113	740	1070	-0.00276243
BL.IR.001	NZ.LC.006	221	113	680	1130	-0.00276243
EB.IR.002	BK.IR.009	221	113	1070	740	-0.00276243
NZ.LC.006	BL.IR.001	221	113	1130	680	-0.00276243
BL.IR.015	WL.IR.020	314	160	1046	1095	-0.00280243
WL.IR.020	BL.IR.015	314	160	1095	1046	-0.00280243
BL.IR.015	WL.IR.012	342	174	1046	1088	-0.00281162
WL.IR.012	BL.IR.015	342	174	1088	1046	-0.00281162
BK.IR.001	BK.IR.007	253	129	672	1103	-0.0028169
BK.IR.007	BK.IR.001	253	129	1103	672	-0.0028169
WL.IR.011	WL.IR.012	354	180	1037	1088	-0.00282353
WL.IR.012	WL.IR.011	354	180	1088	1037	-0.00282353
WL.IR.016	WL.IR.020	308	157	1003	1095	-0.00285987
WL.IR.020	WL.IR.016	308	157	1095	1003	-0.00285987
BL.IR.034	SY.IR.2.001	179	92	609	1136	-0.00286533
SY.IR.2.001	BL.IR.034	179	92	1136	609	-0.00286533
EB.IR.003	SY.LC.1.015	298	152	1046	1047	-0.0028667
SY.LC.1.015	EB.IR.003	298	152	1047	1046	-0.0028667
BL.IR.001	WL.IR.024	179	92	680	1064	-0.00286697
WL.IR.024	BL.IR.001	179	92	1064	680	-0.00286697
BK.IR.005	BK.IR.019	112	58	969	399	-0.00292398
BK.IR.019	BK.IR.005	112	58	399	969	-0.00292398
BK.IR.018	EB.LC.008	33	18	145	879	-0.00292969
EB.LC.008	BK.IR.018	33	18	879	145	-0.00292969
EB.LC.003	WL.IR.003	304	155	1041	1004	-0.00293399
WL.IR.003	EB.LC.003	304	155	1004	1041	-0.00293399
BL.IR.030	EB.LC.001	181	93	1108	593	-0.00293945
EB.LC.001	BL.IR.030	181	93	593	1108	-0.00293945
BK.IR.010	SY.LC.2.001	54	29	209	1107	-0.00303951
SY.LC.2.001	BK.IR.010	54	29	1107	209	-0.00303951
BK.IR.007	BK.IR.010	64	34	1103	209	-0.00304878
BK.IR.010	BK.IR.007	64	34	209	1103	-0.00304878
BK.IR.018	NZ.LC.001	42	23	145	1132	-0.00313234
NZ.LC.001	BK.IR.018	42	23	1132	145	-0.00313234
EB.IR.006	NZ.LC.002	341	174	1071	1146	-0.00315742
NZ.LC.002	EB.IR.006	341	174	1146	1071	-0.00315742
BK.IR.012	WL.IR.020	149	77	485	1095	-0.00316456
WL.IR.020	BK.IR.012	149	77	1095	485	-0.00316456
EB.IR.002	NZ.LC.001	351	179	1070	1132	-0.00317893
NZ.LC.001	EB.IR.002	351	179	1132	1070	-0.00317893
NZ.IR.002	SY.LC.2.003	303	155	1090	1108	-0.00318471
SY.LC.2.003	NZ.IR.002	303	155	1108	1090	-0.00318471
BK.IR.014	SY.IR.2.002	32	18	90	1154	-0.00321543
SY.IR.2.002	BK.IR.014	32	18	1154	90	-0.00321543
NZ.IR.005	WL.IR.018	365	186	1088	1075	-0.00323625
WL.IR.018	NZ.IR.005	365	186	1075	1088	-0.00323625
BL.IR.033	WL.IR.011	357	182	1123	1037	-0.00324074
WL.IR.011	BL.IR.033	357	182	1037	1123	-0.00324074
BL.IR.015	SY.LC.2.001	279	143	1046	1107	-0.00325128
SY.LC.2.001	BL.IR.015	279	143	1107	1046	-0.00325128
EB.LC.003	WL.IR.022	365	186	1041	1100	-0.0032695
WL.IR.022	EB.LC.003	365	186	1100	1041	-0.0032695
BK.IR.009	NZ.IR.005	226	116	740	1088	-0.00328228
NZ.IR.005	BK.IR.009	226	116	1088	740	-0.00328228
SY.LC.1.001	SY.LC.1.015	313	160	1067	1047	-0.00331126
SY.LC.1.015	SY.LC.1.001	313	160	1047	1067	-0.00331126
WL.IR.015	WL.IR.020	321	164	981	1095	-0.00337187
WL.IR.020	WL.IR.015	321	164	1095	981	-0.00337187
EB.IR.005	NZ.IR.005	307	157	977	1088	-0.00338983
NZ.IR.005	EB.IR.005	307	157	1088	977	-0.00338983
BK.IR.014	BL.IR.032	26	15	90	1085	-0.00340426
BL.IR.032	BK.IR.014	26	15	1085	90	-0.00340426
BL.IR.033	BL.IR.034	168	87	1123	609	-0.0034642
BL.IR.034	BL.IR.033	168	87	609	1123	-0.0034642
BK.IR.012	BK.IR.014	18	10	485	90	-0.00347826
BK.IR.014	BK.IR.012	18	10	90	485	-0.00347826
BK.IR.018	WL.IR.001	48	26	145	967	-0.00359712
WL.IR.001	BK.IR.018	48	26	967	145	-0.00359712
BK.IR.009	BK.IR.014	27	15	740	90	-0.00361446
BK.IR.014	BK.IR.009	27	15	90	740	-0.00361446
EB.IR.003	SY.LC.2.004	294	151	1046	1139	-0.00366133
SY.LC.2.004	EB.IR.003	294	151	1139	1046	-0.00366133
NZ.IR.006	WL.IR.020	334	171	1085	1095	-0.00366972
WL.IR.020	NZ.IR.006	334	171	1095	1085	-0.00366972
BK.IR.006	BL.IR.001	104	54	408	680	-0.00367647
BL.IR.001	BK.IR.006	104	54	680	408	-0.00367647
NZ.IR.008	NZ.LC.001	332	170	1028	1132	-0.0037037
NZ.LC.001	NZ.IR.008	332	170	1132	1028	-0.0037037
EB.LC.002	WL.IR.022	348	178	1056	1100	-0.00371058
WL.IR.022	EB.LC.002	348	178	1100	1056	-0.00371058
BL.IR.014	EB.LC.002	382	195	1092	1056	-0.00372439
EB.LC.002	BL.IR.014	382	195	1056	1092	-0.00372439
EB.IR.007	NZ.LC.002	300	154	988	1146	-0.00374883
NZ.LC.002	EB.IR.007	300	154	1146	988	-0.00374883
BL.IR.012	NZ.IR.006	237	122	756	1085	-0.00380228
NZ.IR.006	BL.IR.012	237	122	1085	756	-0.00380228
WL.IR.011	WL.IR.024	330	169	1037	1064	-0.00380771
WL.IR.024	WL.IR.011	330	169	1064	1037	-0.00380771
BK.IR.008	BL.IR.033	282	145	922	1123	-0.00391198
BL.IR.033	BK.IR.008	282	145	1123	922	-0.00391198
BK.IR.009	BL.IR.015	203	105	740	1046	-0.00391937
BL.IR.015	BK.IR.009	203	105	1046	740	-0.00391937
NZ.LC.006	SY.IR.2.003	335	172	1130	1161	-0.00392842
SY.IR.2.003	NZ.LC.006	335	172	1161	1130	-0.00392842
BL.IR.030	SY.IR.2.002	317	163	1108	1154	-0.00397878
SY.IR.2.002	BL.IR.030	317	163	1154	1108	-0.00397878
NZ.LC.M+1.010	NZ.LC.M+1.011	325	167	1176	1075	-0.00399822
NZ.LC.M+1.011	NZ.LC.M+1.010	325	167	1075	1176	-0.00399822
EB.LC.001	SY.LC.2.004	163	85	593	1139	-0.00404157
SY.LC.2.004	EB.LC.001	163	85	1139	593	-0.00404157
NZ.LC.006	WL.IR.024	341	175	1130	1064	-0.0041021
WL.IR.024	NZ.LC.006	341	175	1064	1130	-0.0041021
BL.IR.030	BL.IR.032	325	167	1108	1085	-0.00410397
BL.IR.032	BL.IR.030	325	167	1085	1108	-0.00410397
EB.LC.002	NZ.LC.006	351	180	1056	1130	-0.00411711
NZ.LC.006	EB.LC.002	351	180	1130	1056	-0.00411711
BL.IR.003	NZ.IR.005	357	183	1083	1088	-0.00414556
NZ.IR.005	BL.IR.003	357	183	1088	1083	-0.00414556
EB.IR.005	NZ.IR.009	317	163	977	1190	-0.00415321
NZ.IR.009	EB.IR.005	317	163	1190	977	-0.00415321
EB.IR.003	SY.IR.2.004	325	167	1046	1107	-0.00418021
SY.IR.2.004	EB.IR.003	325	167	1107	1046	-0.00418021
BK.IR.015	SY.IR.2.005	357	183	996	1145	-0.00420364
SY.IR.2.005	BK.IR.015	357	183	1145	996	-0.00420364
WL.IR.018	WL.IR.025	353	181	1075	1041	-0.00425331
WL.IR.025	WL.IR.018	353	181	1041	1075	-0.00425331
SY.LC.2.004	WL.IR.002	295	152	1139	951	-0.00430622
WL.IR.002	SY.LC.2.004	295	152	951	1139	-0.00430622
BK.IR.014	WL.IR.024	23	14	90	1064	-0.00433276
WL.IR.024	BK.IR.014	23	14	1064	90	-0.00433276
BK.IR.008	SY.IR.2.005	301	155	922	1145	-0.00435414
SY.IR.2.005	BK.IR.008	301	155	1145	922	-0.00435414
BL.IR.018	NZ.LC.M+1.010	366	188	1110	1176	-0.00437445
NZ.LC.M+1.010	BL.IR.018	366	188	1176	1110	-0.00437445
SY.IR.2.002	WL.IR.020	362	186	1154	1095	-0.00444642
WL.IR.020	SY.IR.2.002	362	186	1095	1154	-0.00444642
EB.LC.008	SY.IR.2.001	275	142	879	1136	-0.0044665
SY.IR.2.001	EB.LC.008	275	142	1136	879	-0.0044665
NZ.IR.009	SY.LC.1.015	326	168	1190	1047	-0.00447027
SY.LC.1.015	NZ.IR.009	326	168	1047	1190	-0.00447027
NZ.LC.006	WL.IR.020	342	176	1130	1095	-0.00449438
WL.IR.020	NZ.LC.006	342	176	1095	1130	-0.00449438
NZ.LC.M+1.010	SY.LC.1.015	334	172	1176	1047	-0.00449843
SY.LC.1.015	NZ.LC.M+1.010	334	172	1047	1176	-0.00449843
BL.IR.012	WL.IR.016	192	100	756	1003	-0.00454804
WL.IR.016	BL.IR.012	192	100	1003	756	-0.00454804
BK.IR.010	BL.IR.018	58	32	209	1110	-0.0045489
BL.IR.018	BK.IR.010	58	32	1110	209	-0.0045489
BL.IR.033	EB.IR.006	364	187	1123	1071	-0.00455789
EB.IR.006	BL.IR.033	364	187	1071	1123	-0.00455789
EB.LC.002	SY.IR.2.001	312	161	1056	1136	-0.00456204
SY.IR.2.001	EB.LC.002	312	161	1136	1056	-0.00456204
BK.IR.010	BL.IR.014	68	37	209	1092	-0.00461184
BL.IR.014	BK.IR.010	68	37	1092	209	-0.00461184
BK.IR.009	EB.IR.005	212	110	740	977	-0.00465929
EB.IR.005	BK.IR.009	212	110	977	740	-0.00465929
NZ.IR.009	SY.LC.2.004	317	164	1190	1139	-0.00472306
SY.LC.2.004	NZ.IR.009	317	164	1139	1190	-0.00472306
WL.IR.012	WL.IR.021	312	161	1088	1022	-0.00473934
WL.IR.021	WL.IR.012	312	161	1022	1088	-0.00473934
NZ.LC.002	SY.LC.2.006	309	160	1146	1158	-0.00477431
SY.LC.2.006	NZ.LC.002	309	160	1158	1146	-0.00477431
BL.IR.001	EB.IR.005	184	96	680	977	-0.004828
EB.IR.005	BL.IR.001	184	96	977	680	-0.004828
BK.IR.018	BL.IR.014	42	24	145	1092	-0.00485044
BL.IR.014	BK.IR.018	42	24	1092	145	-0.00485044
BL.IR.018	SY.IR.2.002	303	157	1110	1154	-0.00485866
SY.IR.2.002	BL.IR.018	303	157	1154	1110	-0.00485866
BK.IR.012	WL.IR.002	127	67	485	951	-0.00487465
WL.IR.002	BK.IR.012	127	67	951	485	-0.00487465
BK.IR.015	WL.IR.011	334	172	996	1037	-0.00491884
WL.IR.011	BK.IR.015	334	172	1037	996	-0.00491884
BK.IR.010	BK.IR.015	50	28	209	996	-0.00497925
BK.IR.015	BK.IR.010	50	28	996	209	-0.00497925
BK.IR.009	EB.LC.002	221	115	740	1056	-0.00501114
EB.LC.002	BK.IR.009	221	115	1056	740	-0.00501114
BK.IR.007	BL.IR.032	359	185	1103	1085	-0.00502742
BL.IR.032	BK.IR.007	359	185	1085	1103	-0.00502742
BK.IR.007	BK.IR.014	36	21	1103	90	-0.00502934
BK.IR.014	BK.IR.007	36	21	90	1103	-0.00502934
SY.LC.1.001	SY.LC.2.003	341	176	1067	1108	-0.00505747
SY.LC.2.003	SY.LC.1.001	341	176	1108	1067	-0.00505747
BK.IR.010	EB.IR.005	54	30	209	977	-0.00505902
EB.IR.005	BK.IR.010	54	30	977	209	-0.00505902
WL.IR.018	WL.IR.020	353	182	1075	1095	-0.00506912
WL.IR.020	WL.IR.018	353	182	1095	1075	-0.00506912
EB.LC.001	NZ.LC.005	134	71	593	968	-0.00512492
NZ.LC.005	EB.LC.001	134	71	968	593	-0.00512492
BL.IR.001	SY.LC.1.011	189	99	680	1076	-0.00512528
SY.LC.1.011	BL.IR.001	189	99	1076	680	-0.00512528
WL.IR.020	WL.IR.025	343	177	1095	1041	-0.00514981
WL.IR.025	WL.IR.020	343	177	1041	1095	-0.00514981
BK.IR.010	EB.LC.004	56	31	209	954	-0.00515907
EB.LC.004	BK.IR.010	56	31	954	209	-0.00515907
NZ.IR.002	NZ.LC.M+1.009	325	168	1090	1034	-0.00517891
NZ.LC.M+1.009	NZ.IR.002	325	168	1034	1090	-0.00517891
NZ.IR.004	NZ.LC.M+1.011	325	168	1040	1075	-0.00520095
NZ.LC.M+1.011	NZ.IR.004	325	168	1075	1040	-0.00520095
WL.IR.003	WL.IR.022	351	181	1004	1100	-0.00522814
WL.IR.022	WL.IR.003	351	181	1100	1004	-0.00522814
SY.IR.2.005	SY.LC.2.005	366	189	1145	1144	-0.00524246
SY.LC.2.005	SY.IR.2.005	366	189	1144	1145	-0.00524246
BL.IR.011	BL.IR.031	302	156	967	926	-0.00528262
BL.IR.031	BL.IR.011	302	156	926	967	-0.00528262
BK.IR.010	BL.IR.023	57	32	209	1114	-0.00529101
BL.IR.023	BK.IR.010	57	32	1114	209	-0.00529101
BK.IR.019	WL.IR.020	110	59	399	1095	-0.00535475
WL.IR.020	BK.IR.019	110	59	1095	399	-0.00535475
EB.LC.008	SY.IR.2.003	301	156	879	1161	-0.00539216
SY.IR.2.003	EB.LC.008	301	156	1161	879	-0.00539216
BK.IR.010	NZ.IR.005	63	35	209	1088	-0.00539707
NZ.IR.005	BK.IR.010	63	35	1088	209	-0.00539707
SY.IR.2.002	SY.LC.1.001	336	174	1154	1067	-0.00540297
SY.LC.1.001	SY.IR.2.002	336	174	1067	1154	-0.00540297
BK.IR.018	EB.IR.008	38	22	145	960	-0.00542986
BL.IR.018	WL.IR.022	338	175	1110	1100	-0.00542986
EB.IR.008	BK.IR.018	38	22	960	145	-0.00542986
WL.IR.022	BL.IR.018	338	175	1100	1110	-0.00542986
BL.IR.018	NZ.IR.005	360	186	1110	1088	-0.00545951
NZ.IR.005	BL.IR.018	360	186	1088	1110	-0.00545951
BL.IR.032	WL.IR.022	372	192	1085	1100	-0.00549199
WL.IR.022	BL.IR.032	372	192	1100	1085	-0.00549199
BK.IR.015	NZ.IR.007	287	149	996	1003	-0.00550275
NZ.IR.007	BK.IR.015	287	149	1003	996	-0.00550275
EB.IR.001	WL.IR.012	328	170	1076	1088	-0.00554529
WL.IR.012	EB.IR.001	328	170	1088	1076	-0.00554529
NZ.LC.M+1.010	SY.IR.2.003	329	171	1176	1161	-0.00556269
SY.IR.2.003	NZ.LC.M+1.010	329	171	1161	1176	-0.00556269
BK.IR.010	SY.LC.1.015	55	31	209	1047	-0.00557325
SY.LC.1.015	BK.IR.010	55	31	1047	209	-0.00557325
EB.IR.003	SY.LC.2.001	296	154	1046	1107	-0.00557362
SY.LC.2.001	EB.IR.003	296	154	1107	1046	-0.00557362
NZ.IR.004	SY.LC.2.001	296	154	1040	1107	-0.00558919
SY.LC.2.001	NZ.IR.004	296	154	1107	1040	-0.00558919
EB.LC.001	NZ.LC.M+1.007	149	79	593	1016	-0.00559354
NZ.LC.M+1.007	EB.LC.001	149	79	1016	593	-0.00559354
BK.IR.018	BL.IR.031	34	20	145	926	-0.00560224
BL.IR.031	BK.IR.018	34	20	926	145	-0.00560224
BK.IR.010	WL.IR.011	53	30	209	1037	-0.00561798
WL.IR.011	BK.IR.010	53	30	1037	209	-0.00561798
EB.LC.010	WL.IR.018	350	181	1047	1075	-0.00565504
WL.IR.018	EB.LC.010	350	181	1075	1047	-0.00565504
NZ.IR.009	SY.IR.2.004	351	182	1190	1107	-0.00565956
SY.IR.2.004	NZ.IR.009	351	182	1107	1190	-0.00565956
BK.IR.007	BK.IR.012	161	85	1103	485	-0.00566751
BK.IR.012	BK.IR.007	161	85	485	1103	-0.00566751
EB.LC.004	NZ.LC.005	285	148	954	968	-0.0057232
NZ.LC.005	EB.LC.004	285	148	968	954	-0.0057232
BK.IR.013	BK.IR.014	26	16	954	90	-0.00574713
BK.IR.014	BK.IR.013	26	16	90	954	-0.00574713
EB.LC.003	SY.LC.1.015	288	150	1041	1047	-0.00574713
SY.LC.1.015	EB.LC.003	288	150	1047	1041	-0.00574713
SY.IR.2.001	WL.IR.002	286	149	1136	951	-0.00574988
WL.IR.002	SY.IR.2.001	286	149	951	1136	-0.00574988
BK.IR.018	EB.IR.006	49	28	145	1071	-0.00575658
EB.IR.006	BK.IR.018	49	28	1071	145	-0.00575658
BL.IR.015	WL.IR.011	326	169	1046	1037	-0.00576092
WL.IR.011	BL.IR.015	326	169	1037	1046	-0.00576092
BL.IR.012	EB.IR.005	202	106	756	977	-0.00577034
EB.IR.005	BL.IR.012	202	106	977	756	-0.00577034
EB.IR.008	SY.LC.2.001	264	138	960	1107	-0.00580552
SY.LC.2.001	EB.IR.008	264	138	1107	960	-0.00580552
BL.IR.032	SY.IR.2.002	347	180	1085	1154	-0.00580616
SY.IR.2.002	BL.IR.032	347	180	1154	1085	-0.00580616
NZ.IR.006	SY.LC.2.004	315	164	1085	1139	-0.00584532
SY.LC.2.004	NZ.IR.006	315	164	1139	1085	-0.00584532
BL.IR.018	SY.LC.1.011	333	173	1110	1076	-0.00594694
SY.LC.1.011	BL.IR.018	333	173	1076	1110	-0.00594694
EB.LC.004	EB.LC.010	266	139	954	1047	-0.005997
EB.LC.010	EB.LC.004	266	139	1047	954	-0.005997
BK.IR.006	BK.IR.014	13	8	408	90	-0.0060241
BK.IR.014	BK.IR.006	13	8	90	408	-0.0060241
BK.IR.012	NZ.IR.007	143	76	485	1003	-0.00604839
NZ.IR.007	BK.IR.012	143	76	1003	485	-0.00604839
EB.LC.003	SY.IR.2.004	309	161	1041	1107	-0.00605214
SY.IR.2.004	EB.LC.003	309	161	1107	1041	-0.00605214
BK.IR.015	SY.IR.2.001	285	149	996	1136	-0.00609756
SY.IR.2.001	BK.IR.015	285	149	1136	996	-0.00609756
BK.IR.001	BK.IR.018	47	26	672	145	-0.00611995
BK.IR.018	BK.IR.001	47	26	145	672	-0.00611995
BL.IR.015	WL.IR.018	351	182	1046	1075	-0.00612918
WL.IR.018	BL.IR.015	351	182	1075	1046	-0.00612918
BK.IR.007	NZ.LC.M+1.010	362	188	1103	1176	-0.00614305
NZ.LC.M+1.010	BK.IR.007	362	188	1176	1103	-0.00614305
EB.IR.002	EB.LC.003	307	160	1070	1041	-0.00615822
EB.LC.003	EB.IR.002	307	160	1041	1070	-0.00615822
BL.IR.015	EB.LC.003	313	163	1046	1041	-0.00622904
BL.IR.016	WL.IR.020	283	148	992	1095	-0.00622904
EB.LC.003	BL.IR.015	313	163	1041	1046	-0.00622904
WL.IR.020	BL.IR.016	283	148	1095	992	-0.00622904
NZ.IR.006	SY.IR.2.003	342	178	1085	1161	-0.0062333
SY.IR.2.003	NZ.IR.006	342	178	1161	1085	-0.0062333
BK.IR.018	WL.IR.017	47	27	145	972	-0.00626679
WL.IR.017	BK.IR.018	47	27	972	145	-0.00626679
BK.IR.006	WL.IR.021	113	61	408	1022	-0.00629371
WL.IR.021	BK.IR.006	113	61	1022	408	-0.00629371
BK.IR.012	WL.IR.022	162	86	485	1100	-0.00630915
WL.IR.022	BK.IR.012	162	86	1100	485	-0.00630915
BK.IR.009	BL.IR.016	183	97	740	992	-0.00635104
BL.IR.016	BK.IR.009	183	97	992	740	-0.00635104
NZ.IR.004	SY.IR.2.003	332	173	1040	1161	-0.00636075
SY.IR.2.003	NZ.IR.004	332	173	1161	1040	-0.00636075
BL.IR.023	BL.IR.031	307	160	1114	926	-0.00637255
BL.IR.031	BL.IR.023	307	160	926	1114	-0.00637255
BL.IR.018	WL.IR.018	342	178	1110	1075	-0.00640732
WL.IR.018	BL.IR.018	342	178	1075	1110	-0.00640732
BL.IR.001	EB.LC.008	172	91	680	879	-0.00641437
EB.LC.008	BL.IR.001	172	91	879	680	-0.00641437
NZ.IR.009	SY.LC.2.005	327	171	1190	1144	-0.00642674
SY.LC.2.005	NZ.IR.009	327	171	1144	1190	-0.00642674
BK.IR.020	BL.IR.001	171	91	1023	680	-0.00645919
BL.IR.001	BK.IR.020	171	91	680	1023	-0.00645919
BL.IR.030	EB.LC.003	296	155	1108	1041	-0.00651466
EB.LC.003	BL.IR.030	296	155	1041	1108	-0.00651466
BK.IR.010	NZ.LC.M+1.007	56	32	209	1016	-0.00653061
NZ.LC.M+1.007	BK.IR.010	56	32	1016	209	-0.00653061
BK.IR.007	WL.IR.011	354	184	1103	1037	-0.00654206
WL.IR.011	BK.IR.007	354	184	1037	1103	-0.00654206
NZ.LC.001	SY.IR.2.005	369	192	1132	1145	-0.00658762
SY.IR.2.005	NZ.LC.001	369	192	1145	1132	-0.00658762
NZ.LC.006	SY.IR.2.005	363	189	1130	1145	-0.00659341
SY.IR.2.005	NZ.LC.006	363	189	1145	1130	-0.00659341
BK.IR.010	SY.LC.2.007	55	32	209	1149	-0.00662739
SY.LC.2.007	BK.IR.010	55	32	1149	209	-0.00662739
BL.IR.009	SY.IR.2.004	324	169	998	1107	-0.00665083
SY.IR.2.004	BL.IR.009	324	169	1107	998	-0.00665083
BK.IR.013	BK.IR.015	315	164	954	996	-0.00666667
BK.IR.014	EB.IR.008	21	14	90	960	-0.00666667
BK.IR.015	BK.IR.013	315	164	996	954	-0.00666667
EB.IR.008	BK.IR.014	21	14	960	90	-0.00666667
BL.IR.033	EB.LC.004	294	154	1123	954	-0.00674049
EB.LC.004	BL.IR.033	294	154	954	1123	-0.00674049
EB.IR.006	SY.IR.2.005	371	193	1071	1145	-0.00676895
SY.IR.2.005	EB.IR.006	371	193	1145	1071	-0.00676895
BK.IR.012	SY.LC.2.004	125	68	485	1139	-0.0067734
SY.LC.2.004	BK.IR.012	125	68	1139	485	-0.0067734
BL.IR.032	BL.IR.033	371	193	1085	1123	-0.00679348
BL.IR.033	BL.IR.032	371	193	1123	1085	-0.00679348
EB.LC.001	WL.IR.021	141	76	593	1022	-0.00681115
WL.IR.021	EB.LC.001	141	76	1022	593	-0.00681115
BK.IR.014	BL.IR.003	26	17	90	1083	-0.00682012
BL.IR.003	BK.IR.014	26	17	1083	90	-0.00682012
BL.IR.014	SY.LC.2.001	289	152	1092	1107	-0.00682128
SY.LC.2.001	BL.IR.014	289	152	1107	1092	-0.00682128
BL.IR.003	BL.IR.014	353	184	1083	1092	-0.00689655
BL.IR.014	BL.IR.003	353	184	1092	1083	-0.00689655
NZ.LC.001	WL.IR.011	345	180	1132	1037	-0.00691563
WL.IR.011	NZ.LC.001	345	180	1037	1132	-0.00691563
BL.IR.001	WL.IR.025	214	113	680	1041	-0.00697269
WL.IR.025	BL.IR.001	214	113	1041	680	-0.00697269
BK.IR.012	BL.IR.014	161	86	485	1092	-0.00697527
BL.IR.014	BK.IR.012	161	86	1092	485	-0.00697527
NZ.LC.M+1.009	SY.LC.2.003	309	162	1034	1108	-0.0070028
SY.LC.2.003	NZ.LC.M+1.009	309	162	1108	1034	-0.0070028
BK.IR.012	BL.IR.032	151	81	485	1085	-0.00700637
BL.IR.032	BK.IR.012	151	81	1085	485	-0.00700637
BK.IR.018	SY.LC.2.004	47	28	145	1139	-0.00700935
SY.LC.2.004	BK.IR.018	47	28	1139	145	-0.00700935
BK.IR.015	BK.IR.018	46	27	996	145	-0.00701139
BK.IR.018	BK.IR.015	46	27	145	996	-0.00701139
EB.LC.001	SY.LC.2.001	162	87	593	1107	-0.00705882
SY.LC.2.001	EB.LC.001	162	87	1107	593	-0.00705882
BL.IR.034	WL.IR.012	178	95	609	1088	-0.0070713
WL.IR.012	BL.IR.034	178	95	1088	609	-0.0070713
BK.IR.014	BL.IR.012	16	11	90	756	-0.0070922
BL.IR.012	BK.IR.014	16	11	756	90	-0.0070922
NZ.LC.M+1.010	SY.LC.1.011	370	193	1176	1076	-0.0071048
SY.LC.1.011	NZ.LC.M+1.010	370	193	1076	1176	-0.0071048
BL.IR.033	EB.IR.005	325	170	1123	977	-0.00714286
EB.IR.005	BL.IR.033	325	170	977	1123	-0.00714286
NZ.IR.006	SY.IR.2.005	364	190	1085	1145	-0.00717489
SY.IR.2.005	NZ.IR.006	364	190	1145	1085	-0.00717489
EB.LC.010	WL.IR.025	357	186	1047	1041	-0.00718391
WL.IR.025	EB.LC.010	357	186	1041	1047	-0.00718391
BK.IR.012	NZ.LC.M+1.010	150	81	485	1176	-0.00722456
NZ.LC.M+1.010	BK.IR.012	150	81	1176	485	-0.00722456
BK.IR.012	BL.IR.012	115	62	485	756	-0.00725222
BL.IR.012	BK.IR.012	115	62	756	485	-0.00725222
BL.IR.001	BL.IR.011	168	90	680	967	-0.00728597
BL.IR.011	BL.IR.001	168	90	967	680	-0.00728597
BL.IR.014	WL.IR.022	334	175	1092	1100	-0.00729927
WL.IR.022	BL.IR.014	334	175	1100	1092	-0.00729927
BK.IR.010	BL.IR.034	32	19	209	609	-0.00733496
BL.IR.034	BK.IR.010	32	19	609	209	-0.00733496
BK.IR.018	WL.IR.018	47	28	145	1075	-0.00737705
WL.IR.018	BK.IR.018	47	28	1075	145	-0.00737705
BK.IR.010	SY.LC.2.004	52	31	209	1139	-0.0074184
SY.LC.2.004	BK.IR.010	52	31	1139	209	-0.0074184
NZ.IR.005	WL.IR.024	344	180	1088	1064	-0.00743494
WL.IR.024	NZ.IR.005	344	180	1064	1088	-0.00743494
SY.LC.1.015	SY.LC.2.002	276	146	1047	1098	-0.00745921
SY.LC.2.002	SY.LC.1.015	276	146	1098	1047	-0.00745921
NZ.IR.007	NZ.LC.001	324	170	1003	1132	-0.00749415
NZ.LC.001	NZ.IR.007	324	170	1132	1003	-0.00749415
BK.IR.015	BL.IR.033	326	171	996	1123	-0.00755073
BL.IR.033	BK.IR.015	326	171	1123	996	-0.00755073
BK.IR.006	EB.LC.010	109	60	408	1047	-0.00756014
EB.LC.010	BK.IR.006	109	60	1047	408	-0.00756014
BK.IR.008	BK.IR.019	116	63	922	399	-0.00757002
BK.IR.019	BK.IR.008	116	63	399	922	-0.00757002
EB.LC.004	WL.IR.021	269	142	954	1022	-0.00759109
WL.IR.021	EB.LC.004	269	142	1022	954	-0.00759109
NZ.IR.002	SY.LC.2.005	307	162	1090	1144	-0.00760967
SY.LC.2.005	NZ.IR.002	307	162	1144	1090	-0.00760967
EB.IR.001	SY.IR.2.001	313	165	1076	1136	-0.00768535
SY.IR.2.001	EB.IR.001	313	165	1136	1076	-0.00768535
SY.IR.2.001	WL.IR.024	325	171	1136	1064	-0.00772727
WL.IR.024	SY.IR.2.001	325	171	1064	1136	-0.00772727
BK.IR.010	BK.IR.013	57	33	209	954	-0.00773861
BK.IR.013	BK.IR.010	57	33	954	209	-0.00773861
NZ.IR.006	WL.IR.022	357	187	1085	1100	-0.00778032
WL.IR.022	NZ.IR.006	357	187	1100	1085	-0.00778032
BK.IR.008	WL.IR.016	261	138	922	1003	-0.00779221
WL.IR.016	BK.IR.008	261	138	1003	922	-0.00779221
NZ.IR.008	NZ.LC.M+1.007	324	170	1028	1016	-0.00782779
NZ.LC.M+1.007	NZ.IR.008	324	170	1016	1028	-0.00782779
[truncated: 7,122 more rows]
[truncated: 3 more columns]
